# Supplementary material for: OLFML2A Downregulation Inhibits Glioma Proliferation through Suppression of Wnt/β-catenin Signaling
Source: Research Square preprint supplement (doi:10.21203/rs.3.rs-126643/v1), 2020-12-16
Supplement: Supplementary file 1 [file cbc2b113dd239a32eed5d11f.xlsx]

## Sheet: Different Gene
Entrez	Gene Symbol	Gene Title	N6494-1	N6494-2	N6494-3	N6495-1	N6495-2	N6495-3	Fold Change	logFC	absolute FC	Regulation	P-value	FDR
83445	GSG1	germ cell associated 1	5.96277	6.22951	6.30643	4.97649	4.86054	5.23662	-2.20639	-1.14169	2.20639	down	5.39091e-08	2.15801e-07
3885	KRT34	keratin 34, type I	6.8894	6.80959	6.85715	5.79004	5.56896	5.95528	-2.11494	-1.08062	2.11494	down	6.03478e-09	3.03714e-08
221184	CPNE2	copine II	8.34401	8.23437	8.496	6.88323	6.72573	6.74122	-2.9788	-1.57473	2.9788	down	1.33272e-12	2.19578e-11
171586	ABHD3	abhydrolase domain containing 3	6.51746	6.41425	6.62523	5.31113	5.46124	5.34555	-2.21352	-1.14634	2.21352	down	6.08157e-10	3.9896e-09
10241	CALCOCO2	calcium binding and coiled-coil domain 2	6.97387	6.94489	7.15583	5.83	5.72638	5.68093	-2.42686	-1.27909	2.42686	down	7.30164e-11	6.29602e-10
27338	UBE2S	ubiquitin conjugating enzyme E2S	11.5289	11.5951	11.6047	9.90367	9.91884	9.98566	-3.11707	-1.64019	3.11707	down	4.53695e-17	6.89511e-15
23231	SEL1L3	sel-1 suppressor of lin-12-like 3 (C. elegans)	8.81941	8.74368	8.73126	10.6867	10.6971	10.722	3.82952	1.93716	3.82952	up	6.74494e-18	1.86246e-15
283209	PGM2L1	phosphoglucomutase 2-like 1	5.50082	5.49834	5.60578	7.58653	7.64532	7.63473	4.24927	2.08721	4.24927	up	7.24439e-15	3.32349e-13
10444	ZER1	zyg-11 related, cell cycle regulator	6.34501	6.24948	6.51541	7.48688	7.6214	7.59784	2.29539	1.19874	2.29539	up	9.95461e-11	8.24653e-10
24140	FTSJ1	FtsJ RNA methyltransferase homolog 1 (E. coli)	10.6788	10.7077	10.6514	9.67661	9.65707	9.65679	-2.02204	-1.01581	2.02204	down	6.58989e-15	3.08709e-13
64151	NCAPG	non-SMC condensin I complex subunit G	9.96299	10.0868	9.92113	7.30277	7.23122	7.29443	-6.56219	-2.71418	6.56219	down	5.75344e-18	1.72925e-15
64089	SNX16	sorting nexin 16	5.94342	5.81582	5.87395	7.02748	6.96456	6.94662	2.14626	1.10182	2.14626	up	6.65522e-11	5.81313e-10
27316	RBMX	RNA binding motif protein, X-linked	10.414	10.5289	10.3077	9.38635	9.36042	9.40297	-2.04719	-1.03365	2.04719	down	2.63997e-12	3.81827e-11
9653	HS2ST1	heparan sulfate 2-O-sulfotransferase 1	6.23877	6.12201	6.27666	4.66049	4.63049	4.3544	-3.16898	-1.66402	3.16898	down	6.12467e-11	5.42079e-10
57606	SLAIN2	SLAIN motif family member 2	6.00582	6.11062	6.01657	4.43346	4.57211	4.46703	-2.93522	-1.55347	2.93522	down	1.56171e-11	1.6883e-10
57326	PBXIP1	pre-B-cell leukemia homeobox interacting protein 1	5.22911	5.17831	5.37672	6.82463	6.78286	6.62248	2.79325	1.48194	2.79325	up	3.26512e-11	3.1425e-10
23507	LRRC8B	leucine-rich repeat containing 8 family member B	4.97952	4.88406	5.01487	3.97446	3.81949	3.68636	-2.19271	-1.13271	2.19271	down	1.12433e-08	5.27101e-08
5425	POLD2	polymerase (DNA directed), delta 2, accessory subunit	10.3478	10.4717	10.4966	8.91833	8.92595	8.92914	-2.8565	-1.51425	2.8565	down	1.58752e-15	1.02589e-13
1491	CTH	cystathionine gamma-lyase	6.75073	6.71807	6.80179	10.0479	10.1078	10.084	10.0076	3.32303	10.0076	up	4.53642e-20	1.36826e-16
57181	SLC39A10	solute carrier family 39 (zinc transporter), member 10	8.70915	8.6771	8.78612	6.94385	6.97317	6.97608	-3.38641	-1.75976	3.38641	down	1.29457e-15	8.68163e-14
85455	DISP2	dispatched homolog 2 (Drosophila)	5.8968	5.76254	5.65508	4.78407	4.64791	4.83786	-2.02071	-1.01486	2.02071	down	1.6683e-08	7.51367e-08
81614	NIPA2	non imprinted in Prader-Willi/Angelman syndrome 2	8.21369	8.09878	8.085	7.10543	7.09831	7.10184	-2.04292	-1.03063	2.04292	down	4.88554e-12	6.38966e-11
54942	FAM206A	family with sequence similarity 206 member A	8.53881	8.58313	8.6488	7.33617	7.33565	7.37693	-2.36307	-1.24066	2.36307	down	1.09025e-13	2.91999e-12
10116	FEM1B	fem-1 homolog b (C. elegans)	5.69631	5.6698	5.8357	6.95413	6.73803	6.9439	2.21108	1.14475	2.21108	up	5.74856e-10	3.80167e-09
1829	DSG2	desmoglein 2	7.74605	7.66669	7.7681	6.28587	6.32087	6.46519	-2.58405	-1.36964	2.58405	down	2.34908e-12	3.47969e-11
79974	CPED1	cadherin-like and PC-esterase domain containing 1	5.00631	5.04264	5.04342	3.75333	3.5423	3.42542	-2.74557	-1.45711	2.74557	down	5.98815e-10	3.93622e-09
6675	UAP1	UDP-N-acetylglucosamine pyrophosphorylase 1	8.68874	8.68195	8.79795	6.07759	6.12464	6.04938	-6.22904	-2.63901	6.22904	down	3.5454e-17	5.74442e-15
54823	SWT1	SWT1, RNA endoribonuclease homolog	5.10747	5.10316	5.20827	6.83756	6.71375	6.82206	3.14158	1.65149	3.14158	up	1.53428e-12	2.4577e-11
2770	GNAI1	guanine nucleotide binding protein (G protein), alpha inhibiting activity polypeptide 1	6.71716	6.66997	6.68244	7.98907	7.8972	7.83111	2.32292	1.21594	2.32292	up	2.07397e-12	3.13615e-11
332	BIRC5	baculoviral IAP repeat containing 5	8.73126	8.70473	8.71699	6.23194	6.13201	6.30238	-5.63943	-2.49555	5.63943	down	1.03489e-16	1.28412e-14
64960	MRPS15	mitochondrial ribosomal protein S15	11.2789	11.3056	11.3	10.262	10.2402	10.2709	-2.05217	-1.03715	2.05217	down	1.57817e-15	1.02281e-13
157313	CDCA2	cell division cycle associated 2	6.75704	6.75233	6.80273	4.45644	4.28595	4.22898	-5.45247	-2.44691	5.45247	down	4.52346e-14	1.42462e-12
119548	PNLIPRP3	pancreatic lipase-related protein 3	4.35547	4.45498	4.47581	5.98411	5.96071	6.12936	3.02298	1.59597	3.02298	up	1.77799e-11	1.88368e-10
5916	RARG	retinoic acid receptor, gamma	7.41594	7.39645	7.3587	8.3992	8.35268	8.4433	2.01116	1.00803	2.01116	up	1.59509e-12	2.53725e-11
114882	OSBPL8	oxysterol binding protein like 8	6.4702	6.43523	6.45344	7.5506	7.62583	7.67025	2.23861	1.1626	2.23861	up	3.80335e-12	5.22345e-11
80314	EPC1	enhancer of polycomb homolog 1 (Drosophila)	4.96397	5.02539	5.10316	6.12935	6.19866	6.15717	2.18993	1.13089	2.18993	up	3.91823e-10	2.724e-09
104	ADARB1	adenosine deaminase, RNA-specific, B1	4.99439	5.02451	5.17113	6.50948	6.81725	6.79058	3.12191	1.64243	3.12191	up	4.67803e-11	4.29467e-10
138199	CARNMT1	carnosine N-methyltransferase 1	6.82489	6.77292	6.95655	5.82875	5.8211	5.89114	-2.00619	-1.00446	2.00619	down	5.64535e-10	3.74478e-09
4751	NEK2	NIMA-related kinase 2	8.59287	8.38621	8.27482	4.70268	4.87773	4.92389	-11.9853	-3.5832	11.9853	down	5.50017e-16	4.49295e-14
100134259	LINC01119	long intergenic non-protein coding RNA 1119	8.01236	7.94386	8.08636	6.2459	6.27058	6.29605	-3.34812	-1.74335	3.34812	down	1.93028e-14	7.20822e-13
692149	SCARNA14	small Cajal body-specific RNA 14	4.54804	4.47643	4.54141	6.30508	6.28712	6.37638	3.48438	1.8009	3.48438	up	9.42901e-13	1.66237e-11
9429	ABCG2	ATP binding cassette subfamily G member 2 (Junior blood group)	7.24236	7.23891	7.26023	6.10216	6.14958	6.11098	-2.18292	-1.12626	2.18292	down	8.2089e-12	9.85219e-11
55331	ACER3	alkaline ceramidase 3	6.06148	6.14768	6.12676	4.50727	4.84212	4.84767	-2.602	-1.37962	2.602	down	9.61991e-10	5.98725e-09
23142	DCUN1D4	DCN1, defective in cullin neddylation 1, domain containing 4	7.88702	7.82254	7.74861	6.6845	6.59559	6.78402	-2.19064	-1.13135	2.19064	down	2.59556e-11	2.5941e-10
55754	TMEM30A	transmembrane protein 30A	8.60386	8.61546	8.52448	9.59082	9.66881	9.52102	2.0171	1.01228	2.0171	up	1.24982e-12	2.08711e-11
29015	SLC43A3	solute carrier family 43, member 3	7.81791	8.03757	7.83523	6.87506	6.86137	6.92919	-2.01163	-1.00836	2.01163	down	1.43175e-10	1.13389e-09
9668	ZNF432	zinc finger protein 432	5.72399	5.59483	5.65656	6.60233	6.77318	6.86709	2.12737	1.08907	2.12737	up	1.23422e-09	7.47511e-09
375387	NRROS	negative regulator of reactive oxygen species	4.85624	4.74819	4.96397	6.13256	6.12771	6.29241	2.51071	1.32809	2.51071	up	2.69714e-10	1.96643e-09
9245	GCNT3	glucosaminyl (N-acetyl) transferase 3, mucin type	6.93646	6.92267	6.94871	8.21486	8.13869	8.38018	2.47706	1.30863	2.47706	up	2.82304e-12	4.03541e-11
9792	SERTAD2	SERTA domain containing 2	5.78349	6.01226	5.76214	6.9238	6.87605	6.83232	2.03462	1.02476	2.03462	up	1.78519e-09	1.03808e-08
2060	EPS15	epidermal growth factor receptor pathway substrate 15	7.87861	7.67028	7.87938	6.52998	6.49328	6.47029	-2.48212	-1.31157	2.48212	down	6.29177e-12	7.87929e-11
2187	FANCB	Fanconi anemia complementation group B	6.15485	6.07215	6.38591	4.22111	4.72892	4.54189	-3.2648	-1.707	3.2648	down	1.29732e-09	7.81498e-09
58538	MPP4	membrane protein, palmitoylated 4	8.06628	7.91281	7.9069	6.56565	6.59581	6.66027	-2.55753	-1.35475	2.55753	down	1.17528e-12	1.98633e-11
23035	PHLPP2	PH domain and leucine rich repeat protein phosphatase 2	7.74268	7.72311	7.71136	8.85138	8.9179	8.94727	2.26545	1.1798	2.26545	up	6.45739e-14	1.88951e-12
51702	PADI3	peptidyl arginine deiminase, type III	6.7597	6.84167	6.66885	5.18915	5.43861	5.59263	-2.54902	-1.34994	2.54902	down	1.06717e-09	6.56371e-09
4436	MSH2	mutS homolog 2	7.7759	7.82486	7.58458	5.66467	5.80803	5.75439	-3.9616	-1.98608	3.9616	down	1.49042e-13	3.73685e-12
3150	HMGN1	high mobility group nucleosome binding domain 1	11.0433	11.1674	11.0404	9.35499	9.36479	9.32984	-3.32607	-1.73382	3.32607	down	1.07164e-16	1.30732e-14
28991	COMMD5	COMM domain containing 5	7.69838	7.54121	7.71312	8.72193	8.69477	8.77216	2.11216	1.07872	2.11216	up	4.33448e-12	5.79458e-11
993	CDC25A	cell division cycle 25A	6.38853	6.28778	6.20601	3.52369	3.42617	3.61873	-6.82696	-2.77124	6.82696	down	2.98905e-14	1.0218e-12
5099	PCDH7	protocadherin 7	6.01419	6.09883	6.01869	7.13106	7.25661	7.09224	2.16755	1.11607	2.16755	up	6.79278e-11	5.91352e-10
80124	VCPIP1	valosin containing protein (p97)/p47 complex interacting protein 1	5.97811	5.86536	6.13638	7.29857	7.43286	7.35727	2.58402	1.36962	2.58402	up	2.86325e-11	2.81373e-10
6917	TCEA1	transcription elongation factor A (SII), 1	10.2627	10.2434	10.0458	9.15603	9.07072	8.91229	-2.20019	-1.13763	2.20019	down	4.63593e-11	4.26401e-10
55686	MREG	melanoregulin	6.5147	6.53245	6.61327	8.08279	8.0412	8.03344	2.82647	1.499	2.82647	up	5.07176e-14	1.56586e-12
86	ACTL6A	actin like 6A	10.1791	10.285	10.1638	8.87348	8.92896	8.9051	-2.47391	-1.30679	2.47391	down	7.09569e-15	3.27706e-13
90390	MED30	mediator complex subunit 30	6.49812	6.60935	6.60576	5.37489	5.55377	5.54398	-2.11432	-1.0802	2.11432	down	7.51796e-10	4.8277e-09
7532	YWHAG	tyrosine 3-monooxygenase/tryptophan 5-monooxygenase activation protein, gamma	5.64954	5.75742	5.80281	6.63633	7.00854	6.92118	2.1716	1.11876	2.1716	up	6.009e-09	3.02533e-08
5250	SLC25A3	solute carrier family 25 (mitochondrial carrier; phosphate carrier), member 3	11.219	11.2139	11.1886	10.2834	10.196	10.0655	-2.0357	-1.02553	2.0357	down	1.73632e-12	2.72105e-11
10535	RNASEH2A	ribonuclease H2 subunit A	9.43725	9.47246	9.46545	7.24708	7.31556	7.32335	-4.47863	-2.16306	4.47863	down	1.25305e-17	2.72528e-15
93487	MAPK1IP1L	mitogen-activated protein kinase 1 interacting protein 1-like	8.63525	8.60139	8.35524	6.53846	6.50644	6.30748	-4.22758	-2.07983	4.22758	down	2.47453e-13	5.62797e-12
127262	TPRG1L	tumor protein p63 regulated 1-like	7.2787	7.38551	7.35008	8.83184	8.82026	8.75222	2.75747	1.46334	2.75747	up	1.4704e-14	5.79373e-13
4688	NCF2	neutrophil cytosolic factor 2	4.95058	4.95466	5.14363	6.5697	6.54045	6.57061	2.91594	1.54396	2.91594	up	9.82467e-12	1.14378e-10
83463	MXD3	MAX dimerization protein 3	7.73186	7.83486	7.72672	6.17585	6.37995	6.43017	-2.70537	-1.43582	2.70537	down	6.63104e-12	8.23576e-11
55143	CDCA8	cell division cycle associated 8	9.29795	9.253	9.21445	6.68038	6.67471	6.56229	-6.13051	-2.61601	6.13051	down	1.23579e-17	2.72221e-15
257397	TAB3	TGF-beta activated kinase 1/MAP3K7 binding protein 3	6.10398	6.04981	6.14758	4.75868	4.73593	4.73593	-2.56142	-1.35694	2.56142	down	3.38473e-11	3.24226e-10
55914	ERBB2IP	erbb2 interacting protein	10.0838	10.0664	9.94452	8.95681	8.97416	8.87831	-2.13632	-1.09513	2.13632	down	3.475e-13	7.40743e-12
3552	IL1A	interleukin 1 alpha	5.76838	5.94126	5.82818	7.80272	7.74128	7.78132	3.80835	1.92917	3.80835	up	2.3451e-14	8.42046e-13
375484	SIMC1	SUMO-interacting motifs containing 1	6.40285	6.35963	6.42361	5.04525	5.13558	4.74261	-2.67749	-1.42088	2.67749	down	6.13125e-10	4.01883e-09
3925	STMN1	stathmin 1	10.7626	10.8232	10.6383	9.453	9.46213	9.48835	-2.41757	-1.27356	2.41757	down	4.03672e-14	1.29737e-12
9787	DLGAP5	discs, large (Drosophila) homolog-associated protein 5	9.20933	9.2561	9.10102	6.6385	6.55434	6.69684	-5.89268	-2.55892	5.89268	down	8.23355e-17	1.06371e-14
84912	SLC35B4	solute carrier family 35 (UDP-xylose/UDP-N-acetylglucosamine transporter), member B4	8.32519	8.25893	8.39032	7.02196	7.02347	7.09782	-2.42345	-1.27706	2.42345	down	3.41871e-13	7.31301e-12
5982	RFC2	replication factor C subunit 2	8.92443	8.9376	8.88073	7.47882	7.47183	7.48668	-2.70409	-1.43514	2.70409	down	2.81277e-15	1.60771e-13
6785	ELOVL4	ELOVL fatty acid elongase 4	5.80858	5.83672	5.88727	7.19979	7.226	7.1958	2.57221	1.36301	2.57221	up	1.4056e-12	2.28571e-11
9255	AIMP1	aminoacyl tRNA synthetase complex-interacting multifunctional protein 1	7.84115	7.80602	7.84354	6.65484	6.63171	6.53749	-2.33306	-1.22222	2.33306	down	1.24131e-12	2.07643e-11
4998	ORC1	origin recognition complex subunit 1	7.16029	7.13188	7.34509	5.35168	5.44359	5.67117	-3.30261	-1.72361	3.30261	down	1.54555e-11	1.6736e-10
79846	CFAP69	cilia and flagella associated protein 69	4.09948	4.46183	4.54453	5.63515	5.58944	5.58342	2.35227	1.23406	2.35227	up	1.73006e-08	7.76151e-08
728215	FAM155A	family with sequence similarity 155 member A	6.81388	6.9067	6.91059	7.93404	8.03457	7.97749	2.15095	1.10498	2.15095	up	3.68128e-12	5.07713e-11
3516	RBPJ	recombination signal binding protein for immunoglobulin kappa J region	5.06822	5.22096	4.9638	6.09559	6.29241	6.07436	2.09913	1.06979	2.09913	up	9.50644e-09	4.53906e-08
23536	ADAT1	adenosine deaminase, tRNA-specific 1	7.28099	7.21845	7.37093	6.05451	6.11781	6.01827	-2.34014	-1.22659	2.34014	down	1.30721e-11	1.45571e-10
29777	ABT1	activator of basal transcription 1	9.0586	9.06668	9.14625	7.91176	7.69159	7.76801	-2.46239	-1.30006	2.46239	down	7.97148e-13	1.43905e-11
5786	PTPRA	protein tyrosine phosphatase, receptor type, A	6.7352	6.64519	6.67631	5.5505	5.79506	5.70708	-2.00188	-1.00135	2.00188	down	2.15221e-09	1.22266e-08
11276	SYNRG	synergin, gamma	5.03466	4.98932	5.08874	6.07759	5.92259	6.11677	2.00196	1.00141	2.00196	up	4.58867e-09	2.38433e-08
55748	CNDP2	CNDP dipeptidase 2 (metallopeptidase M20 family)	7.93738	8.02259	7.98727	6.97124	6.97082	6.90791	-2.04546	-1.03242	2.04546	down	4.10152e-12	5.55985e-11
79902	NUP85	nucleoporin 85kDa	8.51751	8.39251	8.59197	7.24767	7.36889	7.25418	-2.31404	-1.21042	2.31404	down	4.22237e-12	5.67761e-11
9123	SLC16A3	solute carrier family 16 (monocarboxylate transporter), member 3	9.08335	9.0682	9.13042	10.202	10.3375	10.2506	2.24912	1.16936	2.24912	up	3.8005e-14	1.23257e-12
995	CDC25C	cell division cycle 25C	7.56603	7.50486	7.73513	4.50273	3.94975	3.83064	-11.3737	-3.50763	11.3737	down	5.7115e-13	1.0951e-11
10635	RAD51AP1	RAD51 associated protein 1	8.04197	8.1438	8.19642	6.10198	6.26527	6.12637	-3.89833	-1.96286	3.89833	down	2.26718e-14	8.17811e-13
9341	VAMP3	vesicle associated membrane protein 3	8.81935	8.85369	8.77022	7.68482	7.65561	7.70754	-2.19126	-1.13176	2.19126	down	1.18733e-13	3.11824e-12
6502	SKP2	S-phase kinase-associated protein 2, E3 ubiquitin protein ligase	5.63198	5.7189	5.83775	3.48752	4.07334	3.96693	-3.69852	-1.88695	3.69852	down	9.71183e-10	6.0368e-09
5651	TMPRSS15	transmembrane protease, serine 15	10.2745	10.337	10.2326	8.03958	7.93727	8.06359	-4.81608	-2.26786	4.81608	down	1.79399e-17	3.515e-15
10263	CDK2AP2	cyclin-dependent kinase 2 associated protein 2	8.98026	9.09361	9.10251	8.01515	8.05623	8.06083	-2.02052	-1.01472	2.02052	down	9.13657e-13	1.61882e-11
8303	SNN	stannin	6.50151	6.51648	6.51101	8.0002	7.96328	8.02349	2.80109	1.48599	2.80109	up	3.1801e-14	1.07586e-12
56938	ARNTL2	aryl hydrocarbon receptor nuclear translocator like 2	8.63207	8.67582	8.70171	6.13038	6.27461	6.42102	-5.25806	-2.39453	5.25806	down	3.83508e-15	2.00691e-13
205428	C3orf58	chromosome 3 open reading frame 58	6.71827	6.58254	6.66465	5.38044	5.43188	5.47142	-2.34119	-1.22724	2.34119	down	5.24256e-11	4.74768e-10
93323	HAUS8	HAUS augmin like complex subunit 8	6.99712	7.00057	7.1398	4.96883	5.18875	5.01876	-3.96426	-1.98705	3.96426	down	4.86649e-13	9.62741e-12
3838	KPNA2	karyopherin alpha 2 (RAG cohort 1, importin alpha 1)	11.8886	11.908	11.9175	10.4096	10.3837	10.4515	-2.80842	-1.48976	2.80842	down	2.09759e-17	3.99254e-15
89932	PAPLN	papilin, proteoglycan-like sulfated glycoprotein	4.54515	4.01863	4.3617	5.95849	5.87661	5.83719	2.99441	1.58227	2.99441	up	1.82424e-09	1.05811e-08
94241	TP53INP1	tumor protein p53 inducible nuclear protein 1	8.32293	8.33973	8.44277	10.041	9.99997	10.0821	3.18773	1.67253	3.18773	up	5.63655e-16	4.58525e-14
143458	LDLRAD3	low density lipoprotein receptor class A domain containing 3	7.56886	7.46601	7.62755	5.40496	5.32324	5.15803	-4.7857	-2.25873	4.7857	down	5.71259e-14	1.71509e-12
197131	UBR1	ubiquitin protein ligase E3 component n-recognin 1	6.77161	6.77603	6.90087	7.85916	8.01518	8.01445	2.21416	1.14676	2.21416	up	1.57988e-11	1.70418e-10
4642	MYO1D	myosin ID	6.74147	6.73616	6.57786	5.65602	5.54604	5.59855	-2.12132	-1.08496	2.12132	down	4.05491e-10	2.80708e-09
51188	SS18L2	synovial sarcoma translocation gene on chromosome 18-like 2	9.34161	9.26088	9.35872	8.14314	8.10486	8.13943	-2.28352	-1.19126	2.28352	down	3.11805e-14	1.05943e-12
23649	POLA2	polymerase (DNA directed), alpha 2, accessory subunit	8.61546	8.53217	8.72579	6.28471	6.2612	6.28822	-5.08564	-2.34643	5.08564	down	4.23942e-16	3.70217e-14
1436	CSF1R	colony stimulating factor 1 receptor	7.06982	7.11334	7.15453	5.70517	5.60588	5.79851	-2.65622	-1.40938	2.65622	down	6.49037e-12	8.09181e-11
5983	RFC3	replication factor C subunit 3	8.76465	8.71201	8.72873	6.51837	6.50982	6.49237	-4.68574	-2.22828	4.68574	down	3.97529e-17	6.23484e-15
84296	GINS4	GINS complex subunit 4 (Sld5 homolog)	8.54446	8.48577	8.48739	5.80685	5.58358	5.70829	-6.99488	-2.8063	6.99488	down	1.93421e-16	2.03872e-14
5209	PFKFB3	6-phosphofructo-2-kinase/fructose-2,6-biphosphatase 3	9.8291	9.75246	9.7828	10.9542	10.9336	11.0003	2.25729	1.17459	2.25729	up	2.87686e-15	1.63956e-13
1263	PLK3	polo-like kinase 3	6.45724	6.40873	6.48546	8.04009	8.08567	8.1318	3.10669	1.63538	3.10669	up	1.82634e-14	6.87904e-13
94101	ORMDL1	ORMDL sphingolipid biosynthesis regulator 1	6.38112	6.32469	6.15742	4.79556	4.93838	5.01291	-2.58852	-1.37213	2.58852	down	2.55517e-10	1.87794e-09
5906	RAP1A	RAP1A, member of RAS oncogene family	9.67459	9.67514	9.53243	8.09857	8.11117	8.10697	-2.87152	-1.52182	2.87152	down	4.59687e-15	2.31675e-13
6941	TCF19	transcription factor 19	8.81962	8.93134	8.90974	5.40959	5.10516	5.10128	-12.831	-3.68156	12.831	down	1.23567e-16	1.45498e-14
8727	CTNNAL1	catenin alpha-like 1	10.7641	10.7993	10.6403	8.96101	8.8908	8.87202	-3.547	-1.8266	3.547	down	3.81045e-16	3.38027e-14
10558	SPTLC1	serine palmitoyltransferase, long chain base subunit 1	6.06699	5.91545	6.19413	4.19629	4.3934	4.26964	-3.41625	-1.77241	3.41625	down	2.22787e-11	2.27783e-10
23291	FBXW11	F-box and WD repeat domain containing 11	7.09297	6.97214	7.03156	8.20043	8.17702	8.16274	2.21582	1.14784	2.21582	up	8.89099e-13	1.58246e-11
23421	ITGB3BP	integrin beta 3 binding protein (beta3-endonexin)	9.17874	9.27691	9.11865	6.65839	6.67286	6.83145	-5.54249	-2.47053	5.54249	down	3.31237e-16	3.0217e-14
286411	LINC00632	long intergenic non-protein coding RNA 632	5.03295	4.59115	5.00511	6.30622	6.316	6.29638	2.69409	1.4298	2.69409	up	2.0449e-09	1.16984e-08
167359	NIM1K	NIM1 serine/threonine protein kinase	4.50586	4.85231	4.66357	5.60046	5.8211	5.67203	2.03348	1.02395	2.03348	up	6.24476e-08	2.4636e-07
407048	MIR92A1	microRNA 92a-1	5.71353	5.80595	5.91176	4.63024	4.65994	4.79717	-2.16539	-1.11463	2.16539	down	2.96686e-09	1.61946e-08
8722	CTSF	cathepsin F	5.27528	5.26128	5.36349	6.52147	6.52058	6.59333	2.37037	1.24511	2.37037	up	4.42152e-11	4.09452e-10
100131211	NEMP2	nuclear envelope integral membrane protein 2	5.9593	5.68001	6.27933	4.32852	4.53936	4.11138	-3.13065	-1.64646	3.13065	down	1.22057e-08	5.66107e-08
2182	ACSL4	acyl-CoA synthetase long-chain family member 4	9.71218	9.76631	9.56656	8.12743	8.01306	8.05027	-3.0697	-1.6181	3.0697	down	2.22477e-14	8.09965e-13
57542	KLHL42	kelch like family member 42	7.95524	8.01019	7.98998	6.59369	6.56646	6.65707	-2.6016	-1.3794	2.6016	down	1.35247e-13	3.45024e-12
1869	E2F1	E2F transcription factor 1	8.27163	8.35036	8.40629	6.29834	6.49243	6.34742	-3.8997	-1.96336	3.8997	down	1.7026e-14	6.51307e-13
84289	ING5	inhibitor of growth family member 5	5.22376	5.25901	5.49212	6.34262	6.49248	6.57204	2.21006	1.14408	2.21006	up	3.71195e-09	1.97591e-08
5908	RAP1B	RAP1B, member of RAS oncogene family	9.24706	9.35903	8.961	7.57781	7.43529	7.28201	-3.38071	-1.75733	3.38071	down	1.5859e-11	1.70974e-10
11168	PSIP1	PC4 and SFRS1 interacting protein 1	8.53667	8.57505	8.60044	7.17203	7.1609	7.27833	-2.57928	-1.36697	2.57928	down	6.38024e-14	1.87112e-12
147372	CCBE1	collagen and calcium binding EGF domains 1	5.99879	5.90776	6.01963	4.43826	4.66951	4.53241	-2.69198	-1.42867	2.69198	down	1.12915e-10	9.18737e-10
144110	TMEM86A	transmembrane protein 86A	5.08463	5.06346	5.24569	6.21202	6.24861	6.23912	2.14651	1.10199	2.14651	up	7.62358e-10	4.88592e-09
117178	SSX2IP	synovial sarcoma, X breakpoint 2 interacting protein	6.83024	6.89264	7.01497	5.28504	5.46156	5.28077	-2.96938	-1.57016	2.96938	down	8.9952e-12	1.06332e-10
85444	LRRCC1	leucine rich repeat and coiled-coil centrosomal protein 1	4.76776	4.65181	4.7641	3.63171	3.4359	3.38472	-2.36818	-1.24378	2.36818	down	3.24347e-09	1.75392e-08
22837	COBLL1	cordon-bleu WH2 repeat protein like 1	5.77994	5.86379	5.77233	4.74966	4.66324	4.53824	-2.2268	-1.15497	2.2268	down	1.35431e-09	8.11842e-09
8847	DLEU2	deleted in lymphocytic leukemia 2 (non-protein coding)	7.58428	7.52891	7.36647	6.2077	6.16007	6.03724	-2.56368	-1.35822	2.56368	down	1.7561e-11	1.86351e-10
6646	SOAT1	sterol O-acyltransferase 1	9.36741	9.29353	9.27513	7.85805	7.8827	7.8775	-2.71184	-1.43927	2.71184	down	2.35371e-15	1.40044e-13
9475	ROCK2	Rho-associated, coiled-coil containing protein kinase 2	8.81811	8.83492	8.94341	7.66762	7.69019	7.71013	-2.25976	-1.17617	2.25976	down	1.96033e-13	4.66694e-12
55010	PARPBP	PARP1 binding protein	4.73408	4.84596	5.07267	3.85274	4.03218	3.743	-2.01149	-1.00826	2.01149	down	2.24217e-07	7.92318e-07
54815	GATAD2A	GATA zinc finger domain containing 2A	8.13767	8.2244	8.20239	7.0397	6.95344	6.91323	-2.32844	-1.21936	2.32844	down	8.22892e-13	1.48143e-11
22861	NLRP1	NLR family, pyrin domain containing 1	9.34419	9.35286	9.39766	10.384	10.3535	10.3657	2.00391	1.00282	2.00391	up	1.32222e-14	5.36691e-13
7728	ZNF175	zinc finger protein 175	7.78722	7.80832	7.78648	6.04545	6.12681	6.07741	-3.27339	-1.71078	3.27339	down	1.74841e-14	6.63008e-13
6224	RPS20	ribosomal protein S20	4.92304	4.6966	4.97699	3.637	3.6711	3.54855	-2.37291	-1.24666	2.37291	down	4.0016e-09	2.11061e-08
9052	GPRC5A	G protein-coupled receptor, class C, group 5, member A	6.46607	6.46548	6.45415	4.26767	4.01412	3.91128	-5.26905	-2.39754	5.26905	down	5.17192e-13	1.01143e-11
79073	TMEM109	transmembrane protein 109	9.70979	9.8281	9.82092	8.6864	8.78167	8.71611	-2.08235	-1.05821	2.08235	down	3.59456e-13	7.61441e-12
51290	ERGIC2	ERGIC and golgi 2	5.37813	5.26142	5.46505	4.03665	3.65437	3.52192	-3.09632	-1.63055	3.09632	down	2.38907e-09	1.33879e-08
3178	HNRNPA1	heterogeneous nuclear ribonucleoprotein A1	9.12746	9.25643	8.6617	7.70414	7.92178	7.82254	-2.29587	-1.19904	2.29587	down	4.09954e-08	1.68582e-07
55681	SCYL2	SCY1-like, kinase-like 2	7.25917	7.24178	7.10711	5.78596	6.05316	6.03848	-2.3677	-1.24349	2.3677	down	2.57301e-10	1.88999e-09
10447	FAM3C	family with sequence similarity 3 member C	8.20858	8.24136	8.07492	9.52697	9.46723	9.38499	2.43644	1.28478	2.43644	up	3.6259e-13	7.65185e-12
56895	AGPAT4	1-acylglycerol-3-phosphate O-acyltransferase 4	7.50349	7.56821	7.61614	8.87021	8.83459	8.8513	2.4443	1.28942	2.4443	up	3.5973e-14	1.17542e-12
54930	HAUS4	HAUS augmin like complex subunit 4	7.53123	7.64135	7.58377	6.38219	6.32852	6.52185	-2.2573	-1.1746	2.2573	down	2.41943e-11	2.43746e-10
55266	TMEM19	transmembrane protein 19	7.8	7.81547	7.78557	6.58346	6.47615	6.52734	-2.4139	-1.27136	2.4139	down	6.27161e-13	1.18397e-11
8021	NUP214	nucleoporin 214kDa	6.70753	6.68491	6.94022	5.34687	5.76029	5.54389	-2.34113	-1.2272	2.34113	down	8.36517e-09	4.05237e-08
100534611	TM4SF19-TCTEX1D2	TM4SF19-TCTEX1D2 readthrough (NMD candidate)	7.27054	7.24864	7.30138	8.82989	8.86856	8.87369	2.99771	1.58386	2.99771	up	1.24114e-15	8.40501e-14
57645	POGK	pogo transposable element with KRAB domain	9.14945	9.03684	9.15258	7.85298	8.04665	8.00682	-2.21014	-1.14414	2.21014	down	3.83909e-12	5.26148e-11
23216	TBC1D1	TBC1 domain family member 1	8.2023	8.23949	8.25881	6.61281	6.57053	6.45703	-3.21929	-1.68674	3.21929	down	2.32375e-14	8.35912e-13
8878	SQSTM1	sequestosome 1	10.2293	10.2716	10.2345	11.3625	11.4398	11.4949	2.27716	1.18723	2.27716	up	7.90718e-15	3.58015e-13
7059	THBS3	thrombospondin 3	6.36696	6.42027	6.40271	7.41145	7.52469	7.43493	2.08548	1.06038	2.08548	up	1.91131e-11	1.99953e-10
157567	ANKRD46	ankyrin repeat domain 46	5.64607	5.62561	5.67578	7.77298	7.71372	7.70531	4.23252	2.08152	4.23252	up	2.96651e-15	1.68117e-13
4067	LYN	LYN proto-oncogene, Src family tyrosine kinase	5.4715	5.57065	5.67893	4.54651	4.66113	4.2948	-2.10363	-1.07288	2.10363	down	4.92333e-08	1.9897e-07
11015	KDELR3	KDEL (Lys-Asp-Glu-Leu) endoplasmic reticulum protein retention receptor 3	9.11081	9.15651	9.08969	6.95601	6.92859	7.03138	-4.42909	-2.14701	4.42909	down	6.63333e-17	9.19056e-15
27286	SRPX2	sushi-repeat containing protein, X-linked 2	7.93216	7.92819	8.03111	9.02764	9.11477	9.09079	2.16432	1.11391	2.16432	up	2.95418e-13	6.49654e-12
83641	FAM107B	family with sequence similarity 107 member B	5.30187	5.05161	5.51384	6.37046	6.35796	6.40225	2.12547	1.08778	2.12547	up	3.10137e-08	1.31294e-07
64420	SUSD1	sushi domain containing 1	6.85711	6.89539	7.0102	8.30191	8.30844	8.3051	2.61036	1.38425	2.61036	up	1.45761e-13	3.66835e-12
127700	OSCP1	organic solute carrier partner 1	3.8814	4.03643	4.46301	5.48592	5.24282	5.34228	2.34577	1.23006	2.34577	up	1.84746e-07	6.6227e-07
57478	USP31	ubiquitin specific peptidase 31	6.66221	6.44315	6.5531	5.57968	5.39811	5.54266	-2.0648	-1.046	2.0648	down	2.55992e-09	1.41972e-08
80031	SEMA6D	sema domain, transmembrane domain (TM), and cytoplasmic domain, (semaphorin) 6D	4.56867	4.81221	4.71557	6.34458	6.24861	6.5905	3.23945	1.69575	3.23945	up	8.92996e-11	7.49876e-10
55159	RFWD3	ring finger and WD repeat domain 3	7.26361	7.0825	7.26279	6.16271	6.29379	6.0395	-2.05286	-1.03763	2.05286	down	1.68007e-09	9.83949e-09
23446	SLC44A1	solute carrier family 44 (choline transporter), member 1	10.5197	10.5603	10.4825	9.37437	9.42306	9.39097	-2.18057	-1.12471	2.18057	down	5.56493e-15	2.7241e-13
4485	MST1	macrophage stimulating 1	5.27993	5.49952	5.30424	6.41531	6.64191	6.68301	2.32761	1.21885	2.32761	up	1.54598e-09	9.12508e-09
286530	P2RY8	purinergic receptor P2Y, G-protein coupled, 8	4.12881	3.95974	4.12919	5.77463	5.82722	5.77793	3.29592	1.72068	3.29592	up	8.26165e-12	9.90424e-11
100506965	PWAR6	Prader Willi/Angelman region RNA 6	5.54081	5.35296	5.35002	6.53426	6.70325	6.54709	2.26619	1.18027	2.26619	up	5.48644e-10	3.65297e-09
54557	SGTB	small glutamine-rich tetratricopeptide repeat (TPR)-containing, beta	7.107	7.04297	6.99245	5.31201	5.27888	5.4715	-3.23405	-1.69334	3.23405	down	1.4035e-12	2.28441e-11
7272	TTK	TTK protein kinase	8.12343	8.15694	8.19548	5.39177	5.23777	5.23138	-7.31898	-2.87164	7.31898	down	1.65739e-16	1.81526e-14
84679	SLC9A7	solute carrier family 9, subfamily A (NHE7, cation proton antiporter 7), member 7	6.25163	6.2582	6.35403	7.45171	7.45067	7.41137	2.21908	1.14996	2.21908	up	7.10395e-12	8.70184e-11
84823	LMNB2	lamin B2	10.093	10.1529	10.1334	8.99144	9.05483	9.02529	-2.14737	-1.10257	2.14737	down	1.06766e-14	4.56021e-13
374986	FAM73A	family with sequence similarity 73 member A	6.24877	6.19761	6.41468	7.37007	7.38343	7.35426	2.11731	1.08223	2.11731	up	1.05318e-10	8.64281e-10
51166	AADAT	aminoadipate aminotransferase	6.59106	6.59646	6.49243	5.23022	5.42857	5.33147	-2.3455	-1.2299	2.3455	down	1.52405e-10	1.19948e-09
286410	ATP11C	ATPase, class VI, type 11C	7.73118	7.63974	7.73039	6.4278	6.55214	6.39708	-2.36433	-1.24143	2.36433	down	4.91869e-12	6.42231e-11
1994	ELAVL1	ELAV like RNA binding protein 1	10.2136	10.2385	10.2235	9.16516	9.1758	9.22965	-2.04911	-1.035	2.04911	down	1.35977e-14	5.48524e-13
57089	ENTPD7	ectonucleoside triphosphate diphosphohydrolase 7	6.61777	6.5082	6.7129	8.66668	8.67784	8.65707	4.15325	2.05424	4.15325	up	2.12799e-15	1.29808e-13
23179	RGL1	ral guanine nucleotide dissociation stimulator-like 1	6.11858	6.03312	6.16286	7.08076	7.19899	7.21248	2.08381	1.05922	2.08381	up	1.22611e-10	9.87389e-10
3426	CFI	complement factor I	7.11664	6.9815	7.08168	8.203	8.13375	8.18133	2.16258	1.11275	2.16258	up	2.50241e-12	3.67018e-11
4860	PNP	purine nucleoside phosphorylase	8.52549	8.63484	8.52617	7.36542	7.49674	7.56405	-2.12397	-1.08676	2.12397	down	1.256e-11	1.40788e-10
6187	RPS2	ribosomal protein S2	7.75776	7.75502	7.78532	6.77554	6.72372	6.76149	-2.01733	-1.01245	2.01733	down	5.15915e-12	6.67686e-11
22903	BTBD3	BTB (POZ) domain containing 3	7.33124	7.18853	7.18387	5.70734	5.78057	5.7057	-2.83499	-1.50334	2.83499	down	1.59731e-12	2.53873e-11
27010	TPK1	thiamin pyrophosphokinase 1	5.39954	5.24374	5.18074	3.78543	3.90533	3.86759	-2.67936	-1.42189	2.67936	down	2.67842e-10	1.95496e-09
100913187	APOBEC3A_B	APOBEC3A and APOBEC3B deletion hybrid	8.98244	9.02645	9.05138	6.37065	6.74229	6.76715	-5.25392	-2.39339	5.25392	down	9.87451e-14	2.68316e-12
93	ACVR2B	activin A receptor type IIB	5.74813	5.35296	5.70202	6.78068	6.74962	6.82244	2.27081	1.18321	2.27081	up	4.62169e-09	2.40054e-08
6867	TACC1	transforming, acidic coiled-coil containing protein 1	10.5594	10.5072	10.5029	9.42351	9.51723	9.51637	-2.05256	-1.03742	2.05256	down	4.92565e-14	1.52935e-12
79980	DSN1	DSN1 homolog, MIS12 kinetochore complex component	9.87299	9.76849	9.70202	8.05204	8.12038	8.13994	-3.19773	-1.67705	3.19773	down	3.1544e-15	1.74673e-13
56204	FAM214A	family with sequence similarity 214 member A	8.1686	8.11257	8.13101	9.57773	9.66119	9.69526	2.84284	1.50733	2.84284	up	1.84849e-15	1.15422e-13
50804	MYEF2	myelin expression factor 2	6.3105	6.26387	6.27494	4.37655	3.88445	4.22578	-4.34948	-2.12084	4.34948	down	2.06668e-11	2.13474e-10
132660	LIN54	lin-54 DREAM MuvB core complex component	6.10091	5.70968	5.74247	4.71401	4.87429	4.78698	-2.08386	-1.05926	2.08386	down	7.04163e-08	2.74809e-07
5886	RAD23A	RAD23 homolog A, nucleotide excision repair protein	10.1495	10.1213	10.1404	9.09906	9.03816	9.02909	-2.11646	-1.08165	2.11646	down	1.10296e-14	4.65205e-13
1073	CFL2	cofilin 2 (muscle)	9.88208	9.8392	9.84257	7.74271	7.77675	7.84781	-4.18587	-2.06553	4.18587	down	1.81739e-17	3.52772e-15
8038	ADAM12	ADAM metallopeptidase domain 12	9.34215	9.38805	9.33798	5.93285	5.98192	5.90689	-10.6701	-3.41551	10.6701	down	1.85661e-19	2.42659e-16
4435	CITED1	Cbp/p300-interacting transactivator, with Glu/Asp rich carboxy-terminal domain, 1	4.30745	4.32444	4.21988	5.576	5.4715	5.27438	2.22947	1.1567	2.22947	up	6.19235e-09	3.10647e-08
5210	PFKFB4	6-phosphofructo-2-kinase/fructose-2,6-biphosphatase 4	5.6579	5.84453	5.99761	7.05748	7.07388	7.26978	2.46291	1.30037	2.46291	up	6.22405e-10	4.07421e-09
641	BLM	Bloom syndrome, RecQ helicase-like	7.19213	7.20128	7.21229	5.15599	5.32324	5.29959	-3.84316	-1.94229	3.84316	down	9.33122e-14	2.55154e-12
285203	EOGT	EGF domain-specific O-linked N-acetylglucosamine (GlcNAc) transferase	7.38479	7.49419	7.4079	6.28045	6.43207	6.30149	-2.13015	-1.09096	2.13015	down	4.87292e-11	4.45378e-10
55320	MIS18BP1	MIS18 binding protein 1	8.10569	7.93903	7.82793	6.30436	6.30756	6.16415	-3.24644	-1.69886	3.24644	down	1.20397e-12	2.02434e-11
80119	PIF1	PIF1 5'-to-3' DNA helicase	7.65472	7.80549	7.84922	5.38972	5.13909	5.26751	-5.67402	-2.50437	5.67402	down	1.86299e-14	6.98356e-13
105376843	SNHG25	small nucleolar RNA host gene 25	4.71695	4.99246	5.0337	3.84976	3.72331	3.44579	-2.36431	-1.24142	2.36431	down	5.34809e-08	2.14241e-07
2055	CLN8	ceroid-lipofuscinosis, neuronal 8	6.84899	6.7841	6.69359	7.87633	7.98363	7.90071	2.21095	1.14466	2.21095	up	7.15721e-12	8.74795e-11
9258	MFHAS1	malignant fibrous histiocytoma amplified sequence 1	8.58946	8.67189	8.67189	7.41856	7.54612	7.44324	-2.2581	-1.17511	2.2581	down	5.66153e-13	1.08871e-11
195828	ZNF367	zinc finger protein 367	8.10755	8.1293	7.96297	4.8799	5.11509	5.01893	-8.3511	-3.06197	8.3511	down	7.39582e-16	5.63087e-14
5494	PPM1A	protein phosphatase, Mg2+/Mn2+ dependent 1A	7.19311	7.06099	6.90746	6.00092	5.90394	5.81679	-2.21397	-1.14664	2.21397	down	8.13098e-10	5.17558e-09
900	CCNG1	cyclin G1	9.87456	9.96342	9.77024	8.77796	8.78664	8.79952	-2.11604	-1.08137	2.11604	down	7.24075e-13	1.33291e-11
10766	TOB2	transducer of ERBB2, 2	5.66582	5.85067	5.78839	7.13813	7.09998	7.13373	2.55913	1.35565	2.55913	up	7.41324e-12	9.01732e-11
7407	VARS	valyl-tRNA synthetase	6.95774	7.15489	7.12124	6.09101	6.06815	6.00698	-2.03154	-1.02258	2.03154	down	3.94931e-10	2.74367e-09
10217	CTDSPL	CTD small phosphatase like	8.144	8.16682	8.19395	6.99755	7.07316	7.00612	-2.20786	-1.14265	2.20786	down	5.59896e-13	1.07986e-11
6491	STIL	SCL/TAL1 interrupting locus	7.73797	7.74917	7.85914	5.4062	5.52171	5.54393	-4.89558	-2.29148	4.89558	down	4.6469e-15	2.33596e-13
90317	ZNF616	zinc finger protein 616	5.06778	5.21416	5.21822	6.26393	6.4507	6.2932	2.24891	1.16922	2.24891	up	6.93116e-10	4.48466e-09
83990	BRIP1	BRCA1 interacting protein C-terminal helicase 1	5.38122	5.51712	5.05936	3.48616	3.50847	3.79811	-3.29814	-1.72165	3.29814	down	1.47526e-09	8.75244e-09
112939	NACC1	nucleus accumbens associated 1, BEN and BTB (POZ) domain containing	7.49732	7.57167	7.48679	6.50837	6.49176	6.43768	-2.05526	-1.03932	2.05526	down	1.65771e-11	1.77301e-10
153222	CREBRF	CREB3 regulatory factor	5.29902	5.16475	4.99623	6.46286	6.36867	6.44664	2.41617	1.27272	2.41617	up	4.91568e-10	3.32431e-09
51100	SH3GLB1	SH3-domain GRB2-like endophilin B1	8.26351	8.30702	8.31444	6.05423	5.98998	6.08796	-4.75991	-2.25093	4.75991	down	3.03436e-16	2.86692e-14
63931	MRPS14	mitochondrial ribosomal protein S14	6.31264	5.94201	6.16396	4.4444	4.49952	4.58547	-3.09457	-1.62974	3.09457	down	1.23648e-10	9.95121e-10
1964	EIF1AX	eukaryotic translation initiation factor 1A, X-linked	8.45568	8.34499	8.27631	5.08576	5.19023	5.24349	-9.09979	-3.18583	9.09979	down	8.89112e-17	1.12822e-14
2317	FLNB	filamin B, beta	10.1593	10.1665	10.1316	8.08181	8.00449	8.03913	-4.31892	-2.11067	4.31892	down	3.46407e-18	1.2694e-15
54480	CHPF2	chondroitin polymerizing factor 2	8.79585	8.8284	9.00246	10.0227	10.0084	10.0516	2.22219	1.15198	2.22219	up	8.78767e-13	1.56691e-11
3070	HELLS	helicase, lymphoid-specific	6.74033	6.8003	6.91595	5.76866	5.81339	5.78022	-2.04406	-1.03144	2.04406	down	3.35956e-10	2.38379e-09
5926	ARID4A	AT-rich interaction domain 4A	6.0115	6.09652	6.14628	7.32162	7.43132	7.47339	2.50361	1.32401	2.50361	up	6.10556e-12	7.68043e-11
6347	CCL2	chemokine (C-C motif) ligand 2	6.01241	6.1424	6.09414	3.98451	4.35442	4.16109	-3.77456	-1.91631	3.77456	down	1.68827e-11	1.8003e-10
27230	SERP1	stress-associated endoplasmic reticulum protein 1	7.64532	7.65234	7.59938	9.17812	9.18851	9.16667	2.91889	1.54542	2.91889	up	6.10225e-16	4.82398e-14
64787	EPS8L2	EPS8-like 2	5.72263	5.84174	5.65617	7.21194	7.35229	7.23025	2.87716	1.52465	2.87716	up	3.14835e-12	4.44054e-11
119392	SFR1	SWI5-dependent homologous recombination repair protein 1	7.57604	7.5761	7.71172	6.50044	6.70051	6.5577	-2.04921	-1.03507	2.04921	down	1.93683e-10	1.47692e-09
3182	HNRNPAB	heterogeneous nuclear ribonucleoprotein A/B	11.3373	11.4224	11.3227	10.166	10.2275	10.2064	-2.23589	-1.16085	2.23589	down	5.6036e-15	2.7314e-13
131583	FAM43A	family with sequence similarity 43 member A	3.40628	3.22078	3.50785	5.46901	5.31248	5.76601	4.40008	2.13753	4.40008	up	5.41366e-11	4.87976e-10
55612	FERMT1	fermitin family member 1	6.80444	6.67915	6.65867	5.3188	5.44443	5.28776	-2.57354	-1.36376	2.57354	down	3.21128e-11	3.09904e-10
25827	FBXL2	F-box and leucine-rich repeat protein 2	5.35296	5.17667	5.41522	6.23731	6.50185	6.43789	2.11023	1.0774	2.11023	up	8.09479e-09	3.93353e-08
100288637	LOC100288637	OTU deubiquitinase 7A pseudogene	8.47355	8.44882	8.39128	6.28596	6.3501	6.20032	-4.46633	-2.15909	4.46633	down	9.41461e-16	6.86147e-14
1445	CSK	c-src tyrosine kinase	7.89548	7.99567	7.97736	6.88234	6.93095	6.80439	-2.11933	-1.08361	2.11933	down	7.14031e-12	8.73274e-11
79960	JADE1	jade family PHD finger 1	8.94467	8.98234	8.98622	7.90121	7.95395	7.93508	-2.05765	-1.041	2.05765	down	1.27477e-13	3.29491e-12
1121	CHM	choroideremia (Rab escort protein 1)	5.03636	4.97397	4.57116	3.37662	3.74554	3.52479	-2.48202	-1.31151	2.48202	down	8.18757e-08	3.15389e-07
134553	C5orf24	chromosome 5 open reading frame 24	6.09053	6.20195	6.38217	7.40233	7.27128	7.3775	2.18175	1.12549	2.18175	up	4.66235e-10	3.1749e-09
140606	SELM	selenoprotein M	8.99566	9.12954	9.09813	10.3693	10.3023	10.3605	2.41098	1.26962	2.41098	up	1.53292e-14	5.97578e-13
145508	CEP128	centrosomal protein 128kDa	6.11157	5.99062	5.93153	3.31505	3.64339	3.51194	-5.74025	-2.52111	5.74025	down	5.30625e-13	1.03203e-11
256471	MFSD8	major facilitator superfamily domain containing 8	6.74162	6.69168	6.63658	7.8642	7.8443	7.82037	2.22375	1.153	2.22375	up	1.75179e-12	2.73548e-11
84196	USP48	ubiquitin specific peptidase 48	7.53429	7.41588	7.39923	6.12161	6.08127	6.12052	-2.53503	-1.342	2.53503	down	1.87321e-12	2.89281e-11
79802	HHIPL2	HHIP-like 2	8.28411	8.2094	8.32956	9.2971	9.26553	9.28458	2.01119	1.00805	2.01119	up	3.78227e-13	7.93913e-12
80010	RMI1	RecQ mediated genome instability 1	7.72452	7.69216	7.70652	6.00177	6.063	6.12775	-3.12436	-1.64356	3.12436	down	6.32875e-14	1.8602e-12
7112	TMPO	thymopoietin	7.64065	7.58978	7.81271	5.2445	5.26054	5.24985	-5.38676	-2.42942	5.38676	down	5.94115e-15	2.85131e-13
1058	CENPA	centromere protein A	9.2146	9.22829	9.21931	6.3916	6.23272	6.28915	-7.54878	-2.91624	7.54878	down	4.80351e-18	1.53127e-15
81875	ISG20L2	interferon stimulated exonuclease gene 20kDa like 2	8.41519	8.42786	8.57903	6.8155	6.97668	6.96812	-2.93615	-1.55393	2.93615	down	3.02339e-13	6.61535e-12
81620	CDT1	chromatin licensing and DNA replication factor 1	8.6976	8.56901	8.70869	6.0029	6.05952	5.61883	-6.79599	-2.76468	6.79599	down	7.11968e-14	2.05025e-12
11339	OIP5	Opa interacting protein 5	8.87014	8.77318	8.87447	6.82847	6.67255	6.88051	-4.12793	-2.04542	4.12793	down	4.54628e-15	2.29716e-13
54443	ANLN	anillin actin binding protein	10.1988	10.2483	10.1874	7.74336	7.78916	7.70999	-5.51744	-2.464	5.51744	down	8.31035e-19	4.7919e-16
1184	CLCN5	chloride channel, voltage-sensitive 5	5.15806	5.12399	4.96572	6.05673	6.05673	6.1437	2.00434	1.00313	2.00434	up	4.15229e-09	2.18099e-08
9493	KIF23	kinesin family member 23	8.98173	9.06451	9.00853	7.00532	7.1126	7.03566	-3.90971	-1.96706	3.90971	down	3.01516e-16	2.85566e-14
137886	UBXN2B	UBX domain protein 2B	8.77555	8.749	8.79976	6.59353	6.42162	6.47399	-4.85136	-2.27839	4.85136	down	3.04314e-16	2.86831e-14
1364	CLDN4	claudin 4	3.73731	3.7221	3.71196	6.34868	6.90216	6.74256	7.67771	2.94068	7.67771	up	6.99643e-13	1.29768e-11
55183	RIF1	replication timing regulatory factor 1	7.67212	7.82889	7.61577	6.59059	6.37109	6.40974	-2.37587	-1.24845	2.37587	down	6.95148e-11	6.03693e-10
5101	PCDH9	protocadherin 9	8.75905	8.76828	8.72997	9.7548	9.78383	9.86192	2.0673	1.04775	2.0673	up	8.18078e-14	2.28468e-12
283459	GATC	glutamyl-tRNA(Gln) amidotransferase, subunit C	7.29102	7.21367	7.21243	6.0694	6.16039	6.12467	-2.17481	-1.12089	2.17481	down	1.8552e-11	1.95072e-10
6717	SRI	sorcin	7.96407	7.83755	7.95326	6.85526	6.85169	6.92702	-2.05666	-1.0403	2.05666	down	1.20985e-11	1.36395e-10
51135	IRAK4	interleukin 1 receptor associated kinase 4	7.18971	7.1662	7.14605	4.98914	5.37885	5.29134	-3.85717	-1.94754	3.85717	down	4.55276e-12	6.03291e-11
57016	AKR1B10	aldo-keto reductase family 1, member B10 (aldose reductase)	8.30618	8.29163	8.19584	6.93616	7.01872	6.96649	-2.44657	-1.29076	2.44657	down	2.70815e-13	6.04707e-12
113146	AHNAK2	AHNAK nucleoprotein 2	8.70638	8.77065	8.78556	10.3801	10.3222	10.3538	3.02691	1.59785	3.02691	up	1.15578e-16	1.38165e-14
114926	SMIM19	small integral membrane protein 19	9.40844	9.45209	9.43428	8.28413	8.32147	8.2752	-2.20076	-1.138	2.20076	down	1.41808e-14	5.64454e-13
9411	ARHGAP29	Rho GTPase activating protein 29	8.72286	8.69143	8.80132	7.57639	7.49779	7.58273	-2.27558	-1.18623	2.27558	down	2.60406e-13	5.88602e-12
26232	FBXO2	F-box protein 2	5.085	4.61174	5.11098	8.71431	8.82402	8.83376	14.468	3.85479	14.468	up	4.70793e-15	2.36059e-13
253461	ZBTB38	zinc finger and BTB domain containing 38	10.6909	10.6469	10.5703	9.13801	9.15432	9.08411	-2.84919	-1.51055	2.84919	down	7.02154e-16	5.39832e-14
283687	ST20-AS1	ST20 antisense RNA 1	5.36889	5.10974	4.96397	6.39194	6.22767	6.33872	2.2531	1.17191	2.2531	up	9.93261e-09	4.71898e-08
715	C1R	complement component 1, r subcomponent	6.85262	6.89087	6.98829	7.96677	8.02745	8.04757	2.14851	1.10334	2.14851	up	4.66979e-12	6.16506e-11
586	BCAT1	branched chain amino-acid transaminase 1, cytosolic	10.2244	10.2376	10.0733	8.09275	8.11331	8.20584	-4.1157	-2.04114	4.1157	down	4.01685e-16	3.5314e-14
29980	DONSON	downstream neighbor of SON	9.09074	9.09462	8.89332	7.449	7.4641	7.44553	-2.97595	-1.57335	2.97595	down	5.52446e-14	1.67141e-12
11343	MGLL	monoglyceride lipase	9.81438	9.77431	9.91467	8.57511	8.6319	8.62601	-2.33504	-1.22345	2.33504	down	4.20595e-14	1.3386e-12
8732	RNGTT	RNA guanylyltransferase and 5'-phosphatase	7.24165	7.24165	7.38532	5.72079	5.8527	6.12315	-2.62199	-1.39066	2.62199	down	3.80008e-10	2.65221e-09
28984	RGCC	regulator of cell cycle	6.11753	6.09987	6.17823	4.84622	4.73306	5.05505	-2.38463	-1.25377	2.38463	down	1.18417e-09	7.20309e-09
27034	ACAD8	acyl-CoA dehydrogenase family member 8	7.00476	7.17362	7.15918	8.19188	8.21034	8.28162	2.16659	1.11543	2.16659	up	7.62455e-12	9.22996e-11
25999	CLIP3	CAP-Gly domain containing linker protein 3	7.39135	7.49546	7.42668	8.49209	8.38859	8.50125	2.03188	1.02281	2.03188	up	4.25831e-12	5.71809e-11
57568	SIPA1L2	signal-induced proliferation-associated 1 like 2	8.08707	8.07076	8.14669	9.68557	9.739	9.73131	3.06762	1.61712	3.06762	up	2.48634e-16	2.44948e-14
157769	FAM91A1	family with sequence similarity 91 member A1	9.19863	9.10468	9.16572	8.2578	8.074	8.13224	-2.00231	-1.00166	2.00231	down	7.01195e-12	8.61337e-11
8886	DDX18	DEAD (Asp-Glu-Ala-Asp) box polypeptide 18	8.57356	8.60115	8.56612	7.56149	7.48945	7.58492	-2.0491	-1.03499	2.0491	down	7.13567e-13	1.31728e-11
8649	LAMTOR3	late endosomal/lysosomal adaptor, MAPK and MTOR activator 3	6.83335	6.68771	6.74868	5.33313	5.2044	5.03593	-2.95965	-1.56543	2.95965	down	2.96777e-11	2.90118e-10
23253	ANKRD12	ankyrin repeat domain 12	6.99186	7.04384	6.95655	8.38567	8.37291	8.38373	2.60874	1.38335	2.60874	up	2.92984e-14	1.00419e-12
57534	MIB1	mindbomb E3 ubiquitin protein ligase 1	6.3302	6.30601	6.38957	5.05159	5.35256	5.06773	-2.27306	-1.18463	2.27306	down	2.05448e-09	1.17446e-08
25875	LETMD1	LETM1 domain containing 1	7.09737	7.1428	7.27956	5.54934	6.02912	5.85635	-2.56977	-1.36164	2.56977	down	2.24405e-09	1.26932e-08
51474	LIMA1	LIM domain and actin binding 1	10.5197	10.5792	10.4828	7.89979	7.8995	7.96443	-6.08818	-2.60601	6.08818	down	4.86941e-19	3.78333e-16
8613	PLPP3	phospholipid phosphatase 3	8.41919	8.51277	8.47055	6.86722	6.99609	7.00859	-2.8485	-1.5102	2.8485	down	6.27742e-14	1.85066e-12
55329	MNS1	meiosis specific nuclear structural 1	7.22499	7.18402	7.0485	5.28091	5.46876	5.47441	-3.35073	-1.74448	3.35073	down	1.89492e-12	2.92316e-11
3998	LMAN1	lectin, mannose-binding, 1	7.76779	7.70901	7.80093	8.90482	8.92051	8.94872	2.24302	1.16544	2.24302	up	7.16375e-14	2.0563e-12
55917	CTTNBP2NL	CTTNBP2 N-terminal like	6.45726	6.52552	6.62921	5.45142	5.45142	5.56877	-2.06593	-1.04679	2.06593	down	9.06686e-10	5.68636e-09
80178	C16orf59	chromosome 16 open reading frame 59	6.21199	6.48623	6.12808	5.10264	5.01787	5.25334	-2.2204	-1.15082	2.2204	down	1.31514e-08	6.05597e-08
151473	SLC16A14	solute carrier family 16 member 14	5.36773	5.54356	5.56378	3.94821	4.32278	4.65899	-2.26843	-1.1817	2.26843	down	8.0158e-07	2.55258e-06
4711	NDUFB5	NADH:ubiquinone oxidoreductase subunit B5	9.75272	9.82953	9.60377	7.65778	7.53761	7.497	-4.48324	-2.16454	4.48324	down	2.44398e-15	1.4432e-13
56062	KLHL4	kelch like family member 4	5.38484	5.31118	5.21862	3.80127	3.69778	3.82904	-2.88556	-1.52885	2.88556	down	7.10062e-11	6.14468e-10
55355	HJURP	Holliday junction recognition protein	9.97317	10.0136	9.94775	7.52685	7.56108	7.39383	-5.5955	-2.48427	5.5955	down	1.63057e-17	3.27529e-15
84191	FAM96A	family with sequence similarity 96 member A	9.1591	9.20329	9.15659	7.76921	7.84134	7.85337	-2.5521	-1.35169	2.5521	down	7.36244e-15	3.36459e-13
23642	SNHG1	small nucleolar RNA host gene 1	8.89763	8.75271	8.55412	7.70762	7.67371	7.62279	-2.09475	-1.06678	2.09475	down	3.14941e-10	2.25344e-09
8345	HIST1H2BH	histone cluster 1, H2bh	5.13083	5.24671	5.52807	4.18214	4.07112	3.99633	-2.32733	-1.21867	2.32733	down	1.7634e-08	7.88762e-08
144363	LYRM5	LYR motif containing 5	7.32106	7.30294	7.12449	5.98295	5.9558	5.96277	-2.4323	-1.28232	2.4323	down	1.60029e-11	1.72336e-10
92565	FANK1	fibronectin type III and ankyrin repeat domains 1	4.59085	4.74235	4.63153	6.07016	6.06689	5.99366	2.61835	1.38866	2.61835	up	5.54313e-11	4.98043e-10
112770	GLMP	glycosylated lysosomal membrane protein	8.73288	8.72293	8.75174	9.90056	9.90845	9.86599	2.2281	1.15582	2.2281	up	3.76041e-15	1.9818e-13
26994	RNF11	ring finger protein 11	7.86424	7.83669	7.94416	6.74868	6.8115	6.89608	-2.08919	-1.06294	2.08919	down	1.61644e-11	1.73756e-10
7485	WRB	tryptophan rich basic protein	9.88774	9.8382	9.92955	8.56119	8.40161	8.48515	-2.64362	-1.40251	2.64362	down	1.78443e-14	6.74059e-13
55133	SRBD1	S1 RNA binding domain 1	7.24891	7.13684	7.17539	5.9037	6.05607	6.11108	-2.23989	-1.16343	2.23989	down	8.87157e-11	7.45505e-10
91851	CHRDL1	chordin-like 1	7.19218	7.29459	7.27956	6.16356	6.18724	6.24573	-2.08002	-1.0566	2.08002	down	4.04407e-11	3.78715e-10
63979	FIGNL1	fidgetin-like 1	8.58256	8.5482	8.62252	7.32899	7.23382	7.44965	-2.37337	-1.24694	2.37337	down	1.72498e-12	2.70762e-11
2992	GYG1	glycogenin 1	9.74117	9.68659	9.60409	8.56072	8.55698	8.6061	-2.14754	-1.10268	2.14754	down	1.39874e-13	3.54752e-12
51447	IP6K2	inositol hexakisphosphate kinase 2	8.83221	8.88315	8.89846	10.3935	10.4277	10.4936	2.9629	1.56701	2.9629	up	2.68501e-16	2.59949e-14
23008	KLHDC10	kelch domain containing 10	8.76431	8.77417	8.8429	7.7471	7.68726	7.7066	-2.11424	-1.08014	2.11424	down	2.5232e-13	5.71878e-12
101929530	FANCD2P2	Fanconi anemia complementation group D2 pseudogene 2	6.38477	6.45886	6.33461	3.87975	3.8198	3.84262	-5.83752	-2.54536	5.83752	down	1.85889e-14	6.97483e-13
114898	C1QTNF2	C1q and tumor necrosis factor related protein 2	5.76781	5.63908	6.00676	4.5592	4.8367	4.58561	-2.21	-1.14405	2.21	down	3.89862e-08	1.6125e-07
54069	MIS18A	MIS18 kinetochore protein A	7.96885	8.00986	7.959	6.7753	6.91044	6.99825	-2.12075	-1.08457	2.12075	down	2.91814e-11	2.85979e-10
57488	ESYT2	extended synaptotagmin-like protein 2	8.68109	8.57843	8.73709	9.74105	9.83351	9.8735	2.21988	1.15048	2.21988	up	6.06652e-13	1.14968e-11
10346	TRIM22	tripartite motif containing 22	7.33305	7.23077	7.44423	8.70652	8.7	8.66919	2.55954	1.35589	2.55954	up	3.77748e-13	7.93757e-12
1116	CHI3L1	chitinase 3 like 1	8.25789	8.37976	8.30418	11.9087	11.9312	11.9128	12.1562	3.60362	12.1562	up	2.29874e-21	3.60996e-17
55164	SHQ1	SHQ1, H/ACA ribonucleoprotein assembly factor	7.17779	7.18803	7.04666	5.20887	5.25681	5.01293	-3.93935	-1.97796	3.93935	down	6.02568e-13	1.1436e-11
23344	ESYT1	extended synaptotagmin-like protein 1	9.94142	9.93379	9.99555	8.76111	8.76924	8.73407	-2.30076	-1.20211	2.30076	down	3.45129e-15	1.85916e-13
5783	PTPN13	protein tyrosine phosphatase, non-receptor type 13 (APO-1/CD95 (Fas)-associated phosphatase)	7.04399	7.07693	6.76774	8.0638	8.05631	8.0135	2.11646	1.08165	2.11646	up	4.02003e-10	2.78638e-09
51200	CPA4	carboxypeptidase A4	11.124	11.164	11.1212	9.86659	9.87647	9.93306	-2.36913	-1.24436	2.36913	down	6.3242e-16	4.96125e-14
728113	ANXA8L1	annexin A8-like 1	5.33445	5.69956	5.45618	4.24644	4.29303	4.79653	-2.07254	-1.0514	2.07254	down	2.15265e-06	6.31968e-06
5376	PMP22	peripheral myelin protein 22	9.42677	9.45916	9.4379	6.57993	6.63555	6.65177	-7.05605	-2.81886	7.05605	down	6.84409e-19	4.19308e-16
169200	TMEM64	transmembrane protein 64	5.64009	5.7953	5.95773	4.54934	4.72905	4.43468	-2.34028	-1.22668	2.34028	down	8.9187e-09	4.29346e-08
5636	PRPSAP2	phosphoribosyl pyrophosphate synthetase-associated protein 2	8.30506	8.29485	8.32859	7.18254	7.30515	7.35881	-2.03825	-1.02733	2.03825	down	9.15756e-12	1.07764e-10
29946	SERTAD3	SERTA domain containing 3	7.5959	7.69713	7.63951	8.82777	8.79151	8.75128	2.213	1.14601	2.213	up	2.1028e-13	4.94309e-12
26259	FBXW8	F-box and WD repeat domain containing 8	7.8182	7.88075	7.87145	6.28566	6.37179	6.27058	-2.92301	-1.54746	2.92301	down	7.61967e-14	2.15716e-12
84131	CEP78	centrosomal protein 78kDa	7.69746	7.68647	7.57377	6.19752	6.57155	6.33886	-2.43388	-1.28326	2.43388	down	2.89785e-10	2.09254e-09
92979	MARCH9	membrane associated ring-CH-type finger 9	6.79985	6.8853	6.95168	8.01103	8.00766	8.02634	2.19781	1.13607	2.19781	up	2.68314e-12	3.86929e-11
55847	CISD1	CDGSH iron sulfur domain 1	5.21961	5.11029	4.90937	4.06126	3.85186	4.0754	-2.11929	-1.08358	2.11929	down	4.66431e-08	1.89599e-07
166929	SGMS2	sphingomyelin synthase 2	8.42052	8.29621	8.21708	7.07618	7.09725	7.16192	-2.29658	-1.19949	2.29658	down	3.8492e-12	5.27349e-11
10352	WARS2	tryptophanyl tRNA synthetase 2, mitochondrial	6.7352	6.83406	6.85227	5.60219	5.67156	5.66993	-2.23346	-1.15928	2.23346	down	5.61631e-11	5.0335e-10
3835	KIF22	kinesin family member 22	7.39443	7.34632	7.42653	5.43215	5.54544	5.48677	-3.73465	-1.90097	3.73465	down	3.90565e-14	1.26562e-12
80155	NAA15	N(alpha)-acetyltransferase 15, NatA auxiliary subunit	6.99118	7.12033	7.0543	5.61599	5.70393	5.64493	-2.6396	-1.40032	2.6396	down	3.67523e-12	5.07236e-11
84910	TMEM87B	transmembrane protein 87B	6.63946	6.60666	6.6946	8.63129	8.57157	8.61823	3.89095	1.96012	3.89095	up	4.59717e-16	3.94431e-14
1854	DUT	deoxyuridine triphosphatase	9.00026	8.9995	9.08613	7.23764	7.32321	7.29265	-3.34993	-1.74413	3.34993	down	9.74391e-16	7.03607e-14
3842	TNPO1	transportin 1	10.2256	10.3326	10.0378	8.85527	8.88037	8.90645	-2.49319	-1.31799	2.49319	down	1.86909e-12	2.88987e-11
6769	STAC	SH3 and cysteine rich domain	8.95896	9.0353	8.98975	7.77902	7.84625	7.81861	-2.26584	-1.18004	2.26584	down	5.17504e-14	1.58986e-12
79796	ALG9	ALG9, alpha-1,2-mannosyltransferase	5.48775	5.34537	5.66244	4.4383	4.35224	4.31498	-2.18861	-1.13001	2.18861	down	9.37615e-09	4.48559e-08
3604	TNFRSF9	tumor necrosis factor receptor superfamily member 9	6.86622	6.8813	6.95223	5.41833	5.59612	5.55121	-2.59913	-1.37803	2.59913	down	1.32748e-11	1.47493e-10
283991	UBALD2	UBA-like domain containing 2	7.87133	8.00168	8.03314	6.359	6.21016	6.43801	-3.10156	-1.63299	3.10156	down	8.42399e-13	1.51377e-11
260425	MAGI3	membrane associated guanylate kinase, WW and PDZ domain containing 3	7.0336	7.14048	7.10612	6.08983	5.8342	6.1113	-2.11642	-1.08162	2.11642	down	1.19382e-09	7.25509e-09
5295	PIK3R1	phosphoinositide-3-kinase regulatory subunit 1	5.95986	5.76141	5.76192	6.82323	6.90834	6.82109	2.03236	1.02316	2.03236	up	9.35762e-10	5.84721e-09
154214	RNF217	ring finger protein 217	5.31351	5.07068	5.17203	6.32181	6.35393	6.35944	2.23404	1.15965	2.23404	up	5.94483e-10	3.91496e-09
667	DST	dystonin	8.30912	8.33718	8.30258	9.33497	9.33717	9.3025	2.01194	1.00859	2.01194	up	6.24154e-14	1.84424e-12
9020	MAP3K14	mitogen-activated protein kinase kinase kinase 14	6.74683	6.71991	6.74472	5.33754	5.55651	5.20243	-2.58768	-1.37166	2.58768	down	2.26353e-10	1.69086e-09
90417	KNSTRN	kinetochore-localized astrin/SPAG5 binding protein	10.0675	10.1574	10.0878	8.26444	8.33865	8.37058	-3.43346	-1.77966	3.43346	down	1.74002e-16	1.8847e-14
54972	TMEM132A	transmembrane protein 132A	6.79288	6.90532	6.87499	7.9141	7.90874	7.82587	2.0352	1.02517	2.0352	up	1.24964e-11	1.40195e-10
23114	NFASC	neurofascin	6.84563	6.90276	6.78306	5.75978	5.83237	5.8603	-2.03684	-1.02633	2.03684	down	2.33878e-10	1.74077e-09
89797	NAV2	neuron navigator 2	8.42019	8.38107	8.31919	6.89538	6.95887	6.98857	-2.68678	-1.42588	2.68678	down	5.5777e-14	1.68491e-12
8334	HIST1H2AC	histone cluster 1, H2ac	7.71048	7.75983	7.86071	9.47119	9.49627	9.42416	3.21957	1.68687	3.21957	up	1.91621e-15	1.18884e-13
84833	USMG5	up-regulated during skeletal muscle growth 5 homolog (mouse)	11.7761	11.8241	11.7785	8.88934	8.88134	8.90914	-7.46228	-2.89962	7.46228	down	3.82595e-21	3.75039e-17
286144	TRIQK	triple QxxK/R motif containing	7.25792	7.28446	7.28263	5.62664	5.64049	5.85581	-2.96361	-1.56736	2.96361	down	3.01391e-12	4.26346e-11
157570	ESCO2	establishment of sister chromatid cohesion N-acetyltransferase 2	8.45839	8.36526	8.29949	5.76211	5.88427	5.67182	-6.06979	-2.60165	6.06979	down	1.18022e-15	8.11867e-14
27244	SESN1	sestrin 1	7.18057	7.11846	7.17318	9.74665	9.73153	9.65565	5.87209	2.55387	5.87209	up	2.25031e-18	9.51714e-16
55835	CENPJ	centromere protein J	6.20255	6.30772	6.20287	4.9427	5.17289	4.97292	-2.31051	-1.20821	2.31051	down	6.80347e-10	4.4137e-09
5396	PRRX1	paired related homeobox 1	10.4192	10.4213	10.4808	9.46409	9.4195	9.43102	-2.00307	-1.00221	2.00307	down	2.05673e-14	7.6008e-13
116064	LRRC58	leucine rich repeat containing 58	9.59407	9.8091	9.46478	7.90143	7.94047	7.91862	-3.25459	-1.70248	3.25459	down	3.9345e-13	8.20159e-12
10376	TUBA1B	tubulin, alpha 1b	12.9831	13.0722	12.9711	11.7406	11.7888	11.7823	-2.35907	-1.23822	2.35907	down	9.5471e-16	6.91944e-14
64581	CLEC7A	C-type lectin domain family 7, member A	3.58735	3.3293	3.61747	5.36981	5.44603	5.40826	3.7235	1.89666	3.7235	up	1.52538e-11	1.65496e-10
91860	CALML4	calmodulin like 4	6.74221	6.89356	6.87693	5.50894	5.45546	5.44921	-2.5782	-1.36636	2.5782	down	1.15133e-11	1.30662e-10
11064	CNTRL	centriolin	6.45994	6.43281	6.51234	4.83019	4.82474	4.91313	-3.05748	-1.61234	3.05748	down	2.51218e-12	3.67821e-11
26147	PHF19	PHD finger protein 19	8.71369	8.71025	8.87615	7.46302	7.56693	7.5596	-2.35683	-1.23685	2.35683	down	1.20177e-12	2.02237e-11
92181	UBTD2	ubiquitin domain containing 2	6.54963	6.55774	6.72731	7.60299	7.62505	7.67887	2.03366	1.02408	2.03366	up	8.43188e-11	7.13453e-10
7105	TSPAN6	tetraspanin 6	7.68839	7.73071	7.75624	9.00636	9.03111	9.06424	2.47734	1.30879	2.47734	up	1.03307e-14	4.46109e-13
2074	ERCC6	excision repair cross-complementation group 6	6.31731	6.20029	6.34171	7.87736	7.84472	7.78054	2.92365	1.54777	2.92365	up	2.06997e-13	4.88054e-12
54921	CHTF8	chromosome transmission fidelity factor 8	9.96584	9.92751	10.0418	8.59084	8.59381	8.62374	-2.59472	-1.37558	2.59472	down	2.38003e-15	1.41182e-13
9550	ATP6V1G1	ATPase, H+ transporting, lysosomal 13kDa, V1 subunit G1	10.3878	10.4844	10.4469	11.4917	11.4736	11.4536	2.04665	1.03326	2.04665	up	1.0453e-14	4.49903e-13
10714	POLD3	polymerase (DNA-directed), delta 3, accessory subunit	7.47835	7.5094	7.57167	5.95798	5.94888	5.9303	-2.97747	-1.57409	2.97747	down	1.21136e-13	3.1665e-12
114788	CSMD3	CUB and Sushi multiple domains 3	3.9881	4.14336	4.29085	5.28675	5.44882	5.59726	2.46828	1.30351	2.46828	up	5.77218e-09	2.92073e-08
84062	DTNBP1	dystrobrevin binding protein 1	7.7643	7.78476	7.79893	6.7846	6.81638	6.70989	-2.01723	-1.01237	2.01723	down	9.6201e-12	1.12598e-10
11113	CIT	citron rho-interacting serine/threonine kinase	8.85965	8.77005	8.87782	7.50099	7.45701	7.46677	-2.56848	-1.36092	2.56848	down	2.25313e-14	8.1565e-13
57405	SPC25	SPC25, NDC80 kinetochore complex component	8.67491	8.64931	8.54296	5.7434	5.71863	5.89308	-7.14709	-2.83736	7.14709	down	1.38249e-16	1.58039e-14
10988	METAP2	methionyl aminopeptidase 2	6.68369	6.65098	6.42202	4.96593	5.0823	5.30516	-2.76593	-1.46777	2.76593	down	5.27619e-10	3.52976e-09
102723478	LOC102723478	coxsackievirus and adenovirus receptor pseudogene	5.23069	5.27265	5.34534	6.93469	6.86503	6.90938	3.07405	1.62014	3.07405	up	8.46484e-13	1.51902e-11
92906	HNRNPLL	heterogeneous nuclear ribonucleoprotein L-like	5.36555	5.24043	5.43258	7.25946	7.42182	7.14239	3.80625	1.92837	3.80625	up	1.24866e-12	2.08696e-11
80351	TNKS2	tankyrase, TRF1-interacting ankyrin-related ADP-ribose polymerase 2	8.59802	8.48751	8.55407	9.72451	9.723	9.83782	2.3218	1.21524	2.3218	up	8.38361e-14	2.3297e-12
54806	AHI1	Abelson helper integration site 1	5.76923	5.80483	5.66366	6.89728	6.86173	6.72316	2.11621	1.08148	2.11621	up	4.09458e-10	2.83205e-09
79801	SHCBP1	SHC SH2-domain binding protein 1	9.63639	9.57056	9.4681	7.10367	7.12602	7.07417	-5.49098	-2.45706	5.49098	down	2.42438e-17	4.40093e-15
80117	ARL14	ADP-ribosylation factor like GTPase 14	4.64575	4.5934	4.85041	3.66796	3.67993	3.42031	-2.15415	-1.10712	2.15415	down	4.51642e-08	1.8416e-07
9070	ASH2L	ash2 (absent, small, or homeotic)-like (Drosophila)	8.26214	8.32887	8.33827	6.30977	6.29041	6.2168	-4.10515	-2.03743	4.10515	down	1.03132e-15	7.36575e-14
22809	ATF5	activating transcription factor 5	6.9795	6.91252	7.06068	8.01794	8.02063	8.0274	2.05303	1.03776	2.05303	up	6.94756e-12	8.53961e-11
116151	FAM210B	family with sequence similarity 210 member B	8.30503	8.34754	8.47248	9.55525	9.58047	9.58161	2.2933	1.19743	2.2933	up	1.46041e-13	3.67303e-12
1026	CDKN1A	cyclin-dependent kinase inhibitor 1A (p21, Cip1)	10.191	10.2732	10.2257	12.0368	12.0696	12.0467	3.53342	1.82107	3.53342	up	2.41106e-18	9.84455e-16
494115	RBMXL1	RNA binding motif protein, X-linked-like 1	10.414	10.5289	10.3077	9.38635	9.36042	9.40297	-2.04719	-1.03365	2.04719	down	2.63997e-12	3.81827e-11
408186	OVOS	ovostatin	6.02499	6.34957	6.10637	3.91104	3.9492	3.94497	-4.67589	-2.22524	4.67589	down	1.23642e-12	2.07107e-11
23704	KCNE4	potassium channel, voltage gated subfamily E regulatory beta subunit 4	5.80672	5.68752	5.76416	7.39066	7.46925	7.44667	3.21034	1.68273	3.21034	up	1.37653e-13	3.50252e-12
990	CDC6	cell division cycle 6	9.85407	9.87632	9.88916	7.61132	7.61401	7.54782	-4.86397	-2.28213	4.86397	down	2.28159e-18	9.51714e-16
7351	UCP2	uncoupling protein 2 (mitochondrial, proton carrier)	7.28812	7.17362	7.41862	6.15763	6.05771	6.12416	-2.26622	-1.18029	2.26622	down	9.03729e-11	7.56678e-10
84132	USP42	ubiquitin specific peptidase 42	4.69571	4.75822	4.62032	5.796	5.825	5.66292	2.09927	1.06989	2.09927	up	3.05931e-09	1.66565e-08
905	CCNT2	cyclin T2	5.30383	5.41012	5.34065	6.58175	6.47627	6.57272	2.28477	1.19205	2.28477	up	9.12122e-11	7.62565e-10
2941	GSTA4	glutathione S-transferase alpha 4	7.59039	7.51167	7.53118	9.12163	9.08931	9.10011	2.94705	1.55927	2.94705	up	1.08414e-15	7.68699e-14
5495	PPM1B	protein phosphatase, Mg2+/Mn2+ dependent 1B	8.58441	8.64538	8.44823	7.29707	7.39129	7.3409	-2.32343	-1.21625	2.32343	down	2.06946e-12	3.13175e-11
25852	ARMC8	armadillo repeat containing 8	6.83006	6.5916	6.6447	7.66318	7.64822	7.8652	2.0516	1.03675	2.0516	up	1.13257e-09	6.92362e-09
7456	WIPF1	WAS/WASL interacting protein family member 1	8.0002	7.94145	7.80982	6.84553	6.77623	6.8046	-2.15602	-1.10837	2.15602	down	1.46739e-11	1.60179e-10
115106	HAUS1	HAUS augmin like complex subunit 1	9.06466	9.06385	9.04921	7.88184	7.92762	7.97101	-2.19226	-1.13242	2.19226	down	5.6873e-14	1.7088e-12
8653	DDX3Y	DEAD (Asp-Glu-Ala-Asp) box helicase 3, Y-linked	5.06117	4.7816	4.97427	6.44282	6.58049	6.50376	2.96907	1.57001	2.96907	up	3.47289e-11	3.31452e-10
125150	ZSWIM7	zinc finger, SWIM-type containing 7	3.70598	3.27028	3.58341	4.3459	4.57605	4.69631	2.02726	1.01953	2.02726	up	9.39972e-07	2.95252e-06
272	AMPD3	adenosine monophosphate deaminase 3	6.67704	6.66822	6.82745	7.66678	7.79206	7.78723	2.03419	1.02445	2.03419	up	8.71232e-11	7.34171e-10
81610	FAM83D	family with sequence similarity 83 member D	9.49925	9.43221	9.48451	7.11608	7.25954	7.30153	-4.74456	-2.24627	4.74456	down	1.91536e-16	2.03008e-14
1645	AKR1C1	aldo-keto reductase family 1, member C1	10.6858	10.9292	10.4268	12.0038	12.3891	12.2975	2.92722	1.54953	2.92722	up	8.33005e-10	5.28599e-09
131566	DCBLD2	discoidin, CUB and LCCL domain containing 2	11.9915	12.0238	11.8799	10.7073	10.7648	10.7758	-2.32264	-1.21577	2.32264	down	1.4391e-14	5.70548e-13
90141	EFCAB11	EF-hand calcium binding domain 11	5.29244	5.46215	5.37955	4.08658	3.96072	3.69918	-2.75596	-1.46255	2.75596	down	1.43127e-09	8.51985e-09
3918	LAMC2	laminin subunit gamma 2	5.97938	5.84403	5.87468	4.47919	4.62445	4.88491	-2.35628	-1.23651	2.35628	down	7.3686e-09	3.61832e-08
387890	TMEM233	transmembrane protein 233	7.99695	7.95156	7.96855	8.95755	8.99146	9.0084	2.01873	1.01345	2.01873	up	1.66586e-13	4.08283e-12
53349	ZFYVE1	zinc finger, FYVE domain containing 1	6.11677	6.20018	6.19031	7.39054	7.42863	7.47634	2.39953	1.26275	2.39953	up	2.55583e-12	3.72671e-11
402055	SRRD	SRR1 domain containing	8.45167	8.48936	8.4752	7.12357	7.13632	7.22988	-2.47739	-1.30882	2.47739	down	8.0972e-14	2.2678e-12
10713	USP39	ubiquitin specific peptidase 39	8.94269	8.9975	8.98026	7.5096	7.62	7.50214	-2.69366	-1.42957	2.69366	down	1.53298e-14	5.97578e-13
144203	OVOS2	ovostatin 2	6.02499	6.34957	6.10637	3.91104	3.9492	3.94497	-4.67589	-2.22524	4.67589	down	1.23642e-12	2.07107e-11
11057	ABHD2	abhydrolase domain containing 2	9.76035	9.85309	9.75326	8.75292	8.78836	8.77856	-2.02177	-1.01562	2.02177	down	1.21089e-13	3.1665e-12
9133	CCNB2	cyclin B2	9.86887	9.93718	9.84319	7.40687	7.47858	7.52106	-5.3304	-2.41424	5.3304	down	7.77155e-18	2.03828e-15
2146	EZH2	enhancer of zeste 2 polycomb repressive complex 2 subunit	9.08343	9.0643	8.92139	6.60853	6.57546	6.60017	-5.38266	-2.42832	5.38266	down	8.22003e-17	1.06371e-14
7227	TRPS1	trichorhinophalangeal syndrome I	6.44537	6.42581	6.3674	7.65682	7.59875	7.56929	2.29013	1.19543	2.29013	up	2.60262e-12	3.76841e-11
10424	PGRMC2	progesterone receptor membrane component 2	8.30482	8.25861	8.23342	7.26834	7.27089	7.21305	-2.0207	-1.01486	2.0207	down	1.73209e-12	2.7177e-11
25927	CNRIP1	cannabinoid receptor interacting protein 1	8.76554	8.73117	8.84958	6.46692	6.60787	6.64111	-4.62717	-2.21013	4.62717	down	1.10217e-15	7.78668e-14
9435	CHST2	carbohydrate (N-acetylglucosamine-6-O) sulfotransferase 2	8.31539	8.39857	8.49553	9.4001	9.40795	9.44659	2.02097	1.01505	2.02097	up	2.01407e-12	3.06567e-11
51274	KLF3	Kruppel-like factor 3 (basic)	5.63753	5.71538	5.76833	6.79686	6.87269	6.85218	2.1939	1.1335	2.1939	up	7.01203e-11	6.08143e-10
102724828	LOC102724828	39S ribosomal protein L23, mitochondrial-like	10.3079	10.3255	10.3897	9.21126	9.28169	9.23479	-2.14127	-1.09847	2.14127	down	1.82895e-14	6.88227e-13
134957	STXBP5	syntaxin binding protein 5 (tomosyn)	6.79213	6.78402	6.87592	7.90019	7.83005	7.91318	2.09041	1.06378	2.09041	up	5.82135e-12	7.37734e-11
2549	GAB1	GRB2 associated binding protein 1	4.25925	3.88752	4.32477	5.16598	5.12843	5.57095	2.19052	1.13127	2.19052	up	7.11317e-07	2.28313e-06
6745	SSR1	signal sequence receptor, alpha	8.67686	8.64929	8.6666	6.6043	6.66199	6.51798	-4.19739	-2.06949	4.19739	down	4.8666e-16	4.09518e-14
2783	GNB2	guanine nucleotide binding protein (G protein), beta polypeptide 2	9.01177	9.15037	9.15087	7.32666	7.47411	7.52581	-3.16486	-1.66214	3.16486	down	6.25819e-14	1.84777e-12
10087	COL4A3BP	collagen, type IV, alpha 3 (Goodpasture antigen) binding protein	5.43645	5.38186	5.29902	6.50726	6.60114	6.64137	2.31468	1.21081	2.31468	up	1.07448e-10	8.80097e-10
728392	LOC728392	uncharacterized LOC728392	9.34419	9.35286	9.39766	10.384	10.3535	10.3657	2.00391	1.00282	2.00391	up	1.32222e-14	5.36691e-13
136	ADORA2B	adenosine A2b receptor	10.2151	10.2136	10.2495	9.19071	9.2267	9.1918	-2.03214	-1.023	2.03214	down	1.06377e-14	4.55353e-13
8880	FUBP1	far upstream element (FUSE) binding protein 1	8.45365	8.51188	8.42949	7.3484	7.38017	7.2949	-2.17928	-1.12385	2.17928	down	4.84573e-13	9.60086e-12
5581	PRKCE	protein kinase C, epsilon	6.83648	6.81935	6.97837	5.34048	5.38856	5.72446	-2.62727	-1.39357	2.62727	down	7.50499e-10	4.82095e-09
55788	LMBRD1	LMBR1 domain containing 1	7.89834	7.89758	7.98621	6.96779	6.91709	6.70906	-2.08888	-1.06273	2.08888	down	1.75865e-10	1.3601e-09
65977	PLEKHA3	pleckstrin homology domain containing A3	9.61962	9.65232	9.61083	8.01288	8.01876	7.9848	-3.07825	-1.62211	3.07825	down	1.12581e-16	1.36607e-14
147841	SPC24	SPC24, NDC80 kinetochore complex component	8.4714	8.64016	8.52876	6.29413	6.33455	6.09879	-4.93922	-2.30428	4.93922	down	8.38906e-15	3.75926e-13
7248	TSC1	tuberous sclerosis 1	8.80005	8.84011	8.82823	9.93739	9.9208	9.8688	2.12314	1.0862	2.12314	up	1.54139e-14	5.98987e-13
23196	FAM120A	family with sequence similarity 120A	9.47164	9.53608	9.46992	8.34568	8.39479	8.30758	-2.2087	-1.1432	2.2087	down	4.13468e-14	1.32055e-12
64663	SPANXC	SPANX family member C	3.32433	3.67032	3.95257	5.18786	5.25994	5.41988	3.11699	1.64015	3.11699	up	8.01859e-09	3.90085e-08
23052	ENDOD1	endonuclease domain containing 1	7.71072	7.61301	7.71258	6.46832	6.51816	6.55422	-2.24265	-1.1652	2.24265	down	4.0705e-12	5.52264e-11
9801	MRPL19	mitochondrial ribosomal protein L19	7.65251	7.6112	7.62941	5.85758	5.82382	5.72436	-3.5532	-1.82912	3.5532	down	3.11442e-14	1.05912e-12
7283	TUBG1	tubulin, gamma 1	10.9373	10.9386	10.9747	9.84797	9.93996	9.8888	-2.08196	-1.05794	2.08196	down	1.05785e-14	4.53314e-13
55013	CCDC109B	coiled-coil domain containing 109B	6.15049	6.1417	6.11624	4.43156	4.58525	4.56191	-3.05231	-1.6099	3.05231	down	7.46801e-12	9.05724e-11
27242	TNFRSF21	tumor necrosis factor receptor superfamily member 21	10.3658	10.3935	10.3051	9.0244	9.01446	9.01001	-2.52891	-1.33852	2.52891	down	7.50149e-16	5.67825e-14
7067	THRA	thyroid hormone receptor, alpha	4.56421	4.52131	4.88531	5.73325	5.71757	5.69681	2.08339	1.05893	2.08339	up	3.43359e-08	1.43683e-07
50865	HEBP1	heme binding protein 1	9.54137	9.51821	9.62305	7.80465	7.74714	7.86586	-3.37525	-1.75499	3.37525	down	8.00465e-16	6.01269e-14
3608	ILF2	interleukin enhancer binding factor 2	10.9141	10.9977	10.9437	8.70656	8.69674	8.76467	-4.68865	-2.22917	4.68865	down	1.25949e-18	6.49796e-16
445815	PALM2-AKAP2	PALM2-AKAP2 readthrough	10.9175	10.9056	10.8973	9.72742	9.68056	9.71089	-2.29824	-1.20053	2.29824	down	4.69826e-16	4.00475e-14
10076	PTPRU	protein tyrosine phosphatase, receptor type, U	6.4663	6.56257	6.43555	7.51393	7.56949	7.60075	2.10417	1.07325	2.10417	up	1.94844e-11	2.03241e-10
793	CALB1	calbindin 1	3.26656	3.26767	3.6035	6.32238	6.38488	6.25665	7.68508	2.94206	7.68508	up	9.4248e-14	2.56986e-12
54478	FAM64A	family with sequence similarity 64 member A	9.29569	9.31274	9.30273	6.79018	6.9226	6.87443	-5.43137	-2.44132	5.43137	down	1.33022e-17	2.83467e-15
25925	ZNF521	zinc finger protein 521	5.8987	5.91733	5.88092	7.05963	6.92571	6.9762	2.12608	1.0882	2.12608	up	6.31911e-11	5.55667e-10
59	ACTA2	actin, alpha 2, smooth muscle, aorta	9.20218	9.2204	9.18145	8.03622	8.12095	8.12487	-2.15447	-1.10733	2.15447	down	8.34034e-14	2.31994e-12
1525	CXADR	coxsackie virus and adenovirus receptor	5.23069	5.27265	5.34534	6.93469	6.86503	6.90938	3.07405	1.62014	3.07405	up	8.46484e-13	1.51902e-11
26503	SLC17A5	solute carrier family 17 (acidic sugar transporter), member 5	6.33172	6.28607	6.396	7.42078	7.50279	7.59039	2.24501	1.16672	2.24501	up	1.90314e-11	1.99205e-10
57552	NCEH1	neutral cholesterol ester hydrolase 1	9.94493	9.87448	9.93757	6.8054	6.66822	6.86112	-8.8198	-3.14075	8.8198	down	2.51837e-18	9.97879e-16
3708	ITPR1	inositol 1,4,5-trisphosphate receptor, type 1	7.94657	7.94058	7.90989	9.05529	9.01292	8.95644	2.10799	1.07587	2.10799	up	1.71862e-13	4.18553e-12
79000	AUNIP	aurora kinase A and ninein interacting protein	6.75615	6.74168	6.79055	5.44897	5.52225	5.45842	-2.43893	-1.28625	2.43893	down	1.12309e-11	1.28498e-10
56911	MAP3K7CL	MAP3K7 C-terminal like	7.8858	7.89523	7.86462	5.97898	5.81578	5.97898	-3.88335	-1.9573	3.88335	down	1.65291e-14	6.354e-13
4162	MCAM	melanoma cell adhesion molecule	6.6135	6.83124	6.82876	8.10155	8.30544	8.0002	2.59889	1.3779	2.59889	up	6.52525e-11	5.7136e-10
4782	NFIC	nuclear factor I/C (CCAAT-binding transcription factor)	9.53923	9.53269	9.59163	8.05556	8.12606	8.16604	-2.71063	-1.43863	2.71063	down	3.29353e-15	1.80362e-13
342908	ZNF404	zinc finger protein 404	6.51945	6.64426	6.80764	7.88459	7.84729	7.8153	2.2846	1.19194	2.2846	up	5.54516e-11	4.98111e-10
770	CA11	carbonic anhydrase XI	5.98511	5.97732	5.98661	7.02529	6.91374	7.01349	2.00161	1.00116	2.00161	up	1.35228e-10	1.07727e-09
285643	KIF4B	kinesin family member 4B	9.10924	9.04639	9.29721	5.41048	5.6492	5.49025	-12.4175	-3.6343	12.4175	down	6.82101e-17	9.31888e-15
84900	RNFT2	ring finger protein, transmembrane 2	6.97733	7.01057	7.29296	5.78785	5.81872	5.4074	-2.68012	-1.4223	2.68012	down	3.40038e-09	1.82692e-08
10733	PLK4	polo-like kinase 4	6.75817	6.72092	6.78882	4.09157	3.9088	3.95172	-6.83026	-2.77194	6.83026	down	7.12576e-15	3.28321e-13
407975	MIR17HG	miR-17-92 cluster host gene	5.71353	5.80595	5.91176	4.63024	4.65994	4.79717	-2.16539	-1.11463	2.16539	down	2.96686e-09	1.61946e-08
51399	TRAPPC4	trafficking protein particle complex 4	8.84059	8.80289	8.87149	7.3228	7.35876	7.21547	-2.90656	-1.53931	2.90656	down	1.45127e-14	5.73632e-13
1746	DLX2	distal-less homeobox 2	8.62276	8.52171	8.54822	9.79357	9.67321	9.75362	2.25934	1.1759	2.25934	up	8.86952e-14	2.45084e-12
127428	TCEANC2	transcription elongation factor A (SII) N-terminal and central domain containing 2	5.39768	5.35996	5.41619	4.32868	4.36802	4.32863	-2.06981	-1.0495	2.06981	down	2.15513e-09	1.22379e-08
79968	WDR76	WD repeat domain 76	8.77042	8.80407	8.84431	6.57891	6.34903	6.55116	-4.96996	-2.31323	4.96996	down	1.78132e-15	1.12292e-13
2171	FABP5	fatty acid binding protein 5 (psoriasis-associated)	7.12742	7.06828	6.97244	5.06818	5.34703	5.18312	-3.62154	-1.8566	3.62154	down	1.9831e-12	3.03029e-11
22954	TRIM32	tripartite motif containing 32	5.86302	6.05225	6.03581	5.06045	4.89138	4.74966	-2.11873	-1.0832	2.11873	down	1.4019e-08	6.42379e-08
5819	PVRL2	poliovirus receptor-related 2 (herpesvirus entry mediator B)	8.03243	8.01918	8.13084	9.31372	9.33244	9.28846	2.37961	1.25072	2.37961	up	2.82086e-14	9.77084e-13
23341	DNAJC16	DnaJ heat shock protein family (Hsp40) member C16	4.8847	4.86129	5.26816	6.47755	6.50827	6.4893	2.80304	1.48699	2.80304	up	5.95564e-10	3.92011e-09
646243	CXADRP2	coxsackie virus and adenovirus receptor pseudogene 2	5.23069	5.27265	5.34534	6.93469	6.86503	6.90938	3.07405	1.62014	3.07405	up	8.46484e-13	1.51902e-11
84515	MCM8	minichromosome maintenance 8 homologous recombination repair factor	7.61711	7.72668	7.75269	6.19429	6.62074	6.51011	-2.39017	-1.25711	2.39017	down	1.2557e-09	7.58877e-09
81691	LOC81691	exonuclease NEF-sp	5.83936	5.69467	6.02953	4.75895	4.69356	4.62785	-2.23623	-1.16107	2.23623	down	5.86876e-09	2.96386e-08
4673	NAP1L1	nucleosome assembly protein 1-like 1	10.2897	10.2835	10.0508	8.9676	9.04251	8.92235	-2.34654	-1.23054	2.34654	down	3.90298e-12	5.32855e-11
201266	SLC39A11	solute carrier family 39, member 11	6.98139	6.97151	7.1579	5.6065	5.79772	5.66693	-2.54303	-1.34655	2.54303	down	4.78981e-11	4.38395e-10
8731	RNMT	RNA (guanine-7-) methyltransferase	6.24862	6.27827	6.14656	7.7157	7.76857	7.70556	2.83915	1.50546	2.83915	up	2.29676e-13	5.2947e-12
28234	SLCO1B3	solute carrier organic anion transporter family member 1B3	4.39578	4.4473	4.39907	5.73191	5.71474	5.36196	2.27966	1.18882	2.27966	up	1.30053e-08	5.99575e-08
3489	IGFBP6	insulin like growth factor binding protein 6	10.7682	10.8265	10.8285	11.8686	11.849	11.8301	2.05833	1.04147	2.05833	up	2.64126e-15	1.53428e-13
84858	ZNF503	zinc finger protein 503	9.42292	9.44789	9.42248	10.5285	10.5015	10.523	2.12369	1.08657	2.12369	up	2.26594e-15	1.35645e-13
1836	SLC26A2	solute carrier family 26 (anion exchanger), member 2	8.48187	8.4859	8.65909	7.44279	7.55847	7.53169	-2.04387	-1.0313	2.04387	down	2.32378e-11	2.3581e-10
9518	GDF15	growth differentiation factor 15	8.44939	8.65412	8.52718	11.7283	11.7719	11.8239	9.38977	3.23109	9.38977	up	5.66534e-19	3.99934e-16
9319	TRIP13	thyroid hormone receptor interactor 13	8.75409	8.7988	8.7112	5.11014	4.7206	5.11445	-13.6702	-3.77297	13.6702	down	6.90685e-16	5.36272e-14
79712	GTDC1	glycosyltransferase like domain containing 1	6.36823	6.3733	6.36823	4.91731	5.32857	4.79907	-2.55786	-1.35494	2.55786	down	8.85695e-09	4.2674e-08
64762	GAREM1	GRB2 associated regulator of MAPK1 subtype 1	7.2796	7.22102	7.35115	9.291	9.24238	9.33529	4.01565	2.00563	4.01565	up	2.43841e-16	2.42051e-14
126820	WDR63	WD repeat domain 63	5.08168	5.1942	4.93304	6.29834	6.35044	6.28648	2.36545	1.24211	2.36545	up	3.89482e-10	2.71013e-09
6230	RPS25	ribosomal protein S25	6.53151	6.80782	6.88968	5.32324	5.22512	5.31301	-2.74324	-1.45588	2.74324	down	1.8766e-10	1.43798e-09
84525	HOPX	HOP homeobox	6.3076	6.33327	6.42518	3.87472	4.09847	4.13983	-4.98529	-2.31768	4.98529	down	4.01679e-13	8.33229e-12
55799	CACNA2D3	calcium channel, voltage-dependent, alpha 2/delta subunit 3	5.57688	5.63293	5.94275	4.22051	4.71174	4.38027	-2.42841	-1.28001	2.42841	down	8.26182e-08	3.17937e-07
2332	FMR1	fragile X mental retardation 1	9.29887	9.24194	9.14131	7.8985	7.91066	8.06579	-2.41004	-1.26906	2.41004	down	9.81567e-13	1.71665e-11
100528016	TMX2-CTNND1	TMX2-CTNND1 readthrough (NMD candidate)	8.21322	8.13905	8.05579	7.10985	7.12873	7.14945	-2.00928	-1.00668	2.00928	down	1.01813e-11	1.1797e-10
861	RUNX1	runt-related transcription factor 1	5.55211	5.56316	5.58903	6.77009	6.79741	6.79855	2.33041	1.22058	2.33041	up	1.41852e-11	1.56007e-10
113263	GLCCI1	glucocorticoid induced 1	5.6546	5.54747	5.45256	7.15156	7.21305	6.99817	2.96778	1.56938	2.96778	up	8.5307e-12	1.01607e-10
3983	ABLIM1	actin binding LIM protein 1	5.31316	5.31178	5.56291	3.95872	4.30927	4.12085	-2.4055	-1.26634	2.4055	down	1.1132e-08	5.22238e-08
2745	GLRX	glutaredoxin	10.08	10.2073	10.1632	11.4389	11.4784	11.483	2.49081	1.31661	2.49081	up	1.78943e-15	1.12622e-13
2644	GCHFR	GTP cyclohydrolase I feedback regulator	6.37043	6.21451	6.30293	8.34775	8.29781	8.30356	4.05701	2.02042	4.05701	up	2.27869e-15	1.362e-13
283464	GXYLT1	glucoside xylosyltransferase 1	6.63277	6.72518	6.5853	8.09034	8.10956	8.09094	2.73056	1.4492	2.73056	up	1.05625e-13	2.84058e-12
55075	UACA	uveal autoantigen with coiled-coil domains and ankyrin repeats	7.72195	7.81568	7.81915	6.46122	6.33634	6.46181	-2.5772	-1.3658	2.5772	down	1.00705e-12	1.75412e-11
11010	GLIPR1	GLI pathogenesis-related 1	9.72419	9.72725	9.60765	7.73402	7.76935	7.81315	-3.76902	-1.91419	3.76902	down	2.02892e-16	2.10887e-14
5111	PCNA	proliferating cell nuclear antigen	5.61435	5.78551	5.73491	4.75036	4.83128	4.46992	-2.03882	-1.02774	2.03882	down	6.26588e-08	2.47069e-07
10206	TRIM13	tripartite motif containing 13	5.97407	6.11032	6.06509	7.33573	7.13651	7.20329	2.25848	1.17535	2.25848	up	7.58072e-11	6.50843e-10
80853	KDM7A	lysine (K)-specific demethylase 7A	5.40096	5.33354	5.58401	7.72372	7.77193	7.81664	5.03245	2.33126	5.03245	up	1.62512e-14	6.27792e-13
83895	KRTAP1-5	keratin associated protein 1-5	6.12646	6.24154	6.01854	4.67448	4.79373	4.83841	-2.5668	-1.35997	2.5668	down	2.0551e-10	1.55501e-09
56925	LXN	latexin	6.48516	6.54029	6.36117	5.15856	5.32606	5.47419	-2.20779	-1.1426	2.20779	down	3.35741e-09	1.80631e-08
84057	MND1	meiotic nuclear divisions 1	8.54199	8.67179	8.61225	5.86828	5.96503	5.9716	-6.38066	-2.67371	6.38066	down	6.82033e-17	9.31888e-15
23354	HAUS5	HAUS augmin like complex subunit 5	5.19818	5.22048	5.0892	4.14517	4.06435	4.28414	-2.00657	-1.00473	2.00657	down	2.11925e-08	9.28756e-08
115557	ARHGEF25	Rho guanine nucleotide exchange factor 25	4.83127	4.94736	4.83902	6.2699	6.28347	6.39535	2.72016	1.44369	2.72016	up	2.32597e-11	2.35845e-10
80746	TSEN2	tRNA splicing endonuclease subunit 2	7.58099	7.66739	7.72065	6.68805	6.58414	6.62925	-2.03148	-1.02253	2.03148	down	3.62214e-11	3.43302e-10
4851	NOTCH1	notch 1	5.37148	5.19613	5.30614	6.26701	6.29832	6.42331	2.0538	1.0383	2.0538	up	2.09541e-09	1.19385e-08
55247	NEIL3	nei-like DNA glycosylase 3	8.36247	8.43627	8.42218	6.42695	6.30438	6.37839	-4.1041	-2.03707	4.1041	down	1.10036e-15	7.78668e-14
4521	NUDT1	nudix hydrolase 1	8.85376	8.85091	8.89513	7.55614	7.65602	7.63809	-2.37817	-1.24985	2.37817	down	4.92522e-14	1.52935e-12
9149	DYRK1B	dual specificity tyrosine-(Y)-phosphorylation regulated kinase 1B	6.3792	6.03585	6.11325	7.16787	7.32175	7.34272	2.14555	1.10135	2.14555	up	3.3172e-09	1.78697e-08
5427	POLE2	polymerase (DNA directed), epsilon 2, accessory subunit	8.42288	8.33249	8.4424	5.77641	5.97455	6.02257	-5.5587	-2.47475	5.5587	down	3.05097e-15	1.71388e-13
55973	BCAP29	B-cell receptor-associated protein 29	6.6157	6.7282	6.70384	5.17771	5.23281	5.17771	-2.80209	-1.4865	2.80209	down	3.93909e-12	5.37223e-11
345757	FAM174A	family with sequence similarity 174 member A	6.3681	6.43075	6.26434	5.33485	5.0669	5.08317	-2.28589	-1.19276	2.28589	down	1.72232e-09	1.00569e-08
9156	EXO1	exonuclease 1	7.4967	7.13485	7.27024	4.80183	4.57211	4.44033	-6.47931	-2.69584	6.47931	down	4.92857e-13	9.72079e-12
285533	RNF175	ring finger protein 175	5.80089	5.66624	5.84986	7.38043	7.50029	7.45022	3.18505	1.67132	3.18505	up	5.35325e-13	1.03911e-11
5194	PEX13	peroxisomal biogenesis factor 13	7.05835	7.08047	7.19951	8.2693	8.23555	8.32809	2.24213	1.16487	2.24213	up	1.87297e-12	2.89281e-11
55862	ECHDC1	ethylmalonyl-CoA decarboxylase 1	10.315	10.5033	10.2844	7.43933	7.51127	7.43302	-7.49714	-2.90634	7.49714	down	1.33978e-17	2.83531e-15
10140	TOB1	transducer of ERBB2, 1	6.85039	6.92904	7.03459	8.09732	8.12669	8.04709	2.22277	1.15236	2.22277	up	5.58318e-12	7.13082e-11
406982	MIR20A	microRNA 20a	5.71353	5.80595	5.91176	4.63024	4.65994	4.79717	-2.16539	-1.11463	2.16539	down	2.96686e-09	1.61946e-08
9890	PLPPR4	phospholipid phosphatase related 4	8.62804	8.51086	8.58085	6.25492	6.51688	6.52575	-4.40986	-2.14073	4.40986	down	3.49271e-14	1.1489e-12
100996939	PYURF	PIGY upstream reading frame	9.24177	9.29786	9.14453	8.18225	8.21215	8.24373	-2.02138	-1.01534	2.02138	down	1.33936e-12	2.20102e-11
3915	LAMC1	laminin subunit gamma 1	9.94818	9.94956	9.91216	8.85105	8.85476	8.82834	-2.13157	-1.09192	2.13157	down	6.67277e-15	3.11326e-13
29781	NCAPH2	non-SMC condensin II complex subunit H2	9.02936	9.12237	9.17998	7.88835	7.87009	7.90602	-2.33337	-1.22242	2.33337	down	1.15125e-13	3.03772e-12
79807	GSTCD	glutathione S-transferase, C-terminal domain containing	8.37185	8.39511	8.30166	7.08463	7.20174	7.12184	-2.32969	-1.22014	2.32969	down	5.05676e-13	9.93364e-12
8347	HIST1H2BC	histone cluster 1, H2bc	5.35353	5.4577	5.66755	7.41323	7.36561	7.45265	3.77786	1.91757	3.77786	up	8.68209e-13	1.55162e-11
2002	ELK1	ELK1, member of ETS oncogene family	6.62213	6.64621	6.86082	5.19786	5.14187	5.19011	-2.89408	-1.53311	2.89408	down	1.53511e-11	1.66413e-10
220042	DDIAS	DNA damage-induced apoptosis suppressor	7.47513	7.71169	7.55048	5.70018	5.1399	5.12048	-4.78631	-2.25891	4.78631	down	5.87204e-11	5.2316e-10
55356	SLC22A15	solute carrier family 22, member 15	6.37479	6.32258	6.5925	8.0713	8.07193	8.12934	3.16214	1.6609	3.16214	up	6.38181e-13	1.19957e-11
23234	DNAJC9	DnaJ heat shock protein family (Hsp40) member C9	9.47501	9.40505	9.42811	8.19699	8.21941	8.24137	-2.32431	-1.2168	2.32431	down	9.20482e-15	4.04167e-13
10403	NDC80	NDC80 kinetochore complex component	9.45694	9.48365	9.46912	6.32896	6.2941	6.20707	-9.14633	-3.19319	9.14633	down	4.92094e-19	3.78333e-16
3311	HSPA7	heat shock protein family A (Hsp70) member 7	4.69081	4.92776	4.86009	6.12749	6.23893	6.29088	2.62602	1.39288	2.62602	up	1.66255e-10	1.296e-09
28996	HIPK2	homeodomain interacting protein kinase 2	10.8567	10.7983	10.6689	9.62066	9.67671	9.71903	-2.14726	-1.1025	2.14726	down	6.60002e-13	1.23408e-11
1440	CSF3	colony stimulating factor 3	5.47711	5.58812	5.65425	8.11737	8.16681	8.286	6.13431	2.6169	6.13431	up	1.12644e-15	7.85902e-14
8239	USP9X	ubiquitin specific peptidase 9, X-linked	6.80137	6.77447	6.89744	5.40033	5.39164	5.17443	-2.83293	-1.50229	2.83293	down	2.03046e-11	2.10231e-10
64421	DCLRE1C	DNA cross-link repair 1C	6.21748	6.30271	6.23598	5.00392	5.31378	5.31739	-2.05674	-1.04036	2.05674	down	1.49282e-08	6.79988e-08
153642	ARSK	arylsulfatase family member K	6.37983	6.55425	6.64096	7.62059	7.66381	7.61512	2.15571	1.10816	2.15571	up	1.09525e-10	8.94313e-10
11037	STON1	stonin 1	5.51946	5.36817	5.48711	6.76646	6.68999	6.72663	2.41069	1.26945	2.41069	up	3.45222e-11	3.29667e-10
7443	VRK1	vaccinia related kinase 1	8.48097	8.54333	8.25599	7.41534	7.29939	7.19486	-2.17885	-1.12357	2.17885	down	3.43723e-10	2.43142e-09
1634	DCN	decorin	4.48337	4.1128	4.42432	6.29817	6.43439	6.4326	4.13596	2.04822	4.13596	up	9.00358e-12	1.06399e-10
51339	DACT1	dishevelled-binding antagonist of beta-catenin 1	6.19516	6.27468	6.20558	5.06303	5.1977	5.27646	-2.06491	-1.04608	2.06491	down	2.06106e-09	1.17753e-08
55591	VEZT	vezatin, adherens junctions transmembrane protein	7.31822	7.25725	7.31018	5.79823	5.79536	5.80414	-2.82054	-1.49597	2.82054	down	3.24786e-13	7.00102e-12
3685	ITGAV	integrin alpha V	7.28172	7.11034	7.13651	5.41305	5.61028	5.52444	-3.16075	-1.66027	3.16075	down	2.37215e-12	3.50857e-11
5347	PLK1	polo-like kinase 1	7.79904	7.79791	7.84133	5.39346	5.20958	5.15803	-5.89328	-2.55907	5.89328	down	3.51993e-15	1.88547e-13
145567	TTC7B	tetratricopeptide repeat domain 7B	7.9672	7.87048	7.90278	6.86282	6.86995	6.8	-2.09831	-1.06923	2.09831	down	4.13545e-12	5.59514e-11
1820	ARID3A	AT-rich interaction domain 3A	5.58194	5.50735	5.43514	7.34852	7.3777	7.46926	3.70725	1.89035	3.70725	up	8.89592e-14	2.45467e-12
55142	HAUS2	HAUS augmin like complex subunit 2	8.3939	8.33309	8.20656	7.06052	7.06025	6.92919	-2.45297	-1.29453	2.45297	down	2.56496e-12	3.73319e-11
351	APP	amyloid beta (A4) precursor protein	9.25451	9.26609	9.14069	11.4988	11.4548	11.4093	4.70403	2.2339	4.70403	up	6.05057e-18	1.75559e-15
254428	SLC41A1	solute carrier family 41 (magnesium transporter), member 1	7.61672	7.60501	7.67653	6.14211	6.00519	6.07655	-2.94473	-1.55814	2.94473	down	2.17217e-13	5.08482e-12
56129	PCDHB7	protocadherin beta 7	5.61795	5.56122	5.3854	6.64032	6.65396	6.52995	2.12366	1.08655	2.12366	up	1.2014e-09	7.29437e-09
8976	WASL	Wiskott-Aldrich syndrome-like	8.22367	8.33161	8.31839	6.95733	7.09314	7.10312	-2.36203	-1.24003	2.36203	down	1.50243e-12	2.42032e-11
4808	NHLH2	nescient helix-loop-helix 2	3.61865	3.51084	3.88843	4.91716	5.06265	4.91871	2.45128	1.29353	2.45128	up	7.80151e-09	3.80658e-08
10493	VAT1	vesicle amine transport 1	9.3445	9.3809	9.40398	10.4731	10.4906	10.4909	2.15602	1.10837	2.15602	up	3.01451e-15	1.69582e-13
7544	ZFY	zinc finger protein, Y-linked	4.95387	4.81448	4.96781	6.04374	6.07738	6.10699	2.24075	1.16398	2.24075	up	4.27266e-10	2.93811e-09
4520	MTF1	metal-regulatory transcription factor 1	4.76859	4.62673	4.59245	5.79935	5.80825	5.76166	2.18429	1.12716	2.18429	up	1.17152e-09	7.14282e-09
6715	SRD5A1	steroid-5-alpha-reductase, alpha polypeptide 1 (3-oxo-5 alpha-steroid delta 4-dehydrogenase alpha 1)	6.57391	6.52444	6.6181	5.57344	5.62684	5.50824	-2.00367	-1.00264	2.00367	down	5.75e-10	3.80198e-09
10000	AKT3	v-akt murine thymoma viral oncogene homolog 3	6.09407	6.19945	6.07121	5.01934	4.85431	4.82522	-2.33262	-1.22195	2.33262	down	4.99419e-10	3.36787e-09
7846	TUBA1A	tubulin, alpha 1a	12.9831	13.0722	12.9711	11.7406	11.7888	11.7823	-2.35907	-1.23822	2.35907	down	9.5471e-16	6.91944e-14
677842	SNORA50C	small nucleolar RNA, H/ACA box 50C	4.71695	4.99246	5.0337	3.84976	3.72331	3.44579	-2.36431	-1.24142	2.36431	down	5.34809e-08	2.14241e-07
55319	TMA16	translation machinery associated 16 homolog	5.83543	5.86272	5.61119	4.79292	4.72758	4.25695	-2.26153	-1.1773	2.26153	down	2.38072e-07	8.37577e-07
375444	C5orf34	chromosome 5 open reading frame 34	7.87987	7.79678	7.82908	6.29636	6.35231	6.36339	-2.82429	-1.49789	2.82429	down	8.83748e-14	2.44543e-12
26136	TES	testin LIM domain protein	5.71752	5.60789	5.85899	4.80183	4.6092	4.62543	-2.06954	-1.04931	2.06954	down	1.51217e-08	6.87846e-08
8318	CDC45	cell division cycle 45	8.2632	8.29052	8.34149	5.21873	5.19132	5.15558	-8.63299	-3.10986	8.63299	down	1.27556e-17	2.74805e-15
9648	GCC2	GRIP and coiled-coil domain containing 2	8.16809	8.07299	8.14826	9.20766	9.23258	9.20301	2.12084	1.08464	2.12084	up	9.89581e-14	2.68708e-12
8506	CNTNAP1	contactin associated protein 1	6.23722	6.17647	6.16366	7.13038	7.25156	7.26657	2.03315	1.02372	2.03315	up	1.01916e-10	8.41114e-10
50848	F11R	F11 receptor	7.65105	7.52959	7.62655	6.38145	6.48145	6.24861	-2.34875	-1.23189	2.34875	down	2.97508e-11	2.9076e-10
5305	PIP4K2A	phosphatidylinositol-5-phosphate 4-kinase, type II, alpha	9.23768	9.3178	9.29252	7.18564	7.38125	7.34913	-3.93763	-1.97733	3.93763	down	2.00866e-15	1.23836e-13
2920	CXCL2	chemokine (C-X-C motif) ligand 2	6.4897	6.48484	6.56324	8.06619	8.11846	8.07605	2.97792	1.57431	2.97792	up	2.12831e-14	7.82844e-13
26100	WIPI2	WD repeat domain, phosphoinositide interacting 2	6.93313	6.93998	7.05738	8.09674	8.06714	8.08411	2.15223	1.10583	2.15223	up	2.47722e-12	3.63653e-11
29127	RACGAP1	Rac GTPase activating protein 1	8.4248	8.30601	8.50331	6.23636	6.41265	6.24861	-4.3234	-2.11217	4.3234	down	1.56014e-14	6.05073e-13
90853	SPOCD1	SPOC domain containing 1	9.64232	9.7079	9.72202	8.32976	8.37157	8.40759	-2.49858	-1.32111	2.49858	down	4.94393e-15	2.46944e-13
23639	LRRC6	leucine rich repeat containing 6	5.41623	5.54666	5.67248	6.63023	6.76637	6.81883	2.28684	1.19335	2.28684	up	6.35719e-10	4.15235e-09
23531	MMD	monocyte to macrophage differentiation-associated	7.18289	7.15371	7.11668	4.58512	4.19618	4.68582	-6.32933	-2.66205	6.32933	down	7.17654e-13	1.32233e-11
1072	CFL1	cofilin 1 (non-muscle)	13.1195	13.1101	13.0862	11.9948	11.9918	11.9801	-2.16801	-1.11637	2.16801	down	1.38115e-16	1.58039e-14
2643	GCH1	GTP cyclohydrolase 1	5.55252	5.69017	5.48669	6.62425	6.67964	6.51671	2.0426	1.03041	2.0426	up	1.85024e-09	1.07145e-08
284293	HMSD	histocompatibility (minor) serpin domain containing	6.21477	6.24156	6.4466	4.53993	4.62792	4.37494	-3.45028	-1.78671	3.45028	down	1.92932e-11	2.01569e-10
124222	PAQR4	progestin and adipoQ receptor family member IV	7.87123	7.8553	7.96759	5.99478	6.20684	6.17416	-3.41712	-1.77278	3.41712	down	1.92877e-13	4.61421e-12
490	ATP2B1	ATPase, Ca++ transporting, plasma membrane 1	6.47154	6.38274	6.5577	3.58401	3.66794	3.6381	-7.16339	-2.84064	7.16339	down	7.9588e-15	3.59522e-13
134492	NUDCD2	NudC domain containing 2	9.54439	9.62245	9.54696	7.22274	7.19237	7.16927	-5.19266	-2.37647	5.19266	down	4.54244e-18	1.45991e-15
10038	PARP2	poly(ADP-ribose) polymerase 2	8.37086	8.43617	8.51042	7.20673	7.19183	7.32469	-2.29432	-1.19807	2.29432	down	1.73928e-12	2.72244e-11
4281	MID1	midline 1	7.93979	8.06591	7.97345	6.76246	6.85428	6.82701	-2.26336	-1.17847	2.26336	down	2.16122e-12	3.24172e-11
63971	KIF13A	kinesin family member 13A	6.38132	6.42559	6.31238	7.58273	7.59023	7.6496	2.35287	1.23442	2.35287	up	2.28192e-12	3.39303e-11
6392	SDHD	succinate dehydrogenase complex subunit D, integral membrane protein	9.51167	9.62729	9.5645	6.9582	6.99156	6.78851	-6.29874	-2.65506	6.29874	down	7.73915e-17	1.0183e-14
11004	KIF2C	kinesin family member 2C	9.87685	9.97343	9.91742	7.30084	7.3466	7.3495	-6.02204	-2.59025	6.02204	down	1.03468e-18	5.7957e-16
221150	SKA3	spindle and kinetochore associated complex subunit 3	6.94936	6.82849	6.95598	4.82149	4.72543	4.63233	-4.54683	-2.18486	4.54683	down	1.1176e-13	2.97093e-12
51053	GMNN	geminin, DNA replication inhibitor	10.1055	10.1082	10.122	6.55936	6.68391	6.8092	-10.7612	-3.42777	10.7612	down	2.27802e-18	9.51714e-16
387763	C11orf96	chromosome 11 open reading frame 96	5.39309	5.31326	5.39891	6.45447	6.5423	6.6054	2.24332	1.16564	2.24332	up	1.5336e-10	1.20676e-09
23450	SF3B3	splicing factor 3b subunit 3	6.7778	6.78813	6.92736	5.64393	5.64078	5.74303	-2.22713	-1.15518	2.22713	down	1.15305e-10	9.36244e-10
3575	IL7R	interleukin 7 receptor	4.67989	5.14225	5.15062	4.11199	3.87975	3.78226	-2.09399	-1.06625	2.09399	down	9.56885e-07	3.00012e-06
92017	SNX29	sorting nexin 29	6.23409	6.13033	6.19229	7.60714	7.44324	7.51274	2.52358	1.33547	2.52358	up	3.29395e-12	4.61931e-11
81558	FAM117A	family with sequence similarity 117 member A	5.31524	5.17135	5.29236	6.68692	6.62146	6.62146	2.60924	1.38363	2.60924	up	1.49426e-11	1.62659e-10
283219	KCTD21	potassium channel tetramerization domain containing 21	5.41721	5.48834	5.45633	6.67526	6.51282	6.60506	2.20955	1.14375	2.20955	up	1.60956e-10	1.25944e-09
10040	TOM1L1	target of myb1 like 1 membrane trafficking protein	6.2954	6.2486	6.24545	4.80998	5.13122	5.17089	-2.33883	-1.22579	2.33883	down	3.26274e-09	1.76312e-08
28231	SLCO4A1	solute carrier organic anion transporter family member 4A1	6.86921	6.76435	6.72836	8.07053	8.29246	8.21587	2.64937	1.40565	2.64937	up	2.16759e-12	3.24766e-11
55165	CEP55	centrosomal protein 55kDa	9.69367	9.55521	9.47972	6.63956	6.72224	6.79994	-7.23814	-2.85562	7.23814	down	6.43073e-17	9.02167e-15
7170	TPM3	tropomyosin 3	6.13064	6.11728	6.03125	4.40991	4.996	4.81223	-2.55563	-1.35368	2.55563	down	2.32955e-08	1.01153e-07
5985	RFC5	replication factor C subunit 5	9.22332	9.20819	9.15022	7.82457	7.78593	7.8163	-2.61168	-1.38498	2.61168	down	3.46685e-15	1.86224e-13
8337	HIST2H2AA3	histone cluster 2, H2aa3	10.7241	10.7001	10.8071	12.0063	11.9553	11.987	2.36056	1.23913	2.36056	up	1.56016e-15	1.01449e-13
137835	TMEM71	transmembrane protein 71	6.6605	6.61761	6.59843	4.57983	4.1063	4.41389	-4.78607	-2.25884	4.78607	down	5.04397e-12	6.55098e-11
4683	NBN	nibrin	7.79726	7.71492	7.69848	6.40542	6.27285	6.41961	-2.58637	-1.37093	2.58637	down	1.37465e-12	2.24397e-11
79075	DSCC1	DNA replication and sister chromatid cohesion 1	6.76037	6.67954	6.7277	4.18079	4.50741	4.5641	-4.94203	-2.3051	4.94203	down	1.35432e-12	2.22095e-11
4001	LMNB1	lamin B1	5.78231	5.69083	5.73112	3.82827	4.06503	4.15651	-3.29014	-1.71815	3.29014	down	5.18478e-11	4.70264e-10
81831	NETO2	neuropilin and tolloid like 2	9.7847	9.73505	9.65776	8.24874	8.14916	8.18753	-2.88925	-1.53069	2.88925	down	3.46706e-15	1.86224e-13
6659	SOX4	SRY-box 4	7.37055	7.32733	7.45184	8.62331	8.64156	8.6244	2.37268	1.24652	2.37268	up	1.11993e-13	2.97511e-12
10451	VAV3	vav guanine nucleotide exchange factor 3	4.3789	4.13983	4.70723	5.83442	6.09879	6.28915	3.17216	1.66547	3.17216	up	9.30602e-09	4.45584e-08
22900	CARD8	caspase recruitment domain family member 8	5.50293	5.29587	5.64009	4.09165	4.26243	4.42634	-2.32864	-1.21949	2.32864	down	2.33594e-08	1.01363e-07
4176	MCM7	minichromosome maintenance complex component 7	9.70974	9.72983	9.70434	7.27291	7.31965	7.2977	-5.34386	-2.41788	5.34386	down	1.00849e-18	5.73087e-16
348654	GEN1	GEN1, Holliday junction 5' flap endonuclease	7.49481	7.32877	7.14048	5.99419	6.16396	6.41327	-2.18992	-1.13088	2.18992	down	2.93578e-08	1.24864e-07
246175	CNOT6L	CCR4-NOT transcription complex subunit 6-like	6.17334	6.14307	6.24545	3.77801	3.62947	3.62304	-5.69796	-2.51045	5.69796	down	5.48152e-14	1.66226e-12
8794	TNFRSF10C	tumor necrosis factor receptor superfamily member 10c, decoy without an intracellular domain	3.41184	3.05125	3.79791	5.40577	5.65001	5.66173	4.44496	2.15217	4.44496	up	1.15469e-09	7.04785e-09
23710	GABARAPL1	GABA(A) receptor-associated protein like 1	7.11497	7.05567	7.25273	8.17965	8.23572	8.25846	2.11915	1.08349	2.11915	up	1.33647e-11	1.48325e-10
9595	CYTIP	cytohesin 1 interacting protein	5.41617	5.5703	5.61541	7.474	7.47962	7.4582	3.82815	1.93665	3.82815	up	7.47678e-14	2.12284e-12
64282	PAPD5	PAP associated domain containing 5	3.74137	4.00437	3.52776	5.01855	5.11019	5.08135	2.48319	1.3122	2.48319	up	1.34612e-08	6.18774e-08
258010	SVIP	small VCP/p97-interacting protein	7.90026	7.91526	7.7646	6.62784	6.52193	6.51803	-2.46931	-1.30411	2.46931	down	2.45803e-12	3.61649e-11
64839	FBXL17	F-box and leucine-rich repeat protein 17	4.71131	4.43047	4.63148	5.73844	5.76179	5.81971	2.26927	1.18223	2.26927	up	2.38654e-09	1.33795e-08
4720	NDUFS2	NADH:ubiquinone oxidoreductase core subunit S2	4.91283	4.74079	5.05224	6.0168	5.96565	6.05607	2.15978	1.11089	2.15978	up	4.97508e-09	2.56264e-08
4085	MAD2L1	MAD2 mitotic arrest deficient-like 1 (yeast)	10.3343	10.2563	10.0057	8.19772	8.14569	8.05186	-4.19021	-2.06702	4.19021	down	4.75572e-14	1.48229e-12
23678	SGK3	serum/glucocorticoid regulated kinase family member 3	6.11807	6.20943	6.02469	4.66752	4.74778	4.85478	-2.5681	-1.3607	2.5681	down	1.66935e-10	1.30001e-09
56255	TMX4	thioredoxin-related transmembrane protein 4	8.83774	8.73374	8.65345	7.65279	7.6514	7.68363	-2.11262	-1.07904	2.11262	down	2.54482e-12	3.71352e-11
554282	FAM72C	family with sequence similarity 72 member C	7.22947	7.35694	7.43963	5.1171	5.18689	5.12881	-4.58762	-2.19775	4.58762	down	3.28709e-14	1.10254e-12
139886	SPIN4	spindlin family member 4	8.31082	8.25325	8.23567	6.12496	6.65784	6.50864	-3.57044	-1.8361	3.57044	down	4.14842e-11	3.87193e-10
901	CCNG2	cyclin G2	7.02277	6.97253	6.95655	8.57595	8.60706	8.53751	3.00957	1.58956	3.00957	up	4.12522e-15	2.12549e-13
10904	BLCAP	bladder cancer associated protein	9.71649	9.75292	9.80158	10.8298	10.8463	10.8696	2.13108	1.09158	2.13108	up	6.0373e-15	2.88684e-13
2766	GMPR	guanosine monophosphate reductase	5.96277	5.78667	6.00394	4.37101	4.72782	4.5781	-2.56475	-1.35882	2.56475	down	2.06801e-09	1.1803e-08
57415	C3orf14	chromosome 3 open reading frame 14	9.24024	9.3224	9.24226	7.97723	8.01237	8.00604	-2.4112	-1.26975	2.4112	down	1.16047e-14	4.84827e-13
6539	SLC6A12	solute carrier family 6 (neurotransmitter transporter), member 12	4.31366	4.26938	4.64272	5.40934	5.3952	5.45327	2.01487	1.01068	2.01487	up	9.21926e-08	3.51334e-07
3913	LAMB2	laminin subunit beta 2	6.43163	6.33455	6.42308	7.44186	7.46926	7.39263	2.05361	1.03816	2.05361	up	2.66158e-11	2.64605e-10
672	BRCA1	breast cancer 1	7.34017	7.31758	7.39965	5.36353	5.39927	5.41732	-3.88818	-1.95909	3.88818	down	2.06517e-14	7.62479e-13
55714	TENM3	teneurin transmembrane protein 3	7.55451	7.45282	7.66186	6.0083	5.89428	5.98266	-3.02021	-1.59465	3.02021	down	9.46051e-13	1.66433e-11
51514	DTL	denticleless E3 ubiquitin protein ligase homolog (Drosophila)	8.48851	8.58698	8.5252	5.80485	5.64463	5.9334	-6.67732	-2.73927	6.67732	down	1.22456e-15	8.35045e-14
9960	USP3	ubiquitin specific peptidase 3	6.92743	6.99493	7.02715	5.85255	5.84129	5.94414	-2.14926	-1.10384	2.14926	down	6.32565e-11	5.56086e-10
285834	HCG22	HLA complex group 22	8.30014	8.35947	8.33916	5.16494	5.27466	5.13975	-8.81406	-3.13981	8.81406	down	2.25236e-17	4.18555e-15
57586	SYT13	synaptotagmin 13	7.51809	7.43046	7.58526	5.70678	5.87587	5.82756	-3.26677	-1.70787	3.26677	down	4.15722e-13	8.54323e-12
56647	BCCIP	BRCA2 and CDKN1A interacting protein	7.98706	8.03626	8.00176	6.76059	6.68757	6.70019	-2.44909	-1.29224	2.44909	down	2.08575e-13	4.90594e-12
113130	CDCA5	cell division cycle associated 5	9.08926	9.19917	9.1491	6.58673	6.72227	6.57513	-5.72708	-2.5178	5.72708	down	6.72581e-17	9.26313e-15
54764	ZRANB1	zinc finger, RAN-binding domain containing 1	7.26874	7.31834	7.13742	8.40447	8.31478	8.40298	2.1925	1.13258	2.1925	up	5.2673e-12	6.80273e-11
8061	FOSL1	FOS-like antigen 1	8.24477	8.23562	8.26618	6.38295	6.46973	6.47118	-3.50052	-1.80757	3.50052	down	2.98669e-15	1.68604e-13
1033	CDKN3	cyclin-dependent kinase inhibitor 3	9.12021	9.24302	8.92069	6.31803	6.47367	6.26053	-6.69877	-2.7439	6.69877	down	4.56784e-15	2.30508e-13
5868	RAB5A	RAB5A, member RAS oncogene family	8.68158	8.70232	8.58395	9.68325	9.67413	9.66154	2.02374	1.01702	2.02374	up	2.0037e-13	4.74999e-12
4603	MYBL1	v-myb avian myeloblastosis viral oncogene homolog-like 1	8.54057	8.61924	8.58991	7.05834	7.04353	6.91791	-2.98276	-1.57665	2.98276	down	2.36756e-14	8.48556e-13
6546	SLC8A1	solute carrier family 8 (sodium/calcium exchanger), member 1	5.20591	4.95911	4.79304	3.7686	3.6225	3.59614	-2.50291	-1.32361	2.50291	down	8.62404e-09	4.16491e-08
26585	GREM1	gremlin 1, DAN family BMP antagonist	11.29	11.303	11.3362	10.1547	10.0831	10.1069	-2.28918	-1.19483	2.28918	down	9.34037e-16	6.82776e-14
3073	HEXA	hexosaminidase A (alpha polypeptide)	8.02903	7.9141	7.8362	8.95304	8.88105	9.01135	2.03078	1.02204	2.03078	up	1.43093e-11	1.5681e-10
23468	CBX5	chromobox 5	8.4006	8.3533	8.37208	6.20433	6.22951	6.22041	-4.46062	-2.15724	4.46062	down	1.69083e-16	1.84673e-14
2305	FOXM1	forkhead box M1	8.79937	8.91546	8.90322	6.97869	6.95512	6.97421	-3.74079	-1.90334	3.74079	down	4.90097e-16	4.11493e-14
51171	HSD17B14	hydroxysteroid (17-beta) dehydrogenase 14	6.92421	6.91532	6.87714	7.94586	7.87811	7.98024	2.04086	1.02918	2.04086	up	5.13377e-12	6.64779e-11
5634	PRPS2	phosphoribosyl pyrophosphate synthetase 2	9.56358	9.48731	9.5282	6.59051	6.56614	6.35423	-8.12708	-3.02274	8.12708	down	3.63989e-17	5.82531e-15
1488	CTBP2	C-terminal binding protein 2	6.89115	6.9448	6.89115	5.33751	5.56765	5.64743	-2.62352	-1.3915	2.62352	down	8.47709e-11	7.16351e-10
6326	SCN2A	sodium channel, voltage gated, type II alpha subunit	4.50539	4.62556	5.05275	5.77836	5.91399	5.84267	2.16912	1.11711	2.16912	up	2.07919e-07	7.39457e-07
60386	SLC25A19	solute carrier family 25 (mitochondrial thiamine pyrophosphate carrier), member 19	6.593	6.64709	6.68702	5.67731	5.50894	5.55029	-2.09003	-1.06352	2.09003	down	4.45662e-10	3.05336e-09
23590	PDSS1	prenyl (decaprenyl) diphosphate synthase, subunit 1	7.65222	7.66184	7.60322	6.13862	6.17992	6.22951	-2.74425	-1.45641	2.74425	down	2.23347e-13	5.17272e-12
387	RHOA	ras homolog family member A	10.7329	10.8181	10.7002	7.55071	7.43493	7.40968	-9.74929	-3.2853	9.74929	down	2.81781e-19	2.83298e-16
26470	SEZ6L2	seizure related 6 homolog (mouse)-like 2	5.90776	6.01708	6.01708	7.39288	7.28983	7.31109	2.55023	1.35063	2.55023	up	2.95328e-12	4.19407e-11
55071	C9orf40	chromosome 9 open reading frame 40	7.92392	7.86753	7.76375	5.807	5.75201	5.85607	-4.13162	-2.04671	4.13162	down	1.14377e-14	4.79139e-13
55196	KIAA1551	KIAA1551	6.2301	6.21608	6.17221	7.62233	7.64532	7.66518	2.70973	1.43815	2.70973	up	1.65347e-13	4.05965e-12
83394	PITPNM3	PITPNM family member 3	5.93939	6.03191	5.89823	4.97343	4.72676	5.07143	-2.04576	-1.03264	2.04576	down	2.74184e-08	1.17264e-07
2491	CENPI	centromere protein I	6.60624	6.77745	6.94489	4.36237	4.70263	4.94974	-4.30082	-2.10461	4.30082	down	1.81341e-10	1.39666e-09
51377	UCHL5	ubiquitin C-terminal hydrolase L5	6.27058	6.08028	6.00921	4.74966	4.6399	4.82651	-2.60509	-1.38133	2.60509	down	3.38746e-10	2.40098e-09
2151	F2RL2	coagulation factor II (thrombin) receptor-like 2	7.22069	7.15108	6.33233	4.56848	4.21986	4.66755	-5.33715	-2.41607	5.33715	down	4.26662e-09	2.23655e-08
114827	FHAD1	forkhead-associated (FHA) phosphopeptide binding domain 1	5.66702	5.60911	5.8353	4.7129	4.76501	4.62168	-2.00548	-1.00395	2.00548	down	1.33212e-08	6.12783e-08
3837	KPNB1	karyopherin (importin) beta 1	10.7769	10.8135	10.842	9.47817	9.51909	9.60184	-2.42462	-1.27776	2.42462	down	5.00614e-15	2.49238e-13
112479	ERI2	ERI1 exoribonuclease family member 2	7.54948	7.46926	7.16437	5.72469	5.54924	5.51169	-3.48018	-1.79916	3.48018	down	2.28669e-11	2.32584e-10
406979	MIR19A	microRNA 19a	5.71353	5.80595	5.91176	4.63024	4.65994	4.79717	-2.16539	-1.11463	2.16539	down	2.96686e-09	1.61946e-08
116238	TLCD1	TLC domain containing 1	6.39453	6.19301	6.38396	7.41725	7.36955	7.46926	2.13591	1.09485	2.13591	up	1.19478e-10	9.65324e-10
53831	GPR84	G protein-coupled receptor 84	3.75257	2.8947	3.38472	5.58558	5.701	5.92413	5.25214	2.39291	5.25214	up	1.19884e-09	7.27991e-09
22890	ZBTB1	zinc finger and BTB domain containing 1	5.6653	5.59206	5.28039	6.88061	6.70881	6.72614	2.39375	1.25927	2.39375	up	2.73628e-09	1.50582e-08
388	RHOB	ras homolog family member B	9.45334	9.43895	9.43366	8.36575	8.42781	8.40051	-2.06188	-1.04396	2.06188	down	3.96872e-14	1.28288e-12
132320	SCLT1	sodium channel and clathrin linker 1	5.23663	5.23834	5.34659	3.59764	4.02807	3.72427	-2.80992	-1.49053	2.80992	down	1.79654e-09	1.04359e-08
960	CD44	CD44 molecule (Indian blood group)	10.9808	10.9515	10.9594	9.87062	9.85727	9.83263	-2.15904	-1.11039	2.15904	down	1.11401e-15	7.81675e-14
9536	PTGES	prostaglandin E synthase	8.67609	8.62758	8.69941	9.64533	9.676	9.74228	2.02817	1.02018	2.02817	up	1.60463e-13	3.95707e-12
79172	CENPO	centromere protein O	6.91674	6.88431	7.06314	5.91087	5.94158	5.99473	-2.00788	-1.00567	2.00788	down	4.63513e-10	3.1587e-09
128239	IQGAP3	IQ motif containing GTPase activating protein 3	6.54163	6.38072	6.49116	4.94492	4.37536	4.60052	-3.5576	-1.8309	3.5576	down	3.87067e-10	2.69476e-09
3310	HSPA6	heat shock protein family A (Hsp70) member 6	4.69081	4.92776	4.86009	6.12749	6.23893	6.29088	2.62602	1.39288	2.62602	up	1.66255e-10	1.296e-09
79733	E2F8	E2F transcription factor 8	6.84385	6.88103	6.79055	3.9621	3.56587	3.93988	-8.08843	-3.01586	8.08843	down	8.1432e-14	2.2758e-12
10018	BCL2L11	BCL2-like 11 (apoptosis facilitator)	5.80857	5.39668	5.31312	6.83534	6.95754	6.5912	2.44286	1.28857	2.44286	up	4.23981e-08	1.73876e-07
56900	TMEM167B	transmembrane protein 167B	4.99439	5.06061	5.10316	6.95407	6.62193	6.52413	3.13252	1.64732	3.13252	up	1.49442e-10	1.17734e-09
6009	RHEB	Ras homolog enriched in brain	9.04783	8.98607	9.0317	8.04191	7.98902	7.9345	-2.04683	-1.03339	2.04683	down	4.40993e-13	8.92021e-12
23177	CEP68	centrosomal protein 68kDa	7.05073	6.91895	6.98976	5.18803	5.00929	5.37753	-3.46983	-1.79486	3.46983	down	1.10129e-11	1.2641e-10
387921	NHLRC3	NHL repeat containing 3	6.55334	6.4473	6.63362	5.19684	5.58714	5.53128	-2.15298	-1.10633	2.15298	down	1.99381e-08	8.79683e-08
2627	GATA6	GATA binding protein 6	7.69846	7.71023	7.57969	6.1142	6.03477	5.94278	-3.09987	-1.63221	3.09987	down	4.09705e-13	8.45502e-12
144402	CPNE8	copine VIII	5.95359	6.2134	6.16246	4.93695	4.91716	4.87726	-2.29638	-1.19936	2.29638	down	9.66442e-10	6.01018e-09
5327	PLAT	plasminogen activator, tissue	7.45922	7.37664	7.49115	9.01209	9.0031	9.06394	2.99808	1.58404	2.99808	up	3.26822e-15	1.79602e-13
406980	MIR19B1	microRNA 19b-1	5.71353	5.80595	5.91176	4.63024	4.65994	4.79717	-2.16539	-1.11463	2.16539	down	2.96686e-09	1.61946e-08
7168	TPM1	tropomyosin 1 (alpha)	6.57636	6.60925	6.6918	5.6138	5.42204	5.48565	-2.17142	-1.11864	2.17142	down	3.90139e-10	2.71422e-09
84275	SLC25A33	solute carrier family 25 (pyrimidine nucleotide carrier), member 33	7.85996	7.89179	8.01618	6.84938	6.73599	6.96474	-2.10323	-1.07261	2.10323	down	1.23983e-10	9.97412e-10
79723	SUV39H2	suppressor of variegation 3-9 homolog 2	8.35576	8.34685	8.30348	6.82258	6.80475	6.81333	-2.87151	-1.52181	2.87151	down	7.70647e-15	3.50546e-13
27346	TMEM97	transmembrane protein 97	8.74656	8.75804	8.66899	7.44281	7.37443	7.42546	-2.47993	-1.3103	2.47993	down	4.12741e-14	1.32003e-12
56892	C8orf4	chromosome 8 open reading frame 4	3.51339	3.51493	3.63055	5.08612	5.06788	5.08025	2.87812	1.52513	2.87812	up	4.81302e-11	4.40211e-10
55839	CENPN	centromere protein N	7.42226	7.36372	7.42578	5.56827	5.54023	5.4947	-3.65411	-1.86952	3.65411	down	2.89012e-14	9.94054e-13
10855	HPSE	heparanase	6.43967	6.41872	6.53197	4.83059	4.65617	4.43444	-3.53829	-1.82305	3.53829	down	2.76113e-11	2.72893e-10
4312	MMP1	matrix metallopeptidase 1	4.46058	4.50597	4.50144	7.0309	6.92503	6.98523	5.6219	2.49106	5.6219	up	5.80044e-15	2.80438e-13
4174	MCM5	minichromosome maintenance complex component 5	8.55423	8.8777	8.69008	6.33278	6.55246	6.35701	-4.9016	-2.29325	4.9016	down	7.75451e-14	2.18587e-12
3553	IL1B	interleukin 1 beta	6.85428	6.85012	7.01278	11.7414	11.7115	11.7534	28.4372	4.82971	28.4372	up	1.10659e-21	3.60996e-17
5315	PKM	pyruvate kinase, muscle	6.94193	6.8667	7.11307	8.0839	8.14575	8.1559	2.22625	1.15462	2.22625	up	2.34362e-11	2.37144e-10
2246	FGF1	fibroblast growth factor 1 (acidic)	6.97564	7.00228	6.9725	5.66873	5.79077	5.78061	-2.3567	-1.23677	2.3567	down	1.46171e-11	1.59692e-10
84986	ARHGAP19	Rho GTPase activating protein 19	7.0802	7.2247	7.23548	4.93977	4.96384	5.27521	-4.34851	-2.12052	4.34851	down	1.6743e-12	2.64077e-11
2581	GALC	galactosylceramidase	4.30158	4.07033	4.47154	5.45019	5.5117	5.4047	2.25696	1.17438	2.25696	up	1.6066e-08	7.26455e-08
8566	PDXK	pyridoxal (pyridoxine, vitamin B6) kinase	5.4715	4.88701	5.64009	6.61349	6.39179	6.5029	2.2499	1.16986	2.2499	up	1.34829e-06	4.10741e-06
25917	THUMPD3	THUMP domain containing 3	6.15316	6.06134	6.10187	4.76557	5.01313	4.86978	-2.33372	-1.22263	2.33372	down	6.18881e-10	4.05258e-09
81928	CABLES2	Cdk5 and Abl enzyme substrate 2	7.60263	7.60666	7.71249	6.65003	6.48767	6.62258	-2.07604	-1.05383	2.07604	down	5.75783e-11	5.1427e-10
55014	STX17	syntaxin 17	6.46799	6.48919	6.57031	4.66782	5.2044	5.29313	-2.73975	-1.45405	2.73975	down	2.05258e-08	9.03071e-08
25886	POC1A	POC1 centriolar protein A	7.61716	7.55254	7.52955	6.26405	6.19994	6.10797	-2.59505	-1.37576	2.59505	down	1.62327e-12	2.57269e-11
51182	HSPA14	heat shock protein family A (Hsp70) member 14	7.46388	7.41252	7.48871	6.38263	6.49243	6.48061	-2.00437	-1.00315	2.00437	down	4.42241e-11	4.09452e-10
91057	CCDC34	coiled-coil domain containing 34	9.42791	9.39058	9.42774	8.432	8.3419	8.43224	-2.01861	-1.01336	2.01861	down	1.95037e-13	4.6517e-12
58986	TMEM8A	transmembrane protein 8A	6.4525	6.54894	6.66819	7.65241	7.54113	7.53134	2.02569	1.01842	2.02569	up	2.34869e-10	1.74648e-09
2184	FAH	fumarylacetoacetate hydrolase (fumarylacetoacetase)	5.471	5.52563	5.52563	6.45591	6.51398	6.5577	2.00246	1.00178	2.00246	up	4.97067e-10	3.35456e-09
148789	B3GALNT2	beta-1,3-N-acetylgalactosaminyltransferase 2	7.8597	7.82513	7.99891	6.57359	6.62879	6.50201	-2.50785	-1.32645	2.50785	down	2.65342e-12	3.83489e-11
60485	SAV1	salvador family WW domain containing protein 1	5.22135	5.11158	5.45101	6.39018	6.48575	6.34689	2.21344	1.14629	2.21344	up	4.03773e-09	2.12709e-08
203068	TUBB	tubulin, beta class I	12.0396	12.0584	11.9231	10.8576	10.8557	10.8665	-2.21465	-1.14708	2.21465	down	1.202e-14	4.98735e-13
55676	SLC30A6	solute carrier family 30 (zinc transporter), member 6	8.92937	8.98812	8.92569	6.94489	6.90532	6.89379	-4.09272	-2.03306	4.09272	down	8.24704e-17	1.06371e-14
891	CCNB1	cyclin B1	10.9845	10.9974	10.9912	8.62975	8.64238	8.64515	-5.10519	-2.35196	5.10519	down	6.63336e-20	1.52997e-16
3251	HPRT1	hypoxanthine phosphoribosyltransferase 1	10.1352	10.0722	10.0855	8.96212	8.91499	8.95965	-2.2223	-1.15206	2.2223	down	5.86601e-15	2.82563e-13
100129792	CCDC152	coiled-coil domain containing 152	5.62284	5.52526	5.49528	3.95364	3.88515	3.89085	-3.11215	-1.63791	3.11215	down	1.31914e-11	1.46733e-10
7322	UBE2D2	ubiquitin conjugating enzyme E2D 2	5.16494	5.10397	5.07849	3.40798	3.63174	3.20338	-3.25224	-1.70143	3.25224	down	2.92756e-10	2.11166e-09
254887	ZDHHC23	zinc finger, DHHC-type containing 23	6.73894	6.84259	7.01349	4.50816	4.44969	4.69015	-4.97837	-2.31567	4.97837	down	5.02205e-13	9.87441e-12
100506403	LOC100506403	uncharacterized LOC100506403	5.55211	5.56316	5.58903	6.77009	6.79741	6.79855	2.33041	1.22058	2.33041	up	1.41852e-11	1.56007e-10
56648	EIF5A2	eukaryotic translation initiation factor 5A2	6.27017	6.24429	6.1511	4.29095	4.63278	4.48045	-3.37244	-1.75379	3.37244	down	2.81437e-11	2.77402e-10
56931	DUS3L	dihydrouridine synthase 3-like	7.12614	7.4063	7.49547	6.00816	5.92784	5.86415	-2.656	-1.40925	2.656	down	1.7001e-10	1.31976e-09
2300	FOXL1	forkhead box L1	9.44497	9.45634	9.52647	8.28391	8.3514	8.43486	-2.17227	-1.1192	2.17227	down	3.67239e-13	7.74163e-12
92126	DSEL	dermatan sulfate epimerase-like	8.77917	8.79331	8.67743	6.6466	6.8376	6.82236	-3.94799	-1.98112	3.94799	down	8.13129e-15	3.66048e-13
7874	USP7	ubiquitin specific peptidase 7 (herpes virus-associated)	9.30234	9.29784	9.29614	8.09376	8.03918	8.13076	-2.31478	-1.21087	2.31478	down	1.57285e-14	6.09402e-13
57449	PLEKHG5	pleckstrin homology and RhoGEF domain containing G5	5.43861	5.58787	5.576	6.58091	6.68701	6.74252	2.19769	1.13599	2.19769	up	3.1717e-10	2.26649e-09
9374	PPT2	palmitoyl-protein thioesterase 2	6.90778	6.92813	7.01766	7.97688	8.03836	8.09232	2.12088	1.08466	2.12088	up	5.54912e-12	7.09195e-11
116211	TM4SF19	transmembrane 4 L six family member 19	7.27054	7.24864	7.30138	8.82989	8.86856	8.87369	2.99771	1.58386	2.99771	up	1.24114e-15	8.40501e-14
80209	PROSER1	proline and serine rich 1	7.48633	7.55008	7.45552	5.73866	5.76234	5.75257	-3.35455	-1.74612	3.35455	down	4.29642e-14	1.36296e-12
93655	ST7-OT3	ST7 overlapping transcript 3	7.16074	7.06648	7.13075	6.07759	6.00456	6.03072	-2.11653	-1.0817	2.11653	down	3.65149e-11	3.45749e-10
9212	AURKB	aurora kinase B	9.32634	9.25563	9.36895	6.71189	6.78096	6.72544	-5.96922	-2.57754	5.96922	down	7.35984e-18	1.96312e-15
705	BYSL	bystin like	8.4964	8.48856	8.61474	7.402	7.40364	7.54129	-2.12028	-1.08426	2.12028	down	6.84517e-12	8.45351e-11
84970	C1orf94	chromosome 1 open reading frame 94	8.82622	8.82769	8.81534	7.35075	7.29151	7.3639	-2.80441	-1.4877	2.80441	down	3.11261e-15	1.73545e-13
23169	SLC35D1	solute carrier family 35 (UDP-GlcA/UDP-GalNAc transporter), member D1	7.56379	7.46114	7.46304	5.60171	5.76703	5.77118	-3.44066	-1.78268	3.44066	down	2.3329e-13	5.36637e-12
6428	SRSF3	serine/arginine-rich splicing factor 3	6.45181	6.45467	6.41716	5.33255	5.21931	5.2056	-2.27951	-1.18873	2.27951	down	1.04619e-10	8.59262e-10
6648	SOD2	superoxide dismutase 2, mitochondrial	5.6807	5.49121	5.61964	6.85127	6.77879	6.78394	2.30934	1.20748	2.30934	up	8.04684e-11	6.86502e-10
51388	NIP7	NIP7, nucleolar pre-rRNA processing protein	7.73433	7.71294	7.5977	6.2288	6.24374	6.36695	-2.64236	-1.40183	2.64236	down	1.73524e-12	2.72096e-11
64326	RFWD2	ring finger and WD repeat domain 2, E3 ubiquitin protein ligase	8.67903	8.61451	8.45743	7.08401	6.96333	7.0226	-2.94924	-1.56034	2.94924	down	2.46977e-13	5.62042e-12
7267	TTC3	tetratricopeptide repeat domain 3	8.01236	8.00038	8.04672	9.10838	9.16171	9.11147	2.15452	1.10737	2.15452	up	4.75296e-14	1.48229e-12
2820	GPD2	glycerol-3-phosphate dehydrogenase 2	8.7466	8.67071	8.66733	6.8085	6.72455	6.67571	-3.88692	-1.95863	3.88692	down	1.14173e-15	7.93743e-14
7378	UPP1	uridine phosphorylase 1	9.08801	9.15763	9.09665	7.9141	8.01075	8.06908	-2.16763	-1.11612	2.16763	down	6.05404e-13	1.14787e-11
51077	FCF1	FCF1 rRNA-processing protein	7.51705	7.82254	7.45618	5.73547	5.86932	6.06675	-3.26725	-1.70808	3.26725	down	8.37695e-11	7.09284e-10
8658	TNKS	tankyrase, TRF1-interacting ankyrin-related ADP-ribose polymerase	6.95978	6.96379	7.01984	8.43108	8.47742	8.44254	2.7687	1.46921	2.7687	up	1.09589e-14	4.63536e-13
4071	TM4SF1	transmembrane 4 L six family member 1	10.1529	10.1778	10.1158	8.97722	8.91592	8.94309	-2.3028	-1.20339	2.3028	down	3.38447e-15	1.83537e-13
51203	NUSAP1	nucleolar and spindle associated protein 1	9.44957	9.57247	9.20099	6.99063	7.093	7.12439	-5.05719	-2.33834	5.05719	down	3.33309e-14	1.11321e-12
6876	TAGLN	transgelin	8.45095	8.57505	8.54124	7.3049	7.22736	7.38947	-2.32168	-1.21517	2.32168	down	1.43941e-12	2.33221e-11
284217	LAMA1	laminin subunit alpha 1	6.35645	6.33963	6.36917	7.29127	7.39338	7.41308	2.01507	1.01083	2.01507	up	4.53556e-11	4.18347e-10
55872	PBK	PDZ binding kinase	9.78217	9.94444	9.89648	7.07314	7.09996	7.19172	-6.74004	-2.75276	6.74004	down	1.03764e-17	2.49607e-15
366	AQP9	aquaporin 9	8.8388	8.84512	8.78467	9.84831	9.83908	9.85049	2.03228	1.0231	2.03228	up	2.48857e-14	8.84649e-13
7320	UBE2B	ubiquitin conjugating enzyme E2B	8.26554	8.20081	8.17333	7.06354	7.01407	6.95266	-2.3024	-1.20314	2.3024	down	7.01284e-13	1.30011e-11
22824	HSPA4L	heat shock protein family A (Hsp70) member 4 like	7.13073	7.06057	7.07941	8.37769	8.3051	8.25124	2.33125	1.22111	2.33125	up	4.63915e-13	9.28067e-12
10608	MXD4	MAX dimerization protein 4	6.14085	6.36029	6.38132	7.48428	7.54885	7.77409	2.47642	1.30825	2.47642	up	2.57715e-10	1.89268e-09
126382	NR2C2AP	nuclear receptor 2C2-associated protein	7.79267	7.75621	7.78769	6.24053	6.25376	6.48213	-2.7385	-1.45338	2.7385	down	3.51691e-12	4.88653e-11
253714	MMS22L	MMS22 like, DNA repair protein	7.11766	6.99052	7.10719	4.85956	5.25963	4.95371	-4.13386	-2.04749	4.13386	down	4.82575e-12	6.32773e-11
55771	PRR11	proline rich 11	7.54977	7.57644	7.70245	4.46415	4.51346	4.53336	-8.6093	-3.1059	8.6093	down	2.53414e-16	2.48409e-14
8644	AKR1C3	aldo-keto reductase family 1, member C3	10.1014	10.1811	10.1771	11.266	11.2766	11.3197	2.19501	1.13423	2.19501	up	3.83692e-15	2.00691e-13
727	C5	complement component 5	4.97277	5.10628	5.2918	4.06726	3.85799	3.93822	-2.24876	-1.16913	2.24876	down	1.45822e-08	6.65931e-08
11223	MST1L	macrophage stimulating 1-like	5.27993	5.49952	5.30424	6.41531	6.64191	6.68301	2.32761	1.21885	2.32761	up	1.54598e-09	9.12508e-09
83903	GSG2	germ cell associated 2 (haspin)	5.86266	5.5342	5.74076	4.35855	4.52877	4.52877	-2.36282	-1.24051	2.36282	down	4.37441e-09	2.28481e-08
10434	LYPLA1	lysophospholipase I	8.27155	8.48022	8.26455	6.28977	6.22919	6.42722	-4.06535	-2.02338	4.06535	down	7.27959e-14	2.07437e-12
91893	FDXACB1	ferredoxin-fold anticodon binding domain containing 1	5.1445	5.07924	5.26004	4.14135	3.73979	4.06097	-2.26664	-1.18056	2.26664	down	3.35967e-08	1.40951e-07
253782	CERS6	ceramide synthase 6	7.00997	7.00951	6.95076	5.43861	5.6714	5.46967	-2.7578	-1.46352	2.7578	down	1.29968e-11	1.44939e-10
5049	PAFAH1B2	platelet activating factor acetylhydrolase 1b catalytic subunit 2	8.56575	8.53181	8.61239	7.51303	7.50555	7.44428	-2.1175	-1.08236	2.1175	down	4.70569e-13	9.38029e-12
54149	C21orf91	chromosome 21 open reading frame 91	5.54589	5.60195	5.78667	6.62107	6.63905	6.70535	2.01436	1.01032	2.01436	up	2.16473e-09	1.22853e-08
4758	NEU1	neuraminidase 1 (lysosomal sialidase)	9.88713	9.86632	9.88009	11.0635	11.0197	10.9792	2.20833	1.14296	2.20833	up	2.16797e-15	1.31182e-13
29089	UBE2T	ubiquitin conjugating enzyme E2T	10.5328	10.541	10.57	8.07453	8.22279	8.13711	-5.28934	-2.40309	5.28934	down	3.62003e-18	1.30222e-15
122830	NAA30	N(alpha)-acetyltransferase 30, NatC catalytic subunit	8.3217	8.25076	8.24859	9.31219	9.27555	9.24597	2.00586	1.00422	2.00586	up	2.34194e-13	5.37946e-12
9585	KIF20B	kinesin family member 20B	8.46457	8.496	8.38508	6.23053	6.29558	6.36695	-4.44093	-2.15086	4.44093	down	1.08082e-15	7.67733e-14
7693	ZNF134	zinc finger protein 134	6.90532	6.76304	6.80652	7.83817	7.87424	8.01445	2.1199	1.08399	2.1199	up	3.83993e-11	3.61064e-10
81575	APOLD1	apolipoprotein L domain containing 1	7.17716	7.01347	7.16561	5.7633	6.02266	5.83191	-2.37203	-1.24612	2.37203	down	2.05037e-10	1.55203e-09
79366	HMGN5	high mobility group nucleosome binding domain 5	6.78379	6.72676	6.59458	5.04517	5.14703	4.9842	-3.12295	-1.64291	3.12295	down	5.56364e-12	7.10819e-11
9252	RPS6KA5	ribosomal protein S6 kinase, 90kDa, polypeptide 5	5.07333	4.95356	4.9522	3.9759	3.95256	3.95158	-2.0463	-1.03302	2.0463	down	6.29172e-09	3.15068e-08
9577	BRE	brain and reproductive organ-expressed (TNFRSF1A modulator)	8.21933	8.23299	8.17931	7.10309	7.12784	7.00426	-2.19185	-1.13215	2.19185	down	1.33372e-12	2.19631e-11
25778	DSTYK	dual serine/threonine and tyrosine protein kinase	6.69788	6.65048	6.67079	7.69132	7.75225	7.76604	2.08998	1.06349	2.08998	up	4.5232e-12	6.00592e-11
817	CAMK2D	calcium/calmodulin-dependent protein kinase II delta	8.59553	8.70885	8.68663	7.62227	7.55194	7.57115	-2.1168	-1.08188	2.1168	down	7.72693e-13	1.4033e-11
115265	DDIT4L	DNA damage inducible transcript 4 like	5.64222	5.47947	5.76786	6.84018	6.84682	6.93874	2.37084	1.2454	2.37084	up	2.43408e-10	1.8011e-09
94239	H2AFV	H2A histone family member V	9.52395	9.55077	9.58769	7.76145	7.67939	7.71252	-3.57105	-1.83635	3.57105	down	8.83597e-17	1.12499e-14
440026	TMEM41B	transmembrane protein 41B	6.34603	6.33455	6.53475	7.61375	7.6314	7.48679	2.25356	1.1722	2.25356	up	6.69456e-11	5.84618e-10
84930	MASTL	microtubule associated serine/threonine kinase like	7.96823	8.00622	8.02507	6.48807	6.53487	6.61663	-2.73837	-1.45332	2.73837	down	1.29926e-13	3.35157e-12
219899	TBCEL	tubulin folding cofactor E-like	6.42255	6.07547	6.4463	7.4811	7.46109	7.54585	2.26772	1.18124	2.26772	up	1.50347e-09	8.90635e-09
286826	LIN9	lin-9 DREAM MuvB core complex component	6.04849	6.1308	6.17305	4.48159	4.18178	4.18178	-3.56952	-1.83573	3.56952	down	1.94837e-11	2.03241e-10
3416	IDE	insulin-degrading enzyme	8.98119	9.02383	9.06281	7.30035	7.38976	7.38872	-3.16674	-1.663	3.16674	down	1.67729e-15	1.06764e-13
1657	DMXL1	Dmx-like 1	5.74114	5.7379	5.83706	6.83295	6.87543	6.90712	2.14325	1.0998	2.14325	up	7.3028e-11	6.29602e-10
2764	GMFB	glia maturation factor, beta	10.6529	10.6873	10.4566	9.4072	9.44957	9.37801	-2.27727	-1.1873	2.27727	down	1.35999e-12	2.22746e-11
4665	NAB2	NGFI-A binding protein 2 (EGR1 binding protein 2)	7.19333	7.12575	7.21777	8.36549	8.25703	8.27985	2.17624	1.12184	2.17624	up	1.38381e-12	2.25705e-11
2247	FGF2	fibroblast growth factor 2 (basic)	8.51872	8.60847	8.587	9.7363	9.72372	9.73477	2.23488	1.1602	2.23488	up	1.2686e-14	5.18684e-13
57697	FANCM	Fanconi anemia complementation group M	6.09562	6.03318	6.11505	4.74998	4.94036	4.7238	-2.42262	-1.27657	2.42262	down	3.23397e-10	2.30427e-09
79682	CENPU	centromere protein U	7.18881	7.00064	7.09069	5.28071	5.40291	5.31847	-3.38546	-1.75935	3.38546	down	7.02274e-13	1.30133e-11
138639	PTPDC1	protein tyrosine phosphatase domain containing 1	5.97739	5.86056	5.94579	4.52009	4.63677	4.57913	-2.5478	-1.34925	2.5478	down	8.57427e-11	7.23938e-10
169611	OLFML2A	olfactomedin like 2A	7.9091	7.87045	8.03478	5.58789	5.46738	5.74693	-5.05383	-2.33738	5.05383	down	3.34724e-14	1.11687e-12
5074	PAWR	PRKC, apoptosis, WT1, regulator	5.86446	5.869	5.70008	4.76366	4.38393	4.68737	-2.29664	-1.19953	2.29664	down	1.33215e-08	6.12783e-08
8089	YEATS4	YEATS domain containing 4	9.02425	8.94661	8.8833	7.6114	7.45114	7.55842	-2.65934	-1.41107	2.65934	down	1.49532e-13	3.74336e-12
83874	TBC1D10A	TBC1 domain family member 10A	5.93471	5.97817	6.04757	7.01691	7.09909	7.12071	2.13182	1.09209	2.13182	up	5.96268e-11	5.2967e-10
72	ACTG2	actin, gamma 2, smooth muscle, enteric	4.61612	4.88058	4.78041	3.27162	3.24624	3.7409	-2.53055	-1.33945	2.53055	down	5.96832e-08	2.36262e-07
8744	TNFSF9	tumor necrosis factor superfamily member 9	7.94858	7.87577	7.78378	10.0051	10.0317	9.98741	4.40354	2.13866	4.40354	up	5.24183e-17	7.6406e-15
9830	TRIM14	tripartite motif containing 14	7.04641	7.03988	7.16917	5.71667	5.86396	5.899	-2.39265	-1.25861	2.39265	down	4.36743e-11	4.04934e-10
2189	FANCG	Fanconi anemia complementation group G	7.91378	7.96383	7.97303	6.25467	6.47227	6.38175	-2.99105	-1.58065	2.99105	down	3.30796e-13	7.11104e-12
339122	RAB43	RAB43, member RAS oncogene family	7.55964	7.5663	7.52145	8.68314	8.70541	8.7588	2.2449	1.16665	2.2449	up	9.03106e-14	2.48671e-12
493	ATP2B4	ATPase, Ca++ transporting, plasma membrane 4	10.0753	10.1539	9.95559	7.68834	7.74337	7.78163	-5.00653	-2.32381	5.00653	down	9.5863e-17	1.20861e-14
55193	PBRM1	polybromo 1	8.74894	8.72321	8.51245	7.47904	7.41534	7.2662	-2.41944	-1.27467	2.41944	down	2.38295e-11	2.40503e-10
2752	GLUL	glutamate-ammonia ligase	7.74895	7.74059	7.50279	6.17204	6.27856	6.23867	-2.70261	-1.43435	2.70261	down	8.72628e-12	1.03684e-10
11096	ADAMTS5	ADAM metallopeptidase with thrombospondin type 1 motif 5	5.11131	5.14874	5.07645	8.5005	8.60485	8.65154	11.1075	3.47346	11.1075	up	5.83232e-18	1.72925e-15
1063	CENPF	centromere protein F	8.9374	8.94413	9.07513	6.69433	6.677	6.71032	-4.89623	-2.29167	4.89623	down	9.71575e-17	1.22101e-14
201299	RDM1	RAD52 motif containing 1	4.89692	5.00071	5.32732	3.47364	3.75512	3.28448	-2.97022	-1.57057	2.97022	down	1.16946e-08	5.45303e-08
51091	SEPSECS	Sep (O-phosphoserine) tRNA:Sec (selenocysteine) tRNA synthase	4.33334	4.25288	4.26384	5.34214	5.74505	5.65847	2.45979	1.29853	2.45979	up	5.35107e-09	2.7334e-08
10051	SMC4	structural maintenance of chromosomes 4	11.124	11.118	11.0473	8.93454	9.02432	9.07781	-4.24044	-2.08421	4.24044	down	2.14849e-17	4.03073e-15
81029	WNT5B	wingless-type MMTV integration site family member 5B	8.05276	8.05224	8.16878	6.93385	6.99785	6.99694	-2.16602	-1.11505	2.16602	down	2.72508e-12	3.91824e-11
126433	FBXO27	F-box protein 27	5.44319	5.61513	5.59331	4.29047	4.41262	4.50858	-2.214	-1.14665	2.214	down	3.82579e-09	2.02885e-08
54780	NSMCE4A	NSE4 homolog A, SMC5-SMC6 complex component	8.94498	8.95741	9.12897	7.78333	7.74522	7.6537	-2.43351	-1.28304	2.43351	down	1.07696e-12	1.84965e-11
11212	PROSC	proline synthetase co-transcribed homolog (bacterial)	7.15521	7.06812	7.19474	5.31648	5.50941	5.39278	-3.32449	-1.73313	3.32449	down	8.42944e-13	1.51406e-11
56000	NXF3	nuclear RNA export factor 3	4.6268	4.68697	4.6075	5.576	5.8211	5.72436	2.09468	1.06673	2.09468	up	5.35987e-09	2.73682e-08
128637	TBC1D20	TBC1 domain family member 20	7.46544	7.44129	7.54486	8.62946	8.61493	8.6307	2.20559	1.14117	2.20559	up	2.14575e-13	5.035e-12
7048	TGFBR2	transforming growth factor beta receptor II	10.6849	10.5953	10.6272	11.9164	11.9143	11.9133	2.42651	1.27888	2.42651	up	2.74965e-16	2.6425e-14
2744	GLS	glutaminase	10.1441	10.1025	10.2012	12.2236	12.2099	12.2834	4.25675	2.08975	4.25675	up	1.67764e-18	7.47502e-16
10726	NUDC	nudC nuclear distribution protein	10.5682	10.588	10.527	9.06025	8.98895	9.00855	-2.91163	-1.54183	2.91163	down	1.13215e-16	1.36607e-14
164781	DAW1	dynein assembly factor with WDR repeat domains 1	4.60996	4.56015	4.6803	3.61798	3.4852	3.47865	-2.12804	-1.08953	2.12804	down	7.2565e-09	3.56819e-08
9055	PRC1	protein regulator of cytokinesis 1	7.94361	7.97503	7.97749	5.23619	5.2019	5.34061	-6.52424	-2.70581	6.52424	down	2.35506e-16	2.36572e-14
5360	PLTP	phospholipid transfer protein	9.23122	9.30441	9.19157	10.2242	10.2634	10.2899	2.02337	1.01676	2.02337	up	1.10516e-13	2.94384e-12
51201	ZDHHC2	zinc finger, DHHC-type containing 2	7.15156	7.04385	7.13449	5.45896	4.68615	5.18472	-4.00006	-2.00002	4.00006	down	1.23709e-09	7.49132e-09
90411	MCFD2	multiple coagulation factor deficiency 2	9.70068	9.73336	9.81396	8.47292	8.40749	8.52471	-2.43001	-1.28096	2.43001	down	3.44574e-14	1.13919e-12
23404	EXOSC2	exosome component 2	8.34536	8.3174	8.42383	7.1887	7.39321	7.41214	-2.04322	-1.03085	2.04322	down	7.8759e-11	6.73532e-10
7026	NR2F2	nuclear receptor subfamily 2 group F member 2	6.79704	6.62531	6.74261	5.59527	5.76305	5.74536	-2.02852	-1.02043	2.02852	down	1.37767e-09	8.24581e-09
27113	BBC3	BCL2 binding component 3	6.33767	6.41107	6.77374	7.87391	7.84703	7.79026	2.51328	1.32957	2.51328	up	6.65505e-10	4.32457e-09
26040	SETBP1	SET binding protein 1	6.77405	6.80782	6.74525	5.32324	5.20572	5.35213	-2.79338	-1.48201	2.79338	down	4.62946e-12	6.1176e-11
10231	RCAN2	regulator of calcineurin 2	4.63073	4.45928	4.73244	3.30565	3.73595	3.38384	-2.19214	-1.13234	2.19214	down	1.7679e-07	6.35956e-07
84695	LOXL3	lysyl oxidase like 3	7.48239	7.63598	7.63557	8.63695	8.59806	8.58867	2.03249	1.02325	2.03249	up	5.50597e-12	7.05982e-11
1956	EGFR	epidermal growth factor receptor	7.05968	7.10523	7.06361	5.576	5.59624	5.55009	-2.83248	-1.50206	2.83248	down	6.38805e-13	1.20017e-11
10615	SPAG5	sperm associated antigen 5	9.24972	9.33984	9.42144	5.77533	5.576	5.43861	-13.3647	-3.74035	13.3647	down	6.73296e-17	9.26313e-15
83448	PUS7L	pseudouridylate synthase 7-like	6.94716	6.86437	6.97645	5.89363	5.86041	5.90776	-2.05917	-1.04206	2.05917	down	1.03706e-10	8.53299e-10
57019	CIAPIN1	cytokine induced apoptosis inhibitor 1	9.30955	9.36668	9.46054	8.11506	8.09735	8.07255	-2.43503	-1.28394	2.43503	down	4.36784e-14	1.38111e-12
9214	FCMR	Fc fragment of IgM receptor	5.23663	5.23563	5.56388	3.27237	3.51084	3.52291	-3.75811	-1.91001	3.75811	down	9.41689e-11	7.83941e-10
92521	SPECC1	sperm antigen with calponin homology and coiled-coil domains 1	5.74521	5.71524	5.75907	6.80648	6.8416	6.9473	2.18145	1.12529	2.18145	up	7.1401e-11	6.17459e-10
11083	DIDO1	death inducer-obliterator 1	5.10623	5.10316	5.23475	6.93313	6.90778	6.99311	3.47407	1.79663	3.47407	up	3.79725e-13	7.95922e-12
10299	MARCH6	membrane associated ring-CH-type finger 6	9.01774	9.02949	9.10265	10.1782	10.1988	10.1894	2.20201	1.13882	2.20201	up	7.83124e-15	3.55397e-13
10293	TRAIP	TRAF interacting protein	7.35062	7.34523	7.48929	5.99251	5.9647	5.98473	-2.66549	-1.4144	2.66549	down	1.44784e-12	2.34199e-11
404216	LINC01561	long intergenic non-protein coding RNA 1561	5.50038	5.4763	5.21246	4.02247	4.11008	4.13983	-2.47184	-1.30559	2.47184	down	1.82414e-09	1.05811e-08
5393	EXOSC9	exosome component 9	9.967	10.0401	10.0837	9.02055	8.94144	8.96893	-2.07527	-1.0533	2.07527	down	1.3262e-13	3.40538e-12
51248	PDZD11	PDZ domain containing 11	10.4014	10.4142	10.3736	7.3052	7.21875	7.23639	-8.83324	-3.14294	8.83324	down	3.85959e-20	1.36826e-16
83931	STK40	serine/threonine kinase 40	8.98787	9.05096	8.96311	7.56763	7.55742	7.6324	-2.66628	-1.41483	2.66628	down	9.30678e-15	4.08187e-13
4773	NFATC2	nuclear factor of activated T-cells, cytoplasmic, calcineurin-dependent 2	6.28515	6.47695	6.0858	5.40756	5.15302	4.79254	-2.24222	-1.16493	2.24222	down	5.60633e-07	1.83723e-06
55215	FANCI	Fanconi anemia complementation group I	7.41554	7.46458	7.41695	5.40191	5.41031	5.31912	-4.15614	-2.05524	4.15614	down	1.14209e-14	4.78944e-13
130507	UBR3	ubiquitin protein ligase E3 component n-recognin 3 (putative)	6.46548	6.613	6.57546	7.8479	7.80305	7.81088	2.41044	1.2693	2.41044	up	1.41491e-12	2.29724e-11
54751	FBLIM1	filamin binding LIM protein 1	6.54834	6.59663	6.56987	7.89246	7.88434	7.93552	2.51838	1.33249	2.51838	up	1.60412e-13	3.95707e-12
51809	GALNT7	polypeptide N-acetylgalactosaminyltransferase 7	9.46766	9.36229	9.33579	5.94228	5.90065	6.07777	-10.6665	-3.41501	10.6665	down	4.06304e-18	1.36911e-15
25843	MOB4	MOB family member 4, phocein	9.4353	9.45075	9.43192	8.29774	8.28949	8.26364	-2.22792	-1.1557	2.22792	down	7.64251e-15	3.4804e-13
5933	RBL1	retinoblastoma-like 1	6.89132	6.56857	6.79055	4.47233	4.60812	4.69571	-4.46325	-2.15809	4.46325	down	2.02175e-12	3.07616e-11
145389	SLC38A6	solute carrier family 38, member 6	8.79081	8.89204	8.70461	10.1038	10.0866	10.0768	2.4508	1.29325	2.4508	up	5.00409e-14	1.5474e-12
26084	ARHGEF26	Rho guanine nucleotide exchange factor 26	5.02027	5.18412	5.33572	3.87487	3.87487	3.71297	-2.56531	-1.35913	2.56531	down	1.83003e-09	1.061e-08
79794	C12orf49	chromosome 12 open reading frame 49	7.73382	7.60294	7.74655	9.03668	9.02431	9.13131	2.5841	1.36966	2.5841	up	1.05407e-13	2.83665e-12
54820	NDE1	nudE neurodevelopment protein 1	6.74486	6.75345	6.69446	5.58403	5.6471	5.77793	-2.08672	-1.06124	2.08672	down	4.184e-10	2.88625e-09
163050	ZNF564	zinc finger protein 564	5.00229	5.084	5.08967	6.10955	6.21522	6.3901	2.2652	1.17964	2.2652	up	1.22495e-09	7.42409e-09
3075	CFH	complement factor H	7.52947	7.44866	7.35247	8.63912	8.59632	8.54164	2.21733	1.14883	2.21733	up	2.24497e-12	3.34559e-11
284273	ZADH2	zinc binding alcohol dehydrogenase domain containing 2	6.70274	6.62738	6.71791	5.16076	5.43622	5.44933	-2.52084	-1.33391	2.52084	down	2.53443e-10	1.86725e-09
11169	WDHD1	WD repeat and HMG-box DNA binding protein 1	5.61626	5.52355	5.75988	3.66853	4.06103	3.66853	-3.56491	-1.83387	3.56491	down	2.18317e-10	1.63769e-09
55194	EVA1B	eva-1 homolog B (C. elegans)	6.61065	6.50829	6.64165	7.93323	7.89606	7.92781	2.51781	1.33217	2.51781	up	4.62343e-13	9.25395e-12
130399	ACVR1C	activin A receptor type IC	4.8223	4.55201	4.55802	6.85078	6.9192	7.06431	4.92681	2.30065	4.92681	up	5.13854e-13	1.00643e-11
55055	ZWILCH	zwilch kinetochore protein	8.34536	8.51881	8.33889	6.68934	6.78837	6.7631	-3.14723	-1.65408	3.14723	down	7.84416e-14	2.20905e-12
5321	PLA2G4A	phospholipase A2 group IVA	7.2965	7.35904	7.39834	5.86045	6.00363	6.25112	-2.48439	-1.31289	2.48439	down	3.70912e-10	2.59426e-09
29028	ATAD2	ATPase family, AAA domain containing 2	8.11823	8.02164	7.82068	4.98492	4.8941	4.83716	-8.46469	-3.08146	8.46469	down	1.74493e-15	1.10175e-13
2618	GART	phosphoribosylglycinamide formyltransferase, phosphoribosylglycinamide synthetase, phosphoribosylaminoimidazole synthetase	7.70041	7.72635	7.6363	6.44588	6.43647	6.42127	-2.38361	-1.25315	2.38361	down	8.47108e-13	1.51945e-11
1857	DVL3	dishevelled segment polarity protein 3	7.29722	7.34865	7.29273	8.2795	8.28017	8.39088	2.00553	1.00398	2.00553	up	4.34943e-12	5.81258e-11
9179	AP4M1	adaptor-related protein complex 4, mu 1 subunit	6.31656	6.23607	6.38264	5.37077	5.24299	5.18831	-2.06251	-1.0444	2.06251	down	1.90742e-09	1.09969e-08
53340	SPA17	sperm autoantigenic protein 17	7.16455	7.07465	7.15607	6.0606	5.97897	6.055	-2.14389	-1.10023	2.14389	down	3.42635e-11	3.27516e-10
23463	ICMT	isoprenylcysteine carboxyl methyltransferase	8.85091	8.80968	8.86565	7.46794	7.51359	7.59082	-2.49314	-1.31796	2.49314	down	4.49794e-14	1.41886e-12
6690	SPINK1	serine peptidase inhibitor, Kazal type 1	6.50424	6.60294	6.47894	7.88658	7.91154	7.89787	2.58463	1.36996	2.58463	up	2.87139e-13	6.35368e-12
7762	ZNF215	zinc finger protein 215	4.89031	4.96501	5.00936	3.81504	4.0056	4.01399	-2.01393	-1.01002	2.01393	down	2.25691e-08	9.83588e-08
6240	RRM1	ribonucleotide reductase M1	10.2383	10.2749	10.2269	9.01943	9.00384	9.06504	-2.32503	-1.21725	2.32503	down	2.10087e-15	1.28912e-13
55148	UBR7	ubiquitin protein ligase E3 component n-recognin 7 (putative)	7.87232	7.94858	7.93026	6.23591	6.20733	6.31534	-3.16936	-1.66419	3.16936	down	3.32392e-14	1.11109e-12
65010	SLC26A6	solute carrier family 26 (anion exchanger), member 6	6.96582	7.12876	6.98294	8.70484	8.7426	8.75668	3.26904	1.70887	3.26904	up	9.52267e-15	4.14883e-13
4615	MYD88	myeloid differentiation primary response 88	6.79606	6.92404	6.93116	4.75815	5.05381	5.0168	-3.83927	-1.94083	3.83927	down	2.87124e-12	4.09387e-11
2710	GK	glycerol kinase	6.16571	6.08387	6.04833	4.63172	4.44624	4.22499	-3.17111	-1.66499	3.17111	down	1.4387e-10	1.13846e-09
5738	PTGFRN	prostaglandin F2 receptor inhibitor	10.086	10.2095	9.97392	6.89855	6.81638	6.91419	-9.27566	-3.21345	9.27566	down	6.25622e-18	1.76479e-15
5880	RAC2	ras-related C3 botulinum toxin substrate 2 (rho family, small GTP binding protein Rac2)	11.5075	11.6084	11.6022	9.10412	9.0842	9.12852	-5.52926	-2.46709	5.52926	down	2.711e-19	2.79732e-16
132864	CPEB2	cytoplasmic polyadenylation element binding protein 2	6.947	6.9989	6.97922	8.07821	8.06164	8.21229	2.20739	1.14234	2.20739	up	3.0141e-12	4.26346e-11
3987	LIMS1	LIM and senescent cell antigen-like domains 1	10.3577	10.2614	10.0854	8.69931	8.6883	8.73537	-2.88223	-1.52719	2.88223	down	1.3109e-13	3.37938e-12
2135	EXTL2	exostosin-like glycosyltransferase 2	9.65293	9.67218	9.58055	7.92908	7.90042	7.85316	-3.34267	-1.741	3.34267	down	2.39701e-16	2.39762e-14
6996	TDG	thymine DNA glycosylase	6.515	6.61795	6.66585	7.90811	7.83947	7.91945	2.44428	1.28941	2.44428	up	1.36275e-12	2.22918e-11
22995	CEP152	centrosomal protein 152kDa	8.00095	7.88706	7.9873	5.95891	6.22727	5.99695	-3.72539	-1.89739	3.72539	down	2.72374e-13	6.07841e-12
55083	KIF26B	kinesin family member 26B	3.95226	3.77952	4.28538	5.43016	5.30387	5.37858	2.57603	1.36515	2.57603	up	1.20305e-08	5.5937e-08
445	ASS1	argininosuccinate synthase 1	7.36226	7.32132	7.46185	9.02461	8.97691	9.01521	3.08179	1.62377	3.08179	up	4.10782e-15	2.11931e-13
57587	CFAP97	cilia and flagella associated protein 97	8.66656	8.53701	8.44008	7.38911	7.19108	7.25334	-2.41168	-1.27004	2.41168	down	1.12817e-11	1.28854e-10
64841	GNPNAT1	glucosamine-phosphate N-acetyltransferase 1	9.2433	9.26461	9.27046	7.93268	7.85918	7.90414	-2.56826	-1.36079	2.56826	down	3.12645e-15	1.73545e-13
10152	ABI2	abl-interactor 2	8.469	8.40922	8.45051	6.81791	6.8752	6.83614	-3.03107	-1.59983	3.03107	down	4.47472e-15	2.26978e-13
79023	NUP37	nucleoporin 37kDa	8.90553	8.94993	9.02596	7.89494	7.97367	7.96093	-2.02412	-1.01729	2.02412	down	1.14511e-12	1.94539e-11
6652	SORD	sorbitol dehydrogenase	9.52127	9.53707	9.6247	8.3236	8.41254	8.43596	-2.25061	-1.17031	2.25061	down	1.24051e-13	3.23532e-12
2971	GTF3A	general transcription factor IIIA	9.69185	9.78578	9.53824	8.69638	8.65278	8.63046	-2.01682	-1.01208	2.01682	down	1.80707e-11	1.90985e-10
4957	ODF2	outer dense fiber of sperm tails 2	6.60237	6.46212	6.57254	5.14539	5.25325	5.43775	-2.40641	-1.26688	2.40641	down	5.03298e-10	3.38961e-09
55751	TMEM184C	transmembrane protein 184C	9.22102	9.19529	9.15226	7.27569	7.20565	7.31724	-3.79298	-1.92333	3.79298	down	2.26608e-16	2.29594e-14
155054	ZNF425	zinc finger protein 425	5.68147	5.54726	5.67273	6.86258	6.78516	6.85619	2.29871	1.20082	2.29871	up	4.7432e-11	4.34636e-10
6047	RNF4	ring finger protein 4	9.41229	9.61076	9.30956	8.43326	8.38139	8.37302	-2.06811	-1.04831	2.06811	down	7.36727e-11	6.34601e-10
10468	FST	follistatin	6.19294	6.31686	6.2032	7.40746	7.47392	7.44181	2.30281	1.2034	2.30281	up	6.50835e-12	8.11164e-11
8914	TIMELESS	timeless circadian clock	8.37137	8.25597	8.3681	6.85668	6.964	6.90142	-2.68412	-1.42445	2.68412	down	1.2485e-13	3.24628e-12
29078	NDUFAF4	NADH dehydrogenase (ubiquinone) complex I, assembly factor 4	5.33466	5.0764	5.23487	4.03792	4.19611	4.29564	-2.05445	-1.03875	2.05445	down	4.57245e-08	1.86174e-07
117854	TRIM6	tripartite motif containing 6	7.44805	7.55657	7.51875	5.70441	5.81278	5.54853	-3.5289	-1.81922	3.5289	down	5.73278e-13	1.09823e-11
10946	SF3A3	splicing factor 3a subunit 3	8.65502	8.75905	8.83637	6.79889	6.69093	6.77231	-3.98921	-1.9961	3.98921	down	3.09168e-15	1.72931e-13
8364	HIST1H4C	histone cluster 1, H4c	12.7572	12.8206	12.7254	10.7096	10.7376	10.7279	-4.12006	-2.04267	4.12006	down	5.65552e-19	3.99934e-16
10200	MPHOSPH6	M-phase phosphoprotein 6	4.16211	3.65279	4.01433	5.09809	5.11496	5.15711	2.26625	1.18031	2.26625	up	7.68999e-08	2.97773e-07
80174	DBF4B	DBF4 zinc finger B	7.16413	7.17236	7.1595	5.39227	5.30576	5.37644	-3.49956	-1.80717	3.49956	down	7.97085e-14	2.24041e-12
51659	GINS2	GINS complex subunit 2 (Psf2 homolog)	8.87961	8.84808	8.94259	5.22568	5.25221	5.19786	-12.6832	-3.66484	12.6832	down	5.69502e-19	3.99934e-16
10300	KATNB1	katanin p80 (WD repeat containing) subunit B 1	7.68353	7.6128	7.64687	6.50837	6.53566	6.70659	-2.091	-1.06419	2.091	down	6.54496e-11	5.72958e-10
9204	ZMYM6	zinc finger, MYM-type 6	6.44012	6.53846	6.40134	7.55614	7.54626	7.52699	2.11867	1.08316	2.11867	up	1.43288e-11	1.5698e-10
283373	ANKRD52	ankyrin repeat domain 52	7.73761	7.73287	7.67134	8.98849	9.12508	8.97439	2.48868	1.31538	2.48868	up	1.1556e-13	3.0451e-12
57583	TMEM181	transmembrane protein 181	8.00725	7.99405	8.01236	6.85619	6.89323	6.89771	-2.17675	-1.12218	2.17675	down	6.32564e-13	1.19158e-11
51773	RSF1	remodeling and spacing factor 1	5.69446	5.56666	5.55214	7.03249	6.93198	7.06561	2.64929	1.40561	2.64929	up	8.47719e-12	1.01092e-10
2250	FGF5	fibroblast growth factor 5	5.05537	4.74103	5.03963	3.91543	3.97808	3.85403	-2.04131	-1.0295	2.04131	down	6.8348e-08	2.67725e-07
22990	PCNX	pecanex homolog (Drosophila)	7.4538	7.41769	7.43038	8.73487	8.7261	8.65036	2.41131	1.26982	2.41131	up	4.03073e-14	1.29651e-12
55784	MCTP2	multiple C2 domains, transmembrane 2	5.67935	5.47423	5.69432	6.73333	6.6239	6.73498	2.11614	1.08144	2.11614	up	1.04802e-09	6.45608e-09
64785	GINS3	GINS complex subunit 3 (Psf3 homolog)	8.87359	8.99775	8.88044	7.76279	7.88998	7.82348	-2.13146	-1.09184	2.13146	down	1.68581e-12	2.65465e-11
4298	MLLT1	myeloid/lymphoid or mixed-lineage leukemia; translocated to, 1	8.89361	8.94551	8.88509	7.48998	7.57356	7.49825	-2.6162	-1.38747	2.6162	down	1.16106e-14	4.84827e-13
23594	ORC6	origin recognition complex subunit 6	9.1718	9.06488	9.01446	6.95657	7.03591	6.94882	-4.29685	-2.10328	4.29685	down	4.42851e-16	3.83316e-14
10410	IFITM3	interferon induced transmembrane protein 3	8.57002	8.5881	8.68943	7.48873	7.55514	7.58084	-2.10567	-1.07428	2.10567	down	1.54604e-12	2.47298e-11
3589	IL11	interleukin 11	7.44761	7.4428	7.60258	8.5249	8.54648	8.47163	2.02325	1.01667	2.02325	up	1.00574e-11	1.16672e-10
10964	IFI44L	interferon induced protein 44 like	8.00979	8.05966	8.04265	6.8514	6.98901	7.07262	-2.09414	-1.06636	2.09414	down	3.05387e-11	2.97201e-10
5238	PGM3	phosphoglucomutase 3	7.02961	7.01947	7.18938	5.87334	5.72297	6.03841	-2.29938	-1.20125	2.29938	down	7.56508e-10	4.85319e-09
5054	SERPINE1	serpin peptidase inhibitor, clade E (nexin, plasminogen activator inhibitor type 1), member 1	10.3116	10.3426	10.3354	8.64129	8.61455	8.67494	-3.21827	-1.68628	3.21827	down	2.37685e-17	4.35497e-15
24137	KIF4A	kinesin family member 4A	9.10924	9.04639	9.29721	5.41048	5.6492	5.49025	-12.4175	-3.6343	12.4175	down	6.82101e-17	9.31888e-15
857	CAV1	caveolin 1	12.2411	12.2729	12.3105	10.0927	10.0827	10.0441	-4.60007	-2.20166	4.60007	down	1.63014e-19	2.27954e-16
83857	TMTC1	transmembrane and tetratricopeptide repeat containing 1	7.07625	6.85887	6.93898	8.03512	7.96123	7.93364	2.02599	1.01863	2.02599	up	8.44841e-11	7.14543e-10
8697	CDC23	cell division cycle 23	5.75951	5.8091	5.72395	4.0899	4.46293	4.13786	-2.89579	-1.53396	2.89579	down	4.7247e-10	3.21233e-09
79022	TMEM106C	transmembrane protein 106C	9.81927	9.94276	9.97607	8.32469	8.3122	8.36222	-2.989	-1.57966	2.989	down	2.65791e-15	1.54167e-13
9582	APOBEC3B	apolipoprotein B mRNA editing enzyme, catalytic polypeptide-like 3B	8.98244	9.02645	9.05138	6.37065	6.74229	6.76715	-5.25392	-2.39339	5.25392	down	9.87451e-14	2.68316e-12
80179	MYO19	myosin XIX	8.55332	8.63737	8.66621	7.39798	7.41261	7.43118	-2.30544	-1.20504	2.30544	down	1.49055e-13	3.73685e-12
1017	CDK2	cyclin-dependent kinase 2	8.32767	8.35404	8.33509	6.74868	6.76035	6.89094	-2.90582	-1.53894	2.90582	down	4.0072e-14	1.29106e-12
10426	TUBGCP3	tubulin, gamma complex associated protein 3	7.12782	7.29801	7.35638	5.8791	6.05338	6.01529	-2.42527	-1.27815	2.42527	down	7.30541e-11	6.29688e-10
10383	TUBB4B	tubulin, beta 4B class IVb	12.2037	12.2802	12.2241	11.0878	11.1501	11.2138	-2.12197	-1.0854	2.12197	down	2.45499e-14	8.74296e-13
22800	RRAS2	related RAS viral (r-ras) oncogene homolog 2	9.36378	9.40911	9.20872	7.95828	7.91677	7.81773	-2.69374	-1.42961	2.69374	down	2.65268e-13	5.95714e-12
84135	UTP15	UTP15, U3 small nucleolar ribonucleoprotein, homolog (S. cerevisiae)	7.2451	7.2659	7.27662	6.20178	6.24659	6.24861	-2.04233	-1.03021	2.04233	down	2.24377e-11	2.2917e-10
9709	HERPUD1	homocysteine-inducible, endoplasmic reticulum stress-inducible, ubiquitin-like domain member 1	8.97293	9.09571	9.07299	10.1683	10.1849	10.1683	2.18353	1.12666	2.18353	up	3.26042e-14	1.09829e-12
5553	PRG2	proteoglycan 2, bone marrow (natural killer cell activator, eosinophil granule major basic protein)	7.81791	8.03757	7.83523	6.87506	6.86137	6.92919	-2.01163	-1.00836	2.01163	down	1.43175e-10	1.13389e-09
1052	CEBPD	CCAAT/enhancer binding protein (C/EBP), delta	4.58432	4.74158	4.45679	5.61086	5.87945	6.12522	2.42438	1.27761	2.42438	up	4.09826e-08	1.68573e-07
6774	STAT3	signal transducer and activator of transcription 3 (acute-phase response factor)	8.25733	8.34519	8.33144	9.40894	9.43361	9.42344	2.15947	1.11068	2.15947	up	4.08628e-14	1.31008e-12
91687	CENPL	centromere protein L	8.32892	8.496	8.48209	7.14306	7.20614	7.22274	-2.37022	-1.24502	2.37022	down	1.15354e-12	1.95802e-11
54852	PAQR5	progestin and adipoQ receptor family member V	6.3277	6.27634	6.17918	5.05643	5.26912	5.31824	-2.06548	-1.04648	2.06548	down	6.17357e-09	3.09904e-08
146909	KIF18B	kinesin family member 18B	5.98192	6.11961	6.03883	4.65382	4.81194	4.86885	-2.40925	-1.26858	2.40925	down	4.2326e-10	2.91517e-09
54541	DDIT4	DNA damage inducible transcript 4	10.0287	10.0292	10.1051	11.3799	11.3754	11.3499	2.48646	1.31409	2.48646	up	3.30419e-16	3.0217e-14
1945	EFNA4	ephrin-A4	5.75972	5.81418	5.65051	6.7974	6.73807	6.71615	2.01261	1.00907	2.01261	up	5.30667e-10	3.54713e-09
22858	ICK	intestinal cell (MAK-like) kinase	5.90776	5.68097	5.71993	4.28938	4.04355	4.05966	-3.11383	-1.63869	3.11383	down	1.09746e-10	8.95531e-10
57474	ZNF490	zinc finger protein 490	5.70084	5.51477	5.50268	6.6275	6.59769	6.76105	2.12773	1.08932	2.12773	up	1.12142e-09	6.85867e-09
54205	CYCS	cytochrome c, somatic	12.0065	11.9074	11.8004	10.4383	10.4345	10.3774	-2.80508	-1.48804	2.80508	down	8.47135e-15	3.78748e-13
7461	CLIP2	CAP-Gly domain containing linker protein 2	5.84221	5.78667	6.03829	6.93297	6.9012	6.9416	2.05082	1.0362	2.05082	up	9.37633e-10	5.85579e-09
100529241	HSPE1-MOB4	HSPE1-MOB4 readthrough	9.4353	9.45075	9.43192	8.29774	8.28949	8.26364	-2.22792	-1.1557	2.22792	down	7.64251e-15	3.4804e-13
7428	VHL	von Hippel-Lindau tumor suppressor, E3 ubiquitin protein ligase	8.11492	7.9583	8.16352	9.1942	9.12228	9.09197	2.08094	1.05724	2.08094	up	8.79902e-12	1.04359e-10
387103	CENPW	centromere protein W	10.4481	10.3901	10.5132	8.74999	8.77043	8.65118	-3.30946	-1.7266	3.30946	down	5.74658e-16	4.60784e-14
100288152	LOC100288152	uncharacterized LOC100288152	7.07184	7.07237	7.24728	8.66391	8.61502	8.64749	2.85135	1.51164	2.85135	up	8.6187e-14	2.38995e-12
80210	ARMC9	armadillo repeat containing 9	8.98306	9.12467	9.01044	10.4783	10.5643	10.5553	2.81522	1.49325	2.81522	up	3.42985e-15	1.85496e-13
26255	PTTG3P	pituitary tumor-transforming 3, pseudogene	6.22026	6.05189	6.16635	4.75429	5.08517	4.851	-2.37734	-1.24935	2.37734	down	2.29763e-09	1.29514e-08
55334	SLC39A9	solute carrier family 39, member 9	7.36143	7.36372	7.39624	8.7308	8.78028	8.78019	2.62071	1.38996	2.62071	up	6.85481e-15	3.18079e-13
60491	NIF3L1	NGG1 interacting factor 3 like 1	8.5782	8.73186	8.61404	7.00672	7.05373	6.91731	-3.13568	-1.64878	3.13568	down	3.40341e-14	1.12996e-12
2048	EPHB2	EPH receptor B2	7.45731	7.44847	7.48358	6.45111	6.44695	6.06146	-2.20883	-1.14328	2.20883	down	3.70108e-09	1.97093e-08
2113	ETS1	v-ets avian erythroblastosis virus E26 oncogene homolog 1	9.42475	9.36799	9.31538	7.93644	7.90616	7.82122	-2.79226	-1.48143	2.79226	down	8.49501e-15	3.79373e-13
9936	CD302	CD302 molecule	8.15331	8.09207	8.18985	5.67029	5.92223	5.86089	-5.01856	-2.32727	5.01856	down	8.6627e-15	3.8534e-13
51147	ING4	inhibitor of growth family member 4	7.14357	7.27076	7.39444	8.34932	8.32299	8.3164	2.0849	1.05998	2.0849	up	3.65299e-11	3.45808e-10
8706	B3GALNT1	beta-1,3-N-acetylgalactosaminyltransferase 1 (globoside blood group)	8.91833	8.89628	9.07019	7.65966	7.71907	7.66613	-2.42836	-1.27998	2.42836	down	3.08749e-13	6.72932e-12
84542	KIAA1841	KIAA1841	7.41586	7.26264	7.43857	6.19823	6.21214	6.31314	-2.19039	-1.13119	2.19039	down	6.21183e-11	5.48325e-10
5324	PLAG1	pleiomorphic adenoma gene 1	6.33455	6.25181	6.14493	7.34673	7.44365	7.36627	2.20654	1.14179	2.20654	up	4.23095e-11	3.93864e-10
3434	IFIT1	interferon induced protein with tetratricopeptide repeats 1	6.90532	6.8557	6.95473	7.92359	7.89684	7.947	2.02402	1.01723	2.02402	up	5.66928e-12	7.21963e-11
10396	ATP8A1	ATPase, aminophospholipid transporter (APLT), class I, type 8A, member 1	4.18846	4.41242	4.25019	5.18379	5.47178	5.47178	2.13183	1.09209	2.13183	up	3.50548e-08	1.46379e-07
8455	ATRN	attractin	6.76204	6.84401	6.72962	7.98724	7.98608	7.93364	2.28221	1.19043	2.28221	up	1.16808e-12	1.97714e-11
26271	FBXO5	F-box protein 5	9.41728	9.33919	9.34844	6.88228	6.77871	6.83219	-5.80479	-2.53724	5.80479	down	7.44456e-18	1.97231e-15
10423	CDIPT	CDP-diacylglycerol--inositol 3-phosphatidyltransferase	9.05356	9.04753	9.07257	7.27627	7.27079	7.12727	-3.56304	-1.83311	3.56304	down	1.45691e-15	9.60161e-14
9236	CCPG1	cell cycle progression 1	5.61577	5.71174	5.53162	6.92234	6.80394	6.78472	2.3251	1.21729	2.3251	up	9.83686e-11	8.15643e-10
3017	HIST1H2BD	histone cluster 1, H2bd	8.07719	8.0896	8.08595	9.74491	9.81681	9.81435	3.26657	1.70778	3.26657	up	7.50494e-17	1.00292e-14
3491	CYR61	cysteine-rich, angiogenic inducer, 61	9.1548	9.20629	9.19875	6.35841	6.42127	6.63327	-6.5688	-2.71563	6.5688	down	3.65568e-16	3.27258e-14
2217	FCGRT	Fc fragment of IgG, receptor, transporter, alpha	6.52476	6.5577	6.67325	8.2848	8.23219	8.2441	3.17875	1.66846	3.17875	up	2.21156e-14	8.05902e-13
10325	RRAGB	Ras-related GTP binding B	6.50581	6.2958	6.60754	8.14522	8.10812	8.09366	3.12954	1.64595	3.12954	up	1.32288e-12	2.18492e-11
57820	CCNB1IP1	cyclin B1 interacting protein 1, E3 ubiquitin protein ligase	8.12171	8.11362	8.20841	7.12239	7.18194	7.13587	-2.00164	-1.00118	2.00164	down	4.46203e-12	5.94281e-11
7008	TEF	thyrotrophic embryonic factor	7.64706	7.50279	7.6969	8.72219	8.7704	8.77974	2.20665	1.14186	2.20665	up	2.35619e-12	3.48759e-11
152137	CCDC50	coiled-coil domain containing 50	8.33711	8.36186	8.2028	7.26197	7.27373	7.34757	-2.00857	-1.00617	2.00857	down	1.57629e-11	1.70116e-10
202	AIM1	absent in melanoma 1	10.7631	10.8088	10.8672	9.7165	9.74853	9.71574	-2.12305	-1.08614	2.12305	down	1.21914e-14	5.04247e-13
6168	RPL37A	ribosomal protein L37a	6.90832	7.08727	7.08713	5.82972	5.89646	5.82972	-2.25888	-1.17561	2.25888	down	7.64537e-11	6.55676e-10
5861	RAB1A	RAB1A, member RAS oncogene family	8.17141	7.95344	7.89669	7.01094	6.74923	6.81211	-2.21876	-1.14975	2.21876	down	6.83738e-10	4.43277e-09
57700	FAM160B1	family with sequence similarity 160 member B1	6.27558	6.05129	6.13988	7.46211	7.47336	7.56429	2.53913	1.34434	2.53913	up	9.73897e-12	1.13549e-10
552889	ATXN7L3B	ataxin 7-like 3B	7.67143	7.74291	7.59796	8.92504	8.92022	8.92442	2.38247	1.25246	2.38247	up	8.73358e-14	2.41839e-12
64755	C16orf58	chromosome 16 open reading frame 58	7.80695	7.84411	7.86266	6.71622	6.86171	6.81677	-2.05576	-1.03967	2.05576	down	1.36168e-11	1.50696e-10
5879	RAC1	ras-related C3 botulinum toxin substrate 1 (rho family, small GTP binding protein Rac1)	7.42241	7.35372	7.44909	5.88633	5.8994	5.83278	-2.89903	-1.53557	2.89903	down	2.9289e-13	6.45543e-12
116832	RPL39L	ribosomal protein L39 like	8.7137	8.62827	8.66852	6.32847	6.52634	6.35965	-4.80769	-2.26534	4.80769	down	1.26229e-15	8.50416e-14
155066	ATP6V0E2	ATPase, H+ transporting V0 subunit e2	8.56028	8.51153	8.6307	7.52986	7.58096	7.57372	-2.00832	-1.00599	2.00832	down	1.86762e-12	2.88982e-11
23743	BHMT2	betaine--homocysteine S-methyltransferase 2	7.65162	7.68602	7.683	8.72722	8.72634	8.72521	2.07442	1.05271	2.07442	up	1.33422e-13	3.41878e-12
55273	TMEM100	transmembrane protein 100	8.0315	7.95448	8.09308	6.70087	6.82584	6.76611	-2.39841	-1.26208	2.39841	down	1.55625e-12	2.48556e-11
7095	SEC62	SEC62 homolog, preprotein translocation factor	6.12429	6.28585	5.92206	4.04457	4.0616	3.98761	-4.22653	-2.07947	4.22653	down	4.608e-12	6.09787e-11
55128	TRIM68	tripartite motif containing 68	7.77035	7.75508	7.71501	6.52197	6.64494	6.62777	-2.21697	-1.14859	2.21697	down	4.11359e-12	5.57147e-11
148898	ZNF436-AS1	ZNF436 antisense RNA 1	6.82706	6.82592	6.79158	8.01049	8.11471	8.09785	2.39412	1.2595	2.39412	up	3.49722e-13	7.44036e-12
29899	GPSM2	G-protein signaling modulator 2	9.03216	9.0498	9.05269	7.78671	7.7031	7.68314	-2.49764	-1.32057	2.49764	down	1.51815e-14	5.94689e-13
3673	ITGA2	integrin, alpha 2 (CD49B, alpha 2 subunit of VLA-2 receptor)	8.97164	8.94895	9.00671	10.8393	10.8325	10.8272	3.62314	1.85724	3.62314	up	2.70459e-18	1.03968e-15
55789	DEPDC1B	DEP domain containing 1B	9.27339	9.22398	9.18585	6.95746	7.04661	7.13586	-4.53498	-2.1811	4.53498	down	3.1221e-16	2.90778e-14
10892	MALT1	MALT1 paracaspase	8.10067	8.04011	7.95125	9.2407	9.15476	9.23557	2.26524	1.17967	2.26524	up	3.03861e-13	6.63755e-12
2175	FANCA	Fanconi anemia complementation group A	7.69838	7.59474	7.62183	6.13963	6.27933	6.36695	-2.5961	-1.37635	2.5961	down	5.62657e-12	7.18068e-11
5471	PPAT	phosphoribosyl pyrophosphate amidotransferase	8.18349	8.20834	8.1602	7.07011	7.08507	7.06765	-2.15806	-1.10973	2.15806	down	4.10518e-13	8.46289e-12
401541	CENPP	centromere protein P	7.604	7.61767	7.78578	6.58019	6.43307	6.50557	-2.23903	-1.16287	2.23903	down	3.64593e-11	3.4539e-10
10443	N4BP2L2	NEDD4 binding protein 2-like 2	6.82827	6.77056	6.83651	8.04607	8.11088	8.1252	2.43221	1.28227	2.43221	up	2.33078e-13	5.36637e-12
728712	SPANXA2	SPANX family member A2	3.32433	3.67032	3.95257	5.18786	5.25994	5.41988	3.11699	1.64015	3.11699	up	8.01859e-09	3.90085e-08
5058	PAK1	p21 protein (Cdc42/Rac)-activated kinase 1	7.54393	7.60636	7.49825	6.21902	6.21891	6.28915	-2.47453	-1.30715	2.47453	down	1.40818e-12	2.28821e-11
6470	SHMT1	serine hydroxymethyltransferase 1 (soluble)	7.41181	7.39127	7.28275	5.44038	5.62503	5.71096	-3.41011	-1.76982	3.41011	down	1.58313e-12	2.52233e-11
144193	AMDHD1	amidohydrolase domain containing 1	4.27814	4.3308	4.49419	3.62884	3.24425	3.11442	-2.05415	-1.03854	2.05415	down	8.80841e-07	2.78441e-06
10767	HBS1L	HBS1 like translational GTPase	8.18393	8.19245	8.05979	7.06668	6.89372	6.78402	-2.34662	-1.23058	2.34662	down	4.25627e-11	3.95939e-10
9282	MED14	mediator complex subunit 14	7.85455	7.76975	7.67983	6.56084	6.61599	6.37937	-2.37728	-1.24931	2.37728	down	4.1019e-11	3.83581e-10
3836	KPNA1	karyopherin alpha 1	8.497	8.42222	8.49254	6.64332	6.66856	6.67872	-3.49927	-1.80705	3.49927	down	1.21586e-15	8.31852e-14
340481	ZDHHC21	zinc finger, DHHC-type containing 21	5.15803	5.09445	5.27375	3.78825	4.02889	4.15526	-2.27302	-1.18461	2.27302	down	1.75826e-08	7.87002e-08
54464	XRN1	5'-3' exoribonuclease 1	8.26163	8.06808	8.17992	7.03323	6.97187	7.01619	-2.23888	-1.16278	2.23888	down	4.53453e-12	6.01445e-11
57630	SH3RF1	SH3 domain containing ring finger 1	7.40448	7.34416	7.0349	6.33635	6.26777	6.14424	-2.01632	-1.01173	2.01632	down	1.74591e-08	7.82012e-08
63917	GALNT11	polypeptide N-acetylgalactosaminyltransferase 11	3.99554	3.84332	3.64645	4.8745	4.92266	4.75302	2.0302	1.02162	2.0302	up	9.62488e-08	3.65548e-07
11340	EXOSC8	exosome component 8	10.1387	10.159	10.1747	8.98517	8.99808	9.05633	-2.21035	-1.14427	2.21035	down	5.66615e-15	2.74968e-13
1788	DNMT3A	DNA (cytosine-5-)-methyltransferase 3 alpha	4.30295	4.36237	4.81155	5.51811	5.70606	5.87636	2.30999	1.20789	2.30999	up	2.20544e-07	7.80394e-07
7004	TEAD4	TEA domain family member 4	7.68286	7.5981	7.85132	6.65394	6.72452	6.71926	-2.01603	-1.01152	2.01603	down	2.7232e-10	1.98322e-09
1490	CTGF	connective tissue growth factor	9.46472	9.35313	9.39863	6.91581	6.77208	6.69579	-6.10899	-2.61093	6.10899	down	1.29107e-16	1.51114e-14
55294	FBXW7	F-box and WD repeat domain containing 7	7.28152	7.39091	7.43219	9.31432	9.31535	9.31228	3.85245	1.94578	3.85245	up	2.93234e-16	2.78395e-14
23621	BACE1	beta-site APP-cleaving enzyme 1	7.61069	7.48	7.5864	5.77691	5.90167	5.81266	-3.3141	-1.72862	3.3141	down	1.45601e-13	3.66667e-12
642852	LOC642852	uncharacterized LOC642852	7.72805	7.72951	7.74851	8.81723	8.83866	8.82674	2.13197	1.09219	2.13197	up	6.14663e-14	1.8226e-12
79877	DCAKD	dephospho-CoA kinase domain containing	6.94685	6.9636	7.11151	5.01608	4.84737	4.92959	-4.21726	-2.07631	4.21726	down	1.86515e-13	4.48867e-12
5293	PIK3CD	phosphatidylinositol-4,5-bisphosphate 3-kinase, catalytic subunit delta	7.69497	7.92178	7.93446	6.63368	6.1854	6.28435	-2.79451	-1.48259	2.79451	down	6.26688e-10	4.09814e-09
991	CDC20	cell division cycle 20	9.75638	9.90847	9.72518	6.80885	6.80183	6.71549	-8.11891	-3.02129	8.11891	down	6.08031e-18	1.75559e-15
4940	OAS3	2'-5'-oligoadenylate synthetase 3	7.18158	7.10493	7.06987	4.92368	4.95164	4.88795	-4.58748	-2.1977	4.58748	down	1.67554e-14	6.41583e-13
23741	EID1	EP300 interacting inhibitor of differentiation 1	10.9041	10.8765	10.8808	9.6135	9.56672	9.471	-2.52575	-1.33671	2.52575	down	3.38896e-15	1.83537e-13
6638	SNRPN	small nuclear ribonucleoprotein polypeptide N	8.96725	8.98856	9.09389	10.2318	10.2587	10.3507	2.40129	1.26381	2.40129	up	4.65212e-14	1.45578e-12
3841	KPNA5	karyopherin alpha 5 (importin alpha 6)	6.06685	6.08199	6.15502	7.60474	7.7629	7.75906	3.04747	1.60761	3.04747	up	2.9076e-13	6.41932e-12
79180	EFHD2	EF-hand domain family member D2	8.67433	8.61527	8.76878	7.06691	7.00554	7.13842	-3.06489	-1.61584	3.06489	down	3.20537e-14	1.08161e-12
57722	IGDCC4	immunoglobulin superfamily, DCC subclass, member 4	5.80093	5.69377	5.72635	7.93528	8.03979	7.88565	4.6371	2.21322	4.6371	up	3.73982e-15	1.9736e-13
79139	DERL1	derlin 1	8.90399	8.82528	8.84089	7.27183	7.36806	7.27956	-2.92865	-1.55024	2.92865	down	6.11047e-15	2.91474e-13
2052	EPHX1	epoxide hydrolase 1, microsomal (xenobiotic)	7.88286	8.00036	8.02021	9.3818	9.37954	9.35612	2.64758	1.40468	2.64758	up	1.16267e-14	4.84981e-13
80194	TMEM134	transmembrane protein 134	7.99615	8.14831	8.14756	9.21563	9.21145	9.24905	2.18561	1.12804	2.18561	up	5.45176e-13	1.05562e-11
10874	NMU	neuromedin U	7.45385	7.41133	7.56351	5.78071	5.64008	5.62721	-3.4667	-1.79356	3.4667	down	2.52052e-13	5.71599e-12
28969	BZW2	basic leucine zipper and W2 domains 2	9.48078	9.53411	9.47157	7.97108	8.12007	8.1174	-2.68695	-1.42597	2.68695	down	2.25495e-14	8.1565e-13
79677	SMC6	structural maintenance of chromosomes 6	7.27535	7.24674	7.25754	5.37624	5.50401	5.5541	-3.43845	-1.78176	3.43845	down	2.16517e-13	5.07147e-12
130535	KCTD18	potassium channel tetramerization domain containing 18	8.04539	7.97208	7.89261	6.96812	6.92773	6.98708	-2.01259	-1.00905	2.01259	down	1.54171e-11	1.6699e-10
5902	RANBP1	RAN binding protein 1	11.8172	11.8159	11.8153	10.7124	10.7432	10.7822	-2.09967	-1.07016	2.09967	down	1.40568e-15	9.35768e-14
4128	MAOA	monoamine oxidase A	7.48277	7.63037	7.62748	6.4814	6.56014	6.42204	-2.13221	-1.09235	2.13221	down	4.74117e-11	4.34552e-10
7637	ZNF84	zinc finger protein 84	6.13293	6.03653	6.24545	7.16191	7.13224	7.19298	2.03365	1.02407	2.03365	up	2.65955e-10	1.94445e-09
219854	TMEM218	transmembrane protein 218	7.28728	7.371	7.39552	6.14681	6.38433	6.24861	-2.13073	-1.09135	2.13073	down	1.96949e-10	1.49764e-09
91442	FAAP24	Fanconi anemia core complex associated protein 24	6.05625	6.37806	6.40461	5.1458	5.14287	5.30127	-2.11843	-1.08299	2.11843	down	2.10731e-08	9.24038e-08
58488	PCTP	phosphatidylcholine transfer protein	7.35945	7.38233	7.48114	8.44173	8.38889	8.39911	2.00315	1.00227	2.00315	up	3.45334e-12	4.81185e-11
55379	LRRC59	leucine rich repeat containing 59	11.3567	11.3914	11.3128	9.95369	10.0225	10.1374	-2.48941	-1.3158	2.48941	down	2.78494e-14	9.6797e-13
81628	TSC22D4	TSC22 domain family member 4	7.17574	7.10119	7.07657	8.30835	8.27409	8.2895	2.25451	1.17281	2.25451	up	3.61445e-13	7.65111e-12
4084	MXD1	MAX dimerization protein 1	6.42127	6.25494	6.36224	7.88032	7.90209	7.78874	2.84988	1.5109	2.84988	up	4.42773e-13	8.94904e-12
112849	L3HYPDH	L-3-hydroxyproline dehydratase (trans-)	9.25065	9.27852	9.25263	8.18384	8.18598	8.2288	-2.08646	-1.06106	2.08646	down	4.27967e-14	1.35875e-12
339745	SPOPL	speckle type POZ protein like	6.23169	5.98716	6.08601	7.08076	7.09264	7.14909	2.00816	1.00588	2.00816	up	7.4582e-10	4.79404e-09
151246	SGOL2	shugoshin-like 2 (S. pombe)	8.55664	8.67491	8.53411	5.98521	6.49278	6.41599	-4.89246	-2.29056	4.89246	down	2.67323e-12	3.85655e-11
9935	MAFB	v-maf avian musculoaponeurotic fibrosarcoma oncogene homolog B	8.32091	8.32738	8.28026	9.72584	9.76653	9.732	2.69809	1.43194	2.69809	up	4.79681e-16	4.06227e-14
357	SHROOM2	shroom family member 2	7.50866	7.54276	7.56486	5.72567	5.94504	6.19982	-2.99367	-1.58192	2.99367	down	1.15093e-10	9.35099e-10
3098	HK1	hexokinase 1	10.2842	10.3001	10.322	9.08411	9.06338	9.11061	-2.32311	-1.21606	2.32311	down	1.15377e-15	8.00696e-14
84154	RPF2	ribosome production factor 2 homolog	5.7643	5.80106	5.87135	4.48101	4.22451	4.4935	-2.6621	-1.41256	2.6621	down	3.53013e-10	2.48816e-09
8942	KYNU	kynureninase	4.13377	4.13502	4.40424	6.98032	6.95463	6.98564	6.72338	2.74919	6.72338	up	2.35634e-14	8.45308e-13
125488	TTC39C	tetratricopeptide repeat domain 39C	7.92716	7.93424	8.00902	6.81947	6.95997	6.96929	-2.05703	-1.04056	2.05703	down	1.97665e-11	2.05637e-10
123283	TARSL2	threonyl-tRNA synthetase-like 2	6.62198	6.59301	6.7932	7.80481	7.79957	7.70361	2.14345	1.09993	2.14345	up	5.10356e-11	4.63755e-10
2181	ACSL3	acyl-CoA synthetase long-chain family member 3	9.29771	9.2651	9.16208	7.29483	7.34089	7.25301	-3.85141	-1.94539	3.85141	down	4.58394e-16	3.94159e-14
253558	LCLAT1	lysocardiolipin acyltransferase 1	5.74225	5.59112	5.81601	4.51194	4.62889	4.79321	-2.10203	-1.07178	2.10203	down	1.85461e-08	8.24949e-08
54800	KLHL24	kelch like family member 24	6.1437	6.04585	6.22144	7.53815	7.58312	7.5492	2.67553	1.41983	2.67553	up	1.17834e-12	1.99064e-11
3149	HMGB3	high mobility group box 3	7.67724	7.64092	7.80886	5.81117	5.65243	5.87956	-3.80515	-1.92795	3.80515	down	2.17892e-13	5.08846e-12
51124	IER3IP1	immediate early response 3 interacting protein 1	9.22241	9.26018	9.20303	10.6416	10.6202	10.6676	2.66582	1.41458	2.66582	up	1.54375e-16	1.71475e-14
55716	LMBR1L	limb development membrane protein 1-like	6.7893	6.8667	6.94224	7.86028	8.00155	7.93587	2.09433	1.06649	2.09433	up	2.31297e-11	2.35013e-10
79962	DNAJC22	DnaJ heat shock protein family (Hsp40) member C22	6.99889	7.12795	7.16363	5.65381	5.85899	5.84624	-2.48023	-1.31048	2.48023	down	5.97642e-11	5.30771e-10
53344	CHIC1	cysteine rich hydrophobic domain 1	5.27438	5.5429	5.60802	6.79022	6.52674	6.8514	2.3746	1.24769	2.3746	up	6.54696e-09	3.26101e-08
29883	CNOT7	CCR4-NOT transcription complex subunit 7	10.5962	10.7094	10.5909	8.61218	8.50128	8.49305	-4.27709	-2.09663	4.27709	down	6.46542e-17	9.02167e-15
93594	TBC1D31	TBC1 domain family member 31	6.94164	6.87741	6.94245	5.92776	5.99017	5.80894	-2.01607	-1.01154	2.01607	down	4.03073e-10	2.79281e-09
378938	MALAT1	metastasis associated lung adenocarcinoma transcript 1 (non-protein coding)	7.04114	7.02317	7.19629	8.23202	8.33042	8.26948	2.28222	1.19044	2.28222	up	3.57075e-12	4.95257e-11
834	CASP1	caspase 1	5.2044	5.15404	5.18915	4.28132	4.0713	3.90839	-2.13691	-1.09553	2.13691	down	2.80517e-08	1.19698e-07
100653049	LOC100653049	keratin, type I cuticular Ha4	6.8894	6.80959	6.85715	5.79004	5.56896	5.95528	-2.11494	-1.08062	2.11494	down	6.03478e-09	3.03714e-08
643752	RAP1BL	RAP1B, member of RAS oncogene family pseudogene	9.24706	9.35903	8.961	7.57781	7.43529	7.28201	-3.38071	-1.75733	3.38071	down	1.5859e-11	1.70974e-10
29128	UHRF1	ubiquitin-like with PHD and ring finger domains 1	8.66701	8.67721	8.7588	6.05093	6.09135	5.9762	-6.32696	-2.66151	6.32696	down	3.70691e-17	5.88453e-15
4256	MGP	matrix Gla protein	4.13983	4.148	4.23881	5.18661	5.25216	5.19673	2.05094	1.03629	2.05094	up	4.34791e-09	2.27309e-08
79083	MLPH	melanophilin	6.43235	6.4332	6.41012	5.22769	5.31249	5.39311	-2.16464	-1.11413	2.16464	down	2.91876e-10	2.10608e-09
11261	CHP1	calcineurin-like EF-hand protein 1	7.70115	7.6217	7.67646	6.59066	6.6148	6.54816	-2.11682	-1.0819	2.11682	down	5.5218e-12	7.07216e-11
55970	GNG12	guanine nucleotide binding protein (G protein), gamma 12	9.4877	9.52431	9.48285	7.68565	7.82692	7.84482	-3.27726	-1.71249	3.27726	down	2.10829e-15	1.29166e-13
8458	TTF2	transcription termination factor, RNA polymerase II	8.31914	8.2061	8.05679	6.00178	6.21589	5.93553	-4.41662	-2.14294	4.41662	down	2.4959e-13	5.67e-12
7473	WNT3	wingless-type MMTV integration site family member 3	7.27279	7.3162	7.36531	5.94087	5.99838	5.96346	-2.55006	-1.35053	2.55006	down	1.38877e-12	2.26418e-11
51315	KRCC1	lysine-rich coiled-coil 1	5.51946	5.43952	5.24852	4.3008	4.35768	4.41992	-2.06056	-1.04303	2.06056	down	1.66941e-08	7.51618e-08
219844	HYLS1	hydrolethalus syndrome 1	7.74319	7.69141	7.67673	6.71902	6.68382	6.56795	-2.06601	-1.04685	2.06601	down	2.31658e-11	2.35319e-10
8894	EIF2S2	eukaryotic translation initiation factor 2 subunit beta	7.71498	7.50959	7.57458	5.90889	5.65925	5.88353	-3.4402	-1.78249	3.4402	down	1.93895e-12	2.97094e-11
135398	C6orf141	chromosome 6 open reading frame 141	5.45807	5.32312	5.57634	6.58973	6.72989	6.44226	2.19586	1.13478	2.19586	up	4.03429e-09	2.12558e-08
3092	HIP1	huntingtin interacting protein 1	8.45209	8.22822	8.40015	6.7352	6.85974	6.78659	-2.96146	-1.56631	2.96146	down	4.11973e-13	8.48843e-12
81930	KIF18A	kinesin family member 18A	8.9617	8.94637	8.9241	6.96014	7.15406	6.97831	-3.76649	-1.91322	3.76649	down	3.97022e-15	2.05644e-13
374393	FAM111B	family with sequence similarity 111 member B	7.13359	7.09684	6.9998	3.69252	3.73272	3.57725	-10.6239	-3.40925	10.6239	down	4.91496e-16	4.11785e-14
79161	TMEM243	transmembrane protein 243	8.24694	8.20782	8.10368	6.39832	6.45135	6.54846	-3.2946	-1.7201	3.2946	down	5.25721e-14	1.60792e-12
84904	ARHGEF39	Rho guanine nucleotide exchange factor 39	4.51841	4.61645	4.64126	3.6628	3.57828	3.29452	-2.11429	-1.08017	2.11429	down	7.01848e-08	2.74103e-07
389421	LIN28B	lin-28 homolog B (C. elegans)	4.81328	4.53273	4.75375	6.23134	6.13411	6.21736	2.81737	1.49435	2.81737	up	9.61655e-11	7.98697e-10
84333	PCGF5	polycomb group ring finger 5	7.13986	7.17264	7.05227	5.79098	5.6658	5.72276	-2.63003	-1.39508	2.63003	down	4.212e-12	5.66965e-11
10482	NXF1	nuclear RNA export factor 1	9.6178	9.66111	9.79853	10.7131	10.7246	10.7465	2.04998	1.03561	2.04998	up	5.90145e-13	1.12547e-11
10211	FLOT1	flotillin 1	10.2572	10.1743	10.2541	7.30974	7.26202	7.32121	-7.62574	-2.93088	7.62574	down	1.57699e-19	2.27954e-16
144195	SLC2A14	solute carrier family 2 (facilitated glucose transporter), member 14	6.8388	6.89087	6.99288	7.99842	7.97079	8.08742	2.16049	1.11136	2.16049	up	9.35866e-12	1.09866e-10
90550	MCU	mitochondrial calcium uniporter	7.19465	7.13142	7.05211	5.90103	5.83594	5.78395	-2.43809	-1.28575	2.43809	down	1.19705e-11	1.35107e-10
11221	DUSP10	dual specificity phosphatase 10	8.22361	8.18483	8.36746	7.3185	7.23888	7.21285	-2.00262	-1.00189	2.00262	down	3.59392e-11	3.40875e-10
10556	RPP30	ribonuclease P/MRP 30kDa subunit	5.86549	5.99475	5.87942	4.30757	4.31844	4.10501	-3.18115	-1.66955	3.18115	down	2.37566e-11	2.39952e-10
4939	OAS2	2'-5'-oligoadenylate synthetase 2	7.18158	7.10493	7.06987	4.92368	4.95164	4.88795	-4.58748	-2.1977	4.58748	down	1.67554e-14	6.41583e-13
133686	NADK2	NAD kinase 2, mitochondrial	5.80871	5.68511	5.5582	7.50094	7.56979	7.4485	3.5367	1.8224	3.5367	up	4.72894e-13	9.41705e-12
81624	DIAPH3	diaphanous related formin 3	8.29862	8.44925	8.40487	6.22229	6.15375	6.34913	-4.41534	-2.14252	4.41534	down	7.10654e-15	3.27821e-13
100507436	MICA	MHC class I polypeptide-related sequence A	9.13396	9.27549	9.2831	10.3304	10.3479	10.3937	2.18327	1.12649	2.18327	up	1.65156e-13	4.05965e-12
89796	NAV1	neuron navigator 1	7.83688	7.99631	7.83626	5.36414	5.52975	5.76291	-5.05444	-2.33755	5.05444	down	3.42321e-13	7.31864e-12
10036	CHAF1A	chromatin assembly factor 1 subunit A	8.16096	8.20654	8.23603	6.18234	6.04233	6.18518	-4.18306	-2.06456	4.18306	down	3.2705e-15	1.79602e-13
84918	LRP11	LDL receptor related protein 11	10.1764	10.2217	10.1302	8.30926	8.41719	8.45548	-3.43931	-1.78212	3.43931	down	5.02864e-16	4.18626e-14
54587	MXRA8	matrix-remodelling associated 8	6.63773	6.68458	6.7518	8.85096	8.81338	8.76586	4.34301	2.1187	4.34301	up	2.3576e-16	2.36572e-14
100528020	FAM187A	family with sequence similarity 187 member A	5.84878	5.67825	5.78667	6.84348	6.73835	6.88052	2.06988	1.04955	2.06988	up	5.1686e-10	3.46666e-09
4693	NDP	Norrie disease (pseudoglioma)	9.18516	9.15667	9.22433	8.06687	8.01315	8.07619	-2.1987	-1.13665	2.1987	down	4.66909e-14	1.45876e-12
2651	GCNT2	glucosaminyl (N-acetyl) transferase 2, I-branching enzyme (I blood group)	5.88012	5.9144	6.05944	7.56323	7.59391	7.67992	3.16243	1.66103	3.16243	up	3.87858e-13	8.09961e-12
5791	PTPRE	protein tyrosine phosphatase, receptor type, E	5.49643	5.3881	5.75212	6.58861	6.78554	6.75583	2.24147	1.16444	2.24147	up	5.3562e-09	2.73566e-08
5888	RAD51	RAD51 recombinase	8.00583	8.02838	7.7003	6.24816	6.33009	6.36094	-3.02816	-1.59844	3.02816	down	1.00897e-11	1.16977e-10
9778	KIAA0232	KIAA0232	7.77972	7.86424	7.89882	8.93734	8.89306	8.963	2.11923	1.08354	2.11923	up	4.58718e-13	9.20016e-12
79892	MCMBP	minichromosome maintenance complex binding protein	9.70058	9.53846	9.66161	8.32701	8.22024	8.28331	-2.56098	-1.3567	2.56098	down	6.29465e-14	1.85369e-12
115294	PCMTD1	protein-L-isoaspartate (D-aspartate) O-methyltransferase domain containing 1	8.42687	8.44028	8.38544	9.48052	9.39812	9.41194	2.01763	1.01266	2.01763	up	1.54896e-13	3.8464e-12
220134	SKA1	spindle and kinetochore associated complex subunit 1	8.35054	8.38239	8.44219	4.84022	5.05555	4.96149	-10.8475	-3.43929	10.8475	down	3.4502e-17	5.64291e-15
868	CBLB	Cbl proto-oncogene B, E3 ubiquitin protein ligase	8.07162	7.91521	8.1108	9.11403	8.9941	9.07364	2.03926	1.02805	2.03926	up	1.42181e-11	1.56117e-10
10254	STAM2	signal transducing adaptor molecule 2	7.45545	7.45512	7.21305	5.61086	5.54774	5.4845	-3.54759	-1.82684	3.54759	down	1.02375e-12	1.77414e-11
6464	SHC1	SHC (Src homology 2 domain containing) transforming protein 1	9.08742	9.12938	9.03229	10.139	10.1873	10.2287	2.14646	1.10196	2.14646	up	4.33244e-14	1.37217e-12
58489	ABHD17C	abhydrolase domain containing 17C	7.77941	7.68153	7.68601	6.51945	6.42127	6.32778	-2.45006	-1.29282	2.45006	down	5.07364e-12	6.58617e-11
51176	LEF1	lymphoid enhancer-binding factor 1	5.25624	5.16793	5.46387	4.12292	4.35409	4.0461	-2.17595	-1.12164	2.17595	down	4.32128e-08	1.76884e-07
56674	TMEM9B	TMEM9 domain family member B	9.22449	9.19361	9.19128	7.60391	7.60245	7.62109	-3.0188	-1.59398	3.0188	down	3.08011e-16	2.88926e-14
202151	RANBP3L	RAN binding protein 3-like	4.71631	5.06062	5.29499	7.56103	7.58546	7.66525	5.97915	2.57994	5.97915	up	2.08016e-12	3.14429e-11
80306	MED28	mediator complex subunit 28	7.58327	7.48614	7.53246	9.1241	9.097	9.12663	2.99375	1.58195	2.99375	up	1.21776e-15	8.31852e-14
7357	UGCG	UDP-glucose ceramide glucosyltransferase	9.2035	9.23639	9.27368	7.99816	8.03444	8.03736	-2.32066	-1.21454	2.32066	down	1.37836e-14	5.53746e-13
166785	MMAA	methylmalonic aciduria (cobalamin deficiency) cblA type	4.69899	4.94383	5.0494	6.30555	6.21877	6.21128	2.54523	1.34779	2.54523	up	7.4006e-10	4.75836e-09
57574	MARCH4	membrane associated ring-CH-type finger 4	7.19963	7.31215	7.25108	5.52434	5.9325	5.54888	-3.00156	-1.58571	3.00156	down	1.37317e-10	1.09235e-09
9732	DOCK4	dedicator of cytokinesis 4	5.45151	5.20248	5.23569	6.48477	6.52293	6.62727	2.37583	1.24843	2.37583	up	4.2116e-10	2.90223e-09
4288	MKI67	marker of proliferation Ki-67	7.53556	7.40403	7.49952	4.26014	4.78611	4.36844	-8.04527	-3.00814	8.04527	down	2.67466e-13	5.9962e-12
163071	ZNF114	zinc finger protein 114	4.55764	4.61971	4.66893	7.46585	7.37374	7.43766	7.01442	2.81032	7.01442	up	7.24934e-16	5.53865e-14
63935	PCIF1	PDX1 C-terminal inhibiting factor 1	6.58691	6.61142	6.88643	4.79355	4.57242	4.4508	-4.2555	-2.08933	4.2555	down	1.13258e-11	1.29132e-10
5997	RGS2	regulator of G-protein signaling 2	7.72009	7.58941	7.64652	10.0005	9.96809	10.0243	5.08286	2.34564	5.08286	up	7.00201e-18	1.89344e-15
151648	SGOL1	shugoshin-like 1 (S. pombe)	6.62942	6.68995	6.69071	4.31553	4.36225	4.41168	-4.9481	-2.30687	4.9481	down	2.74759e-14	9.56775e-13
728715	LOC728715	ovostatin homolog 2	6.02499	6.34957	6.10637	3.91104	3.9492	3.94497	-4.67589	-2.22524	4.67589	down	1.23642e-12	2.07107e-11
55333	SYNJ2BP	synaptojanin 2 binding protein	9.23448	9.24444	9.26112	7.56203	7.51786	7.47248	-3.31549	-1.72922	3.31549	down	2.62923e-16	2.55179e-14
140876	FAM65C	family with sequence similarity 65 member C	4.37311	4.05522	4.36403	6.01381	6.14664	6.18766	3.60979	1.85192	3.60979	up	2.93733e-11	2.87518e-10
90427	BMF	Bcl2 modifying factor	4.80183	4.47037	4.70101	6.70556	6.68433	6.64608	4.05843	2.02092	4.05843	up	2.07221e-12	3.1347e-11
101929777	LOC101929777	uncharacterized LOC101929777	7.27279	7.3162	7.36531	5.94087	5.99838	5.96346	-2.55006	-1.35053	2.55006	down	1.38877e-12	2.26418e-11
10979	FERMT2	fermitin family member 2	8.90399	8.85038	8.96776	7.5977	7.59144	7.65864	-2.44774	-1.29145	2.44774	down	5.28141e-14	1.6135e-12
79686	LINC00341	long intergenic non-protein coding RNA 341	7.85915	7.80719	7.88985	5.91349	5.93904	5.79971	-3.91221	-1.96798	3.91221	down	1.15333e-14	4.82626e-13
121441	NEDD1	neural precursor cell expressed, developmentally down-regulated 1	7.55144	7.44358	7.46798	6.32774	6.30873	6.37424	-2.22031	-1.15076	2.22031	down	6.83715e-12	8.44894e-11
7371	UCK2	uridine-cytidine kinase 2	9.64953	9.67356	9.68024	7.15614	7.21636	7.34154	-5.38805	-2.42976	5.38805	down	3.60332e-17	5.79042e-15
5255	PHKA1	phosphorylase kinase, alpha 1 (muscle)	6.35401	6.2968	6.2968	5.05578	5.22078	5.23109	-2.214	-1.14665	2.214	down	4.2763e-10	2.9401e-09
90990	KIFC2	kinesin family member C2	6.18747	5.94256	6.0945	7.06051	7.09454	7.2744	2.09697	1.06831	2.09697	up	1.54795e-09	9.13395e-09
727957	MROH1	maestro heat-like repeat family member 1	6.11744	6.10251	6.06286	7.34757	7.32539	7.31925	2.35621	1.23647	2.35621	up	2.30414e-12	3.42217e-11
7398	USP1	ubiquitin specific peptidase 1	9.11818	9.16758	9.14714	6.89196	6.83481	6.90794	-4.81009	-2.26606	4.81009	down	1.63723e-17	3.27529e-15
54502	RBM47	RNA binding motif protein 47	7.02461	6.81101	6.78082	5.46533	5.478	5.63282	-2.54341	-1.34676	2.54341	down	1.26306e-10	1.01485e-09
83695	RHNO1	RAD9-HUS1-RAD1 interacting nuclear orphan 1	8.23603	8.28177	8.38431	5.95417	6.07416	6.06469	-4.82222	-2.2697	4.82222	down	1.46924e-15	9.63357e-14
84851	TRIM52	tripartite motif containing 52	4.02133	4.14021	4.25372	5.31494	5.29933	5.14821	2.16706	1.11574	2.16706	up	8.07691e-09	3.9263e-08
203	AK1	adenylate kinase 1	7.69872	7.66796	7.75245	8.69539	8.66169	8.76246	2.00019	1.00014	2.00019	up	1.54688e-12	2.47298e-11
23586	DDX58	DEAD (Asp-Glu-Ala-Asp) box polypeptide 58	6.94959	7.00276	7.17071	8.02903	8.06987	8.02991	2.00266	1.00192	2.00266	up	7.50694e-11	6.45074e-10
8926	SNURF	SNRPN upstream reading frame	8.96725	8.98856	9.09389	10.2318	10.2587	10.3507	2.40129	1.26381	2.40129	up	4.65212e-14	1.45578e-12
8309	ACOX2	acyl-CoA oxidase 2, branched chain	8.25688	8.31577	8.39213	6.26059	6.29699	6.38708	-4.01864	-2.00671	4.01864	down	3.91512e-15	2.0343e-13
9837	GINS1	GINS complex subunit 1 (Psf1 homolog)	8.30718	8.2953	8.3089	6.15018	6.01136	6.07299	-4.67711	-2.22562	4.67711	down	5.15161e-16	4.25252e-14
54677	CROT	carnitine O-octanoyltransferase	7.03731	7.12693	7.11536	8.07612	8.10233	8.13002	2.01339	1.00962	2.01339	up	3.71955e-12	5.12631e-11
10212	DDX39A	DEAD (Asp-Glu-Ala-Asp) box polypeptide 39A	10.8564	10.9214	10.8842	9.68713	9.73823	9.68321	-2.27281	-1.18448	2.27281	down	1.72402e-15	1.09207e-13
56271	BEX4	brain expressed X-linked 4	7.47678	7.47121	7.58591	8.81936	8.80822	8.7945	2.45557	1.29606	2.45557	up	5.16154e-14	1.58732e-12
100526664	LY75-CD302	LY75-CD302 readthrough	8.15331	8.09207	8.18985	5.67029	5.92223	5.86089	-5.01856	-2.32727	5.01856	down	8.6627e-15	3.8534e-13
3482	IGF2R	insulin like growth factor 2 receptor	8.21687	8.2386	8.36327	9.46649	9.44094	9.42625	2.25269	1.17165	2.25269	up	1.45311e-13	3.66408e-12
9735	KNTC1	kinetochore associated 1	8.26809	8.34444	8.29767	7.07879	7.16762	7.10392	-2.27619	-1.18662	2.27619	down	3.75885e-13	7.90689e-12
4013	VWA5A	von Willebrand factor A domain containing 5A	4.37129	4.1912	4.44235	6.14683	6.36107	6.29752	3.81988	1.93353	3.81988	up	5.77645e-12	7.33198e-11
28663	TRAV20	T cell receptor alpha variable 20	5.16475	5.21057	5.34486	4.13679	4.06503	3.20142	-2.71129	-1.43898	2.71129	down	2.08887e-06	6.14483e-06
23397	NCAPH	non-SMC condensin I complex subunit H	8.89305	8.91932	8.90415	5.91121	5.51559	5.53602	-9.52179	-3.25123	9.52179	down	2.43084e-15	1.43761e-13
9581	PREPL	prolyl endopeptidase-like	6.95271	6.99729	7.08848	8.29729	8.32663	8.36165	2.48923	1.3157	2.48923	up	2.13836e-13	5.02067e-12
4171	MCM2	minichromosome maintenance complex component 2	8.33401	8.33278	8.34168	6.42102	6.45843	6.4822	-3.68656	-1.88227	3.68656	down	8.27074e-16	6.17706e-14
102724562	LOC102724562	hepatocyte growth factor-like protein	5.27993	5.49952	5.30424	6.41531	6.64191	6.68301	2.32761	1.21885	2.32761	up	1.54598e-09	9.12508e-09
387893	KMT5A	lysine (K)-specific methyltransferase 5A	7.24979	7.26981	7.21737	5.43404	5.42313	5.61342	-3.37634	-1.75546	3.37634	down	4.56105e-13	9.16181e-12
55437	STRADB	STE20-related kinase adaptor beta	7.0891	7.13651	7.00205	5.98192	6.05607	6.13099	-2.0273	-1.01956	2.0273	down	2.64047e-10	1.93375e-09
8793	TNFRSF10D	tumor necrosis factor receptor superfamily member 10d, decoy with truncated death domain	8.03036	8.01647	8.04379	10.2683	10.2732	10.2441	4.69666	2.23164	4.69666	up	5.92158e-19	4.04794e-16
444	ASPH	aspartate beta-hydroxylase	8.80058	8.82553	8.57106	7.268	7.25452	7.24585	-2.78228	-1.47627	2.78228	down	7.5067e-13	1.37156e-11
83464	APH1B	aph-1 homolog B, gamma secretase subunit	6.86223	6.92085	6.92282	8.23251	8.20385	8.22856	2.4961	1.31967	2.4961	up	6.63629e-14	1.93177e-12
54529	ASNSD1	asparagine synthetase domain containing 1	9.73764	9.71847	9.7752	8.33036	8.35972	8.31083	-2.65762	-1.41013	2.65762	down	6.95279e-16	5.37026e-14
55584	CHRNA9	cholinergic receptor, nicotinic alpha 9	6.95244	6.96337	7.05686	8.29331	8.35255	8.24489	2.4726	1.30603	2.4726	up	2.80951e-13	6.23524e-12
7126	TNFAIP1	TNF alpha induced protein 1	8.12277	8.07926	8.17094	9.18579	9.16613	9.208	2.08828	1.06232	2.08828	up	1.20535e-13	3.15498e-12
624	BDKRB2	bradykinin receptor B2	3.81498	3.64632	3.92886	5.32349	5.41505	5.61893	3.15091	1.65577	3.15091	up	2.42812e-10	1.79703e-09
27097	TAF5L	TATA-box binding protein associated factor 5 like	7.05088	7.11148	7.12421	6.0083	6.00456	6.08104	-2.09104	-1.06422	2.09104	down	4.45957e-11	4.12405e-10
57095	PITHD1	PITH (C-terminal proteasome-interacting domain of thioredoxin-like) domain containing 1	9.48045	9.57366	9.4537	8.19911	8.32688	8.28216	-2.35091	-1.23322	2.35091	down	1.26302e-13	3.27315e-12
10957	PNRC1	proline rich nuclear receptor coactivator 1	6.97472	7.04979	7.15367	8.92137	8.94448	8.85545	3.59928	1.84771	3.59928	up	4.15207e-15	2.13372e-13
142	PARP1	poly(ADP-ribose) polymerase 1	9.84031	9.8269	9.79486	6.97737	6.97737	6.97051	-7.18808	-2.84561	7.18808	down	1.33497e-19	2.27954e-16
85012	TCEAL3	transcription elongation factor A (SII)-like 3	10.6573	10.6781	10.6424	9.59584	9.57739	9.62187	-2.08622	-1.06089	2.08622	down	3.56848e-15	1.90368e-13
3484	IGFBP1	insulin like growth factor binding protein 1	8.05585	7.9389	7.75129	6.83305	6.8065	6.81479	-2.13944	-1.09723	2.13944	down	1.76412e-10	1.36351e-09
9590	AKAP12	A-kinase anchoring protein 12	8.23749	8.12431	8.25633	5.61783	5.5475	5.82072	-5.83215	-2.54403	5.83215	down	6.36833e-15	3.00508e-13
55251	PCMTD2	protein-L-isoaspartate (D-aspartate) O-methyltransferase domain containing 2	7.80326	7.72844	7.79612	9.05179	9.08357	9.09227	2.46218	1.29994	2.46218	up	1.08939e-14	4.62282e-13
219790	RTKN2	rhotekin 2	5.94407	5.50251	5.88735	4.36952	4.31991	4.08512	-2.8675	-1.51979	2.8675	down	4.19777e-09	2.20252e-08
4601	MXI1	MAX interactor 1, dimerization protein	4.91973	5.00384	5.26177	7.36841	7.4446	7.38849	5.05854	2.33872	5.05854	up	1.66703e-13	4.08283e-12
716	C1S	complement component 1, s subcomponent	7.09662	7.04877	7.09845	8.39762	8.37634	8.43669	2.50059	1.32227	2.50059	up	4.18985e-14	1.33564e-12
10112	KIF20A	kinesin family member 20A	9.67383	9.73264	9.64215	6.70267	6.62162	6.60106	-8.23113	-3.04109	8.23113	down	6.76061e-19	4.19308e-16
23456	ABCB10	ATP binding cassette subfamily B member 10	7.50297	7.3364	7.33763	6.5394	6.2729	6.32105	-2.02027	-1.01455	2.02027	down	2.11583e-09	1.20409e-08
220001	VWCE	von Willebrand factor C and EGF domains	5.45004	5.14346	5.1445	6.72159	6.78637	6.82511	2.89124	1.53169	2.89124	up	6.76822e-11	5.89918e-10
64130	LIN7B	lin-7 homolog B (C. elegans)	5.73825	5.87667	5.97502	6.84997	6.90151	7.04477	2.09764	1.06877	2.09764	up	1.39327e-09	8.3295e-09
9448	MAP4K4	mitogen-activated protein kinase kinase kinase kinase 4	8.20535	8.21538	8.38079	9.60825	9.5995	9.61766	2.53379	1.3413	2.53379	up	6.85995e-14	1.98508e-12
23767	FLRT3	fibronectin leucine rich transmembrane protein 3	5.053	4.77538	5.01965	6.43695	6.43695	6.44416	2.80891	1.49001	2.80891	up	5.82757e-11	5.19671e-10
55163	PNPO	pyridoxamine 5'-phosphate oxidase	9.12206	9.08393	9.18646	7.55404	7.65776	7.60252	-2.87995	-1.52604	2.87995	down	5.6627e-15	2.74968e-13
4609	MYC	v-myc avian myelocytomatosis viral oncogene homolog	9.02291	8.91992	8.98735	6.61539	6.44337	6.47882	-5.51821	-2.4642	5.51821	down	1.64319e-16	1.80475e-14
1266	CNN3	calponin 3, acidic	9.49353	9.35977	9.38361	6.66676	6.88683	6.90517	-6.03234	-2.59272	6.03234	down	6.00383e-16	4.77791e-14
1894	ECT2	epithelial cell transforming 2	7.886	7.93036	8.00645	6.40188	6.48269	6.50878	-2.7827	-1.47649	2.7827	down	1.97612e-13	4.69699e-12
723790	HIST2H2AA4	histone cluster 2, H2aa4	10.7241	10.7001	10.8071	12.0063	11.9553	11.987	2.36056	1.23913	2.36056	up	1.56016e-15	1.01449e-13
9682	KDM4A	lysine (K)-specific demethylase 4A	7.00969	7.05858	7.12848	8.04069	8.1962	8.05843	2.04607	1.03286	2.04607	up	2.38514e-11	2.40613e-10
79003	MIS12	MIS12 kinetochore complex component	7.15687	7.22517	7.18719	6.1506	6.1437	6.0079	-2.12728	-1.08901	2.12728	down	5.8813e-11	5.23723e-10
23426	GRIP1	glutamate receptor interacting protein 1	6.06186	5.85074	5.7389	7.05703	7.01275	7.03193	2.21925	1.15007	2.21925	up	6.87381e-10	4.45491e-09
4354	MPP1	membrane protein, palmitoylated 1	8.36031	8.54897	8.38553	7.14557	7.17188	7.13821	-2.42791	-1.27972	2.42791	down	9.32724e-13	1.64739e-11
55156	ARMC1	armadillo repeat containing 1	8.72457	8.84404	8.77864	7.61696	7.69025	7.82136	-2.10365	-1.07289	2.10365	down	1.12364e-11	1.28519e-10
135293	PM20D2	peptidase M20 domain containing 2	5.18744	5.2044	5.14488	3.98846	3.97403	4.31747	-2.12224	-1.08559	2.12224	down	3.80511e-08	1.57696e-07
7298	TYMS	thymidylate synthetase	10.8225	10.9388	10.7279	8.55585	8.69167	8.65413	-4.58156	-2.19584	4.58156	down	3.40973e-16	3.08607e-14
57650	KIAA1524	KIAA1524	8.43116	8.28016	8.42449	6.07759	6.0146	6.25768	-4.79649	-2.26198	4.79649	down	1.34819e-14	5.44976e-13
23092	ARHGAP26	Rho GTPase activating protein 26	5.64009	5.41529	5.59308	3.63244	3.87975	4.0062	-3.27166	-1.71002	3.27166	down	2.3413e-10	1.74198e-09
9700	ESPL1	extra spindle pole bodies like 1, separase	8.48785	8.41871	8.40685	6.86669	6.84294	6.84305	-3.00405	-1.58691	3.00405	down	5.54905e-15	2.71973e-13
222235	FBXL13	F-box and leucine-rich repeat protein 13	7.24878	7.20421	7.19554	6.09331	6.15102	6.041	-2.17508	-1.12107	2.17508	down	1.87037e-11	1.96509e-10
11186	RASSF1	Ras association (RalGDS/AF-6) domain family member 1	8.07916	8.14105	8.23584	6.92201	7.01122	7.05639	-2.22758	-1.15548	2.22758	down	5.65474e-12	7.20579e-11
25782	RAB3GAP2	RAB3 GTPase activating non-catalytic protein subunit 2	10.0363	9.8864	9.89929	7.7629	7.82065	7.78269	-4.44422	-2.15193	4.44422	down	6.31744e-17	8.91032e-15
79572	ATP13A3	ATPase type 13A3	10.0355	9.92561	9.72183	8.48127	8.29479	8.18838	-2.97491	-1.57285	2.97491	down	9.47431e-12	1.11124e-10
28738	TRAJ17	T cell receptor alpha joining 17	5.16475	5.21057	5.34486	4.13679	4.06503	3.20142	-2.71129	-1.43898	2.71129	down	2.08887e-06	6.14483e-06
2237	FEN1	flap structure-specific endonuclease 1	10.4796	10.3362	10.2892	8.5442	8.54304	8.51839	-3.56313	-1.83314	3.56313	down	6.85891e-16	5.33607e-14
55687	TRMU	tRNA 5-methylaminomethyl-2-thiouridylate methyltransferase	8.44991	8.53881	8.47872	5.89656	6.31424	6.25274	-5.04423	-2.33463	5.04423	down	2.63627e-13	5.93388e-12
9928	KIF14	kinesin family member 14	8.2104	8.36112	8.15577	5.45553	5.59456	5.44412	-6.70092	-2.74436	6.70092	down	9.5413e-16	6.91944e-14
4781	NFIB	nuclear factor I/B	7.36243	7.15764	7.39916	5.78597	5.99737	5.97061	-2.61793	-1.38843	2.61793	down	6.29566e-11	5.54227e-10
3866	KRT15	keratin 15, type I	6.68479	6.57671	6.46396	4.49234	4.78457	4.50861	-3.94488	-1.97998	3.94488	down	6.66496e-12	8.2648e-11
7083	TK1	thymidine kinase 1, soluble	10.2895	10.2746	10.2832	8.25762	8.33838	8.34613	-3.91327	-1.96837	3.91327	down	9.21412e-18	2.30118e-15
259266	ASPM	abnormal spindle microtubule assembly	9.9557	10.0093	9.91331	7.24301	7.30282	7.19211	-6.55894	-2.71346	6.55894	down	1.59705e-18	7.42557e-16
25842	ASF1A	anti-silencing function 1A histone chaperone	9.58537	9.66113	9.49057	8.43857	8.49275	8.3725	-2.21057	-1.14442	2.21057	down	7.72672e-13	1.4033e-11
57609	DIP2B	disco interacting protein 2 homolog B	7.62359	7.72595	7.81502	8.78961	8.86186	8.85081	2.16231	1.11257	2.16231	up	2.5733e-12	3.73978e-11
3978	LIG1	ligase I, DNA, ATP-dependent	7.57627	7.58026	7.67644	6.47981	6.57072	6.72614	-2.02619	-1.01877	2.02619	down	3.29455e-10	2.3436e-09
284992	CCDC150	coiled-coil domain containing 150	5.75898	5.21528	5.58545	4.59917	4.57099	4.32673	-2.02924	-1.02094	2.02924	down	1.14614e-06	3.53826e-06
84959	UBASH3B	ubiquitin associated and SH3 domain containing B	7.35728	7.25368	7.3929	5.34908	5.62074	5.74273	-3.39584	-1.76377	3.39584	down	1.58512e-11	1.70937e-10
5357	PLS1	plastin 1	6.593	6.3995	6.61397	4.91716	4.52217	4.7424	-3.50216	-1.80825	3.50216	down	5.66249e-11	5.06794e-10
890	CCNA2	cyclin A2	9.63178	9.64333	9.66392	6.85733	6.85489	6.8667	-6.90051	-2.7867	6.90051	down	2.27369e-19	2.53969e-16
546	ATRX	alpha thalassemia/mental retardation syndrome X-linked	5.45392	5.45024	5.61216	6.72401	6.43938	6.50803	2.07297	1.0517	2.07297	up	6.03881e-09	3.03839e-08
51164	DCTN4	dynactin subunit 4	7.80617	7.80452	7.71426	5.9899	6.14602	6.21531	-3.15558	-1.65791	3.15558	down	4.86217e-13	9.6243e-12
79915	ATAD5	ATPase family, AAA domain containing 5	5.86458	5.85888	6.0854	4.2948	4.40838	3.96301	-3.2812	-1.71422	3.2812	down	5.14983e-10	3.45584e-09
27303	RBMS3	RNA binding motif, single stranded interacting protein 3	5.35296	5.28675	5.4858	3.87099	4.00519	3.82082	-2.78209	-1.47617	2.78209	down	1.94918e-10	1.48431e-09
5898	RALA	v-ral simian leukemia viral oncogene homolog A (ras related)	9.84826	9.85151	9.78606	8.72188	8.77217	8.77771	-2.10141	-1.07136	2.10141	down	3.04108e-14	1.03778e-12
7832	BTG2	BTG family member 2	3.94472	3.73731	3.65489	7.12672	7.09957	7.04059	9.91757	3.30999	9.91757	up	2.45231e-15	1.44594e-13
64208	POPDC3	popeye domain containing 3	9.32201	9.43139	9.34326	7.52002	7.46848	7.61506	-3.55792	-1.83103	3.55792	down	1.47772e-15	9.67301e-14
28517	TRDV2	T cell receptor delta variable 2	5.16475	5.21057	5.34486	4.13679	4.06503	3.20142	-2.71129	-1.43898	2.71129	down	2.08887e-06	6.14483e-06
10592	SMC2	structural maintenance of chromosomes 2	8.90853	9.082	8.9785	7.48739	7.46721	7.56844	-2.79335	-1.482	2.79335	down	5.57739e-14	1.68491e-12
51435	SCARA3	scavenger receptor class A, member 3	9.21483	8.94084	9.14651	7.87609	7.83016	7.76424	-2.42373	-1.27723	2.42373	down	6.39286e-12	7.99204e-11
51075	TMX2	thioredoxin-related transmembrane protein 2	9.8482	9.9827	9.96967	8.76614	8.85517	8.75896	-2.20396	-1.1401	2.20396	down	2.28814e-13	5.28064e-12
51375	SNX7	sorting nexin 7	9.09714	9.11838	8.89902	7.53852	7.42947	7.32825	-3.04428	-1.6061	3.04428	down	5.57795e-13	1.07687e-11
23327	NEDD4L	neural precursor cell expressed, developmentally down-regulated 4-like, E3 ubiquitin protein ligase	7.80074	7.81631	7.95356	5.9839	5.91766	6.01263	-3.69474	-1.88547	3.69474	down	2.82599e-14	9.77996e-13
8671	SLC4A4	solute carrier family 4 (sodium bicarbonate cotransporter), member 4	7.66997	7.63833	7.58636	5.99525	6.04012	6.0535	-3.03549	-1.60193	3.03549	down	7.43445e-14	2.11235e-12
9937	DCLRE1A	DNA cross-link repair 1A	7.33124	7.36614	7.40621	5.91038	5.87945	5.8394	-2.81172	-1.49145	2.81172	down	3.70957e-13	7.81162e-12
6773	STAT2	signal transducer and activator of transcription 2	6.4762	6.3544	6.4855	7.50446	7.66434	7.6716	2.25756	1.17477	2.25756	up	2.85344e-11	2.80832e-10
100534599	ISY1-RAB43	ISY1-RAB43 readthrough	7.55964	7.5663	7.52145	8.68314	8.70541	8.7588	2.2449	1.16665	2.2449	up	9.03106e-14	2.48671e-12
51111	KMT5B	lysine (K)-specific methyltransferase 5B	7.80951	7.75863	7.87292	8.8313	8.8219	8.83731	2.02298	1.01648	2.02298	up	6.22868e-13	1.17707e-11
1306	COL15A1	collagen, type XV, alpha 1	4.77066	4.8722	4.97247	3.77982	3.59216	3.55921	-2.3425	-1.22805	2.3425	down	4.21444e-09	2.21097e-08
90956	ADCK2	aarF domain containing kinase 2	7.03181	6.96812	7.10367	5.88615	5.76299	5.59504	-2.43931	-1.28647	2.43931	down	1.5522e-10	1.22016e-09
389792	IER5L	immediate early response 5-like	7.91461	7.89196	8.03006	9.25239	9.22719	9.25611	2.46175	1.29969	2.46175	up	3.74874e-14	1.21881e-12
8202	NCOA3	nuclear receptor coactivator 3	7.39205	7.45288	7.23634	8.53016	8.30572	8.38961	2.06777	1.04807	2.06777	up	2.06202e-10	1.55994e-09
59353	TMEM35	transmembrane protein 35	4.70926	4.85028	4.58804	5.74922	5.80536	5.74193	2.07002	1.04964	2.07002	up	6.84179e-09	3.38678e-08
9836	LCMT2	leucine carboxyl methyltransferase 2	7.99454	7.9909	7.85934	6.76646	6.83113	6.86944	-2.1824	-1.12592	2.1824	down	7.06575e-12	8.66904e-11
1901	S1PR1	sphingosine-1-phosphate receptor 1	3.64692	3.8582	4.09895	5.32552	5.50575	5.21257	2.78934	1.47992	2.78934	up	5.26058e-09	2.69278e-08
22979	EFR3B	EFR3 homolog B	7.39263	7.28784	7.50795	6.33467	6.41178	6.38384	-2.02704	-1.01938	2.02704	down	2.20633e-10	1.6519e-09
144108	SPTY2D1	SPT2 chromatin protein domain containing 1	6.95621	6.92184	6.80284	7.94701	7.86073	7.97029	2.0454	1.03238	2.0454	up	2.74386e-11	2.7141e-10
650	BMP2	bone morphogenetic protein 2	5.33409	5.0388	5.10316	6.51655	6.43495	6.43801	2.46996	1.30449	2.46996	up	3.68978e-10	2.58305e-09
10276	NET1	neuroepithelial cell transforming 1	7.14393	7.14678	7.2013	6.03488	6.25707	5.93569	-2.12597	-1.08812	2.12597	down	1.15349e-09	7.04273e-09
63967	CLSPN	claspin	6.88752	6.93394	6.94935	4.51797	5.01171	4.78717	-4.44234	-2.15132	4.44234	down	8.14645e-12	9.79423e-11
81689	ISCA1	iron-sulfur cluster assembly 1	9.87407	9.73505	9.656	8.50103	8.45067	8.52672	-2.39867	-1.26223	2.39867	down	4.38048e-13	8.87641e-12
1738	DLD	dihydrolipoamide dehydrogenase	7.2906	7.24588	7.22954	5.65844	5.76839	5.77583	-2.87014	-1.52112	2.87014	down	7.09712e-13	1.31201e-11
7163	TPD52	tumor protein D52	5.70528	5.64816	5.80044	4.2596	3.89885	4.13906	-3.07117	-1.61879	3.07117	down	2.04439e-10	1.5478e-09
26272	FBXO4	F-box protein 4	7.92491	7.88541	7.75624	6.39964	6.34174	6.1597	-2.93866	-1.55516	2.93866	down	2.75783e-12	3.95517e-11
9166	EBAG9	estrogen receptor binding site associated, antigen, 9	7.55048	7.49765	7.67621	6.43517	6.31983	6.50078	-2.22868	-1.15619	2.22868	down	5.72631e-11	5.12038e-10
9372	ZFYVE9	zinc finger, FYVE domain containing 9	6.16619	6.19564	6.40689	7.56743	7.65371	7.65557	2.58351	1.36933	2.58351	up	1.10376e-11	1.2662e-10
151188	ARL6IP6	ADP ribosylation factor like GTPase 6 interacting protein 6	9.24405	9.2802	9.0612	7.28626	7.34852	7.34757	-3.6495	-1.8677	3.6495	down	8.25337e-15	3.70693e-13
958	CD40	CD40 molecule, TNF receptor superfamily member 5	5.52415	5.6327	5.7161	4.41833	4.3185	4.56579	-2.2817	-1.19011	2.2817	down	3.12372e-09	1.69383e-08
221294	NT5DC1	5'-nucleotidase domain containing 1	7.60636	7.48994	7.57655	5.73343	5.88022	6.00127	-3.21758	-1.68598	3.21758	down	1.42644e-12	2.31215e-11
414899	BLID	BH3-like motif containing, cell death inducer	6.10928	6.06131	6.16909	4.87908	5.05629	4.96921	-2.21151	-1.14503	2.21151	down	6.48161e-10	4.22447e-09
29942	PURG	purine-rich element binding protein G	4.20727	4.29583	3.69597	5.62085	5.82781	5.62085	3.08117	1.62348	3.08117	up	9.40066e-09	4.49567e-08
373	TRIM23	tripartite motif containing 23	7.18093	7.17035	7.10274	9.03732	8.95788	8.96067	3.56512	1.83395	3.56512	up	4.93513e-16	4.12594e-14
8614	STC2	stanniocalcin 2	9.5612	9.54263	9.48732	8.5298	8.51572	8.47982	-2.03064	-1.02194	2.03064	down	8.21934e-14	2.29218e-12
10645	CAMKK2	calcium/calmodulin-dependent protein kinase kinase 2, beta	7.77857	7.72865	7.79498	6.72159	6.74733	6.82701	-2.0029	-1.00209	2.0029	down	1.45926e-11	1.59558e-10
105372824	LOC105372824	uncharacterized protein C21orf124	5.4715	4.88701	5.64009	6.61349	6.39179	6.5029	2.2499	1.16986	2.2499	up	1.34829e-06	4.10741e-06
3146	HMGB1	high mobility group box 1	7.69798	7.67237	7.72822	5.43757	5.56899	5.56899	-4.51379	-2.17434	4.51379	down	5.37541e-15	2.64465e-13
1646	AKR1C2	aldo-keto reductase family 1, member C2	10.6858	10.9292	10.4268	12.0038	12.3891	12.2975	2.92722	1.54953	2.92722	up	8.33005e-10	5.28599e-09
10492	SYNCRIP	synaptotagmin binding, cytoplasmic RNA interacting protein	8.75639	8.69663	8.70961	7.43305	7.39197	7.41381	-2.47587	-1.30793	2.47587	down	1.7158e-14	6.55079e-13
101929839	LOC101929839	uncharacterized LOC101929839	7.18027	7.18098	7.17923	8.06661	8.29033	8.19247	2.00413	1.00298	2.00413	up	4.34166e-11	4.03022e-10
80325	ABTB1	ankyrin repeat and BTB (POZ) domain containing 1	6.75837	6.92451	6.94489	8.05819	8.09344	8.03034	2.27321	1.18473	2.27321	up	5.74712e-12	7.2998e-11
11100	HNRNPUL1	heterogeneous nuclear ribonucleoprotein U-like 1	10.0195	10.0784	9.95169	8.25689	8.18317	8.2305	-3.46534	-1.793	3.46534	down	1.9812e-16	2.07708e-14
4040	LRP6	LDL receptor related protein 6	5.02374	4.96397	5.07421	6.20214	6.21405	6.35231	2.35467	1.23553	2.35467	up	1.84194e-10	1.41529e-09
27086	FOXP1	forkhead box P1	5.85515	5.77568	5.72223	4.4759	4.39419	4.35447	-2.59578	-1.37617	2.59578	down	9.80869e-11	8.13794e-10
6884	TAF13	TATA-box binding protein associated factor 13	5.43258	5.43957	5.36147	7.14102	7.0784	6.92593	3.11071	1.63724	3.11071	up	2.11123e-12	3.18234e-11
29943	PADI1	peptidyl arginine deiminase, type I	5.68477	5.52134	5.76396	4.11467	3.84323	4.33921	-2.94375	-1.55765	2.94375	down	2.81812e-09	1.54435e-08
348801	LNP1	leukemia NUP98 fusion partner 1	5.76336	5.82762	5.93083	4.73648	4.61543	4.91704	-2.12033	-1.08429	2.12033	down	1.12506e-08	5.27297e-08
23550	PSD4	pleckstrin and Sec7 domain containing 4	4.87451	4.80183	5.05504	6.02351	5.88251	5.88251	2.02658	1.01905	2.02658	up	1.22036e-08	5.66075e-08
10330	CNPY2	canopy FGF signaling regulator 2	7.82854	7.90887	7.60308	9.00239	8.97835	8.94184	2.28791	1.19403	2.28791	up	2.63932e-11	2.62793e-10
4916	NTRK3	neurotrophic tyrosine kinase, receptor, type 3	4.16984	4.54259	4.72288	3.32779	3.4115	3.65914	-2.01711	-1.01229	2.01711	down	2.6797e-06	7.73662e-06
8895	CPNE3	copine III	8.84002	8.80586	8.75648	6.91573	7.12449	7.07731	-3.39076	-1.76161	3.39076	down	2.15242e-14	7.89491e-13
8774	NAPG	N-ethylmaleimide-sensitive factor attachment protein, gamma	8.22517	8.20744	8.14023	6.91761	6.89682	6.91731	-2.42901	-1.28037	2.42901	down	1.32073e-13	3.39356e-12
1787	TRDMT1	tRNA aspartic acid methyltransferase 1	6.9921	6.78057	6.92422	5.34621	5.56002	5.64036	-2.60888	-1.38343	2.60888	down	2.01939e-10	1.53094e-09
4891	SLC11A2	solute carrier family 11 (proton-coupled divalent metal ion transporter), member 2	8.16483	8.24422	8.12859	9.37629	9.38343	9.4619	2.34241	1.22799	2.34241	up	5.90679e-14	1.76126e-12
256302	NATD1	N-acetyltransferase domain containing 1	5.30117	5.22287	5.20516	6.69437	6.82598	6.92018	2.96996	1.57044	2.96996	up	6.81262e-12	8.42393e-11
8718	TNFRSF25	tumor necrosis factor receptor superfamily member 25	6.98805	6.87112	7.04733	8.37416	8.31776	8.39995	2.63011	1.39512	2.63011	up	2.94193e-13	6.47688e-12
201725	C4orf46	chromosome 4 open reading frame 46	8.19535	8.08145	8.17438	4.77198	5.01024	4.89044	-9.57655	-3.25951	9.57655	down	1.84374e-16	1.97522e-14
26960	NBEA	neurobeachin	5.97881	6.14908	5.85295	7.25469	7.15935	7.1996	2.31487	1.21093	2.31487	up	1.94457e-10	1.48195e-09
84992	PIGY	phosphatidylinositol glycan anchor biosynthesis class Y	9.24177	9.29786	9.14453	8.18225	8.21215	8.24373	-2.02138	-1.01534	2.02138	down	1.33936e-12	2.20102e-11
84681	HINT2	histidine triad nucleotide binding protein 2	9.45134	9.49096	9.51562	8.03071	8.1662	8.1702	-2.57327	-1.3636	2.57327	down	2.70646e-14	9.48349e-13
5728	PTEN	phosphatase and tensin homolog	5.51097	5.53404	5.44711	4.27844	4.44969	4.33112	-2.21037	-1.14429	2.21037	down	1.56316e-09	9.21402e-09
5257	PHKB	phosphorylase kinase, beta	7.84111	7.8455	7.88849	5.48218	5.6726	5.54483	-4.89677	-2.29183	4.89677	down	3.9171e-15	2.0343e-13
3598	IL13RA2	interleukin 13 receptor, alpha 2	10.2286	10.2235	10.2368	11.3238	11.317	11.3262	2.13277	1.09273	2.13277	up	5.27266e-16	4.33419e-14
10640	EXOC5	exocyst complex component 5	8.16463	8.12599	8.03551	5.31941	5.67777	5.62765	-5.92617	-2.5671	5.92617	down	4.636e-14	1.45359e-12
55635	DEPDC1	DEP domain containing 1	8.52043	8.53181	8.3432	3.76372	4.06503	3.9075	-23.4752	-4.55306	23.4752	down	2.45339e-17	4.4246e-15
91653	BOC	BOC cell adhesion associated, oncogene regulated	5.61758	5.42639	5.51981	6.61485	6.60127	6.68876	2.164	1.1137	2.164	up	3.21793e-10	2.29534e-09
440270	GOLGA8B	golgin A8 family member B	4.6268	4.68697	4.6075	5.576	5.8211	5.72436	2.09468	1.06673	2.09468	up	5.35987e-09	2.73682e-08
5420	PODXL	podocalyxin-like	8.59416	8.52594	8.5402	9.78286	9.81981	9.83321	2.39251	1.25853	2.39251	up	3.43842e-15	1.85703e-13
5775	PTPN4	protein tyrosine phosphatase, non-receptor type 4 (megakaryocyte)	7.92346	7.91764	7.97462	9.01305	9.00402	9.03782	2.11363	1.07972	2.11363	up	7.51449e-14	2.132e-12
677800	SNORA12	small nucleolar RNA, H/ACA box 12	5.60044	5.79873	5.92632	7.89896	8.04958	7.98889	4.60749	2.20398	4.60749	up	1.21834e-13	3.18051e-12
55026	TMEM255A	transmembrane protein 255A	7.82293	7.78894	7.55208	6.29338	6.09191	5.87313	-3.10626	-1.63518	3.10626	down	1.23583e-10	9.94804e-10
3964	LGALS8	lectin, galactoside-binding, soluble, 8	7.32554	7.3625	7.37848	6.35819	6.21016	6.42127	-2.03585	-1.02563	2.03585	down	1.84601e-10	1.41759e-09
83879	CDCA7	cell division cycle associated 7	7.9141	8.04675	8.00055	5.92497	6.1437	5.93373	-3.96229	-1.98633	3.96229	down	7.23988e-14	2.06865e-12
9926	LPGAT1	lysophosphatidylglycerol acyltransferase 1	7.23915	7.29826	7.22274	5.83704	6.11875	6.0383	-2.38726	-1.25535	2.38726	down	9.32763e-11	7.77831e-10
51512	GTSE1	G-2 and S-phase expressed 1	8.44991	8.53881	8.47872	5.89656	6.31424	6.25274	-5.04423	-2.33463	5.04423	down	2.63627e-13	5.93388e-12
2150	F2RL1	coagulation factor II (thrombin) receptor-like 1	7.79919	7.82561	7.71411	6.5367	6.68869	6.72264	-2.18903	-1.13029	2.18903	down	2.59876e-11	2.5941e-10
90459	ERI1	exoribonuclease 1	8.17932	8.09331	8.15826	6.9815	6.99509	7.01556	-2.21337	-1.14625	2.21337	down	5.73345e-13	1.09823e-11
84908	FAM136A	family with sequence similarity 136 member A	9.61511	9.69247	9.65649	6.83756	6.90532	7.00003	-6.68249	-2.74039	6.68249	down	6.59914e-18	1.84823e-15
54821	ERCC6L	excision repair cross-complementation group 6 like	7.56379	7.5173	7.50295	5.1921	5.36534	4.96397	-5.11314	-2.35421	5.11314	down	2.73843e-13	6.10773e-12
23246	BOP1	block of proliferation 1	9.27519	9.3924	9.42559	8.13742	8.19567	8.16676	-2.29386	-1.19778	2.29386	down	1.46162e-13	3.67372e-12
150468	CKAP2L	cytoskeleton associated protein 2 like	7.72747	7.70363	7.74008	5.68232	5.79878	5.58246	-4.10071	-2.03587	4.10071	down	2.74743e-14	9.56775e-13
29800	ZDHHC1	zinc finger, DHHC-type containing 1	4.58632	4.61722	4.67269	5.65071	5.71656	5.54388	2.0162	1.01164	2.0162	up	5.45276e-09	2.77882e-08
1102	RCBTB2	regulator of chromosome condensation (RCC1) and BTB (POZ) domain containing protein 2	4.93184	4.71356	4.69516	6.04952	6.11386	6.20137	2.53397	1.3414	2.53397	up	3.3986e-10	2.40757e-09
58485	TRAPPC1	trafficking protein particle complex 1	9.34972	9.32505	9.39828	7.70827	7.68523	7.80329	-3.08532	-1.62542	3.08532	down	1.71073e-15	1.08716e-13
699	BUB1	BUB1, mitotic checkpoint serine/threonine kinase	9.06062	9.10481	9.01714	6.31905	6.54266	6.52356	-6.05909	-2.5991	6.05909	down	3.21771e-16	2.97563e-14
23576	DDAH1	dimethylarginine dimethylaminohydrolase 1	6.62648	6.57668	6.89323	4.79367	4.97143	4.79431	-3.59417	-1.84566	3.59417	down	1.33073e-11	1.47729e-10
55732	C1orf112	chromosome 1 open reading frame 112	6.74693	6.83868	6.88333	4.98353	4.8712	4.68768	-3.93267	-1.97551	3.93267	down	1.67599e-12	2.64217e-11
7769	ZNF226	zinc finger protein 226	6.5087	6.54629	6.57763	7.86827	7.79578	7.77104	2.40742	1.26749	2.40742	up	7.44939e-13	1.363e-11
9358	ITGBL1	integrin beta like 1	6.74432	6.65878	6.67496	5.53816	5.48631	5.55418	-2.24462	-1.16647	2.24462	down	5.00825e-11	4.55834e-10
10687	PNMA2	paraneoplastic Ma antigen 2	6.97632	7.00613	6.8951	5.78505	5.7353	5.85765	-2.24469	-1.16652	2.24469	down	4.47413e-11	4.13654e-10
7913	DEK	DEK proto-oncogene	10.227	10.2862	10.1968	8.73504	8.69129	8.78954	-2.82462	-1.49806	2.82462	down	8.83525e-16	6.51184e-14
84529	C15orf41	chromosome 15 open reading frame 41	7.67771	7.39034	7.27313	6.26581	6.33046	6.34841	-2.19188	-1.13217	2.19188	down	2.69686e-09	1.4883e-08
9120	SLC16A6	solute carrier family 16, member 6	3.79631	3.68058	3.57447	8.083	8.14839	8.17154	21.8646	4.45052	21.8646	up	6.72007e-18	1.86246e-15
100529067	SERF2-C15ORF63	SERF2-C15orf63 readthrough	9.34758	9.39271	9.37854	8.20943	8.21877	8.16593	-2.25777	-1.1749	2.25777	down	1.25356e-14	5.1522e-13
11270	NRM	nurim (nuclear envelope membrane protein)	8.51927	8.63265	8.64782	7.40687	7.50207	7.67734	-2.10111	-1.07115	2.10111	down	9.82541e-11	8.15008e-10
718	C3	complement component 3	5.10772	5.1196	5.43861	8.08257	8.06359	8.11121	7.27937	2.86381	7.27937	up	7.24709e-15	3.32349e-13
64921	CASD1	CAS1 domain containing 1	6.86385	6.71037	6.91127	7.93194	7.96664	7.99074	2.19559	1.13461	2.19559	up	1.29821e-11	1.44836e-10
25764	HYPK	huntingtin interacting protein K	9.34758	9.39271	9.37854	8.20943	8.21877	8.16593	-2.25777	-1.1749	2.25777	down	1.25356e-14	5.1522e-13
5422	POLA1	polymerase (DNA directed), alpha 1, catalytic subunit	8.30401	8.27297	8.38709	6.31804	6.34359	6.35891	-3.94815	-1.98118	3.94815	down	1.25765e-15	8.48752e-14
1316	KLF6	Kruppel-like factor 6	8.19019	8.26593	8.19826	6.66159	6.74318	6.64416	-2.89819	-1.53515	2.89819	down	3.27914e-14	1.10138e-12
57190	SEPN1	selenoprotein N, 1	7.47003	7.40559	7.45064	6.32709	6.44027	6.41456	-2.06782	-1.04811	2.06782	down	2.44833e-11	2.46186e-10
23015	GOLGA8A	golgin A8 family member A	4.6268	4.68697	4.6075	5.576	5.8211	5.72436	2.09468	1.06673	2.09468	up	5.35987e-09	2.73682e-08
2633	GBP1	guanylate binding protein 1, interferon-inducible	6.45276	6.42472	6.43641	5.37349	5.41018	5.39451	-2.0637	-1.04524	2.0637	down	2.29256e-10	1.70993e-09
170371	C10orf128	chromosome 10 open reading frame 128	8.06929	8.28247	8.34172	7.24183	7.1787	7.15319	-2.05611	-1.03992	2.05611	down	1.80222e-10	1.38886e-09
4089	SMAD4	SMAD family member 4	7.24965	7.11584	7.45245	5.86061	5.74386	5.72677	-2.81975	-1.49557	2.81975	down	4.12789e-11	3.85522e-10
84864	MINA	MYC induced nuclear antigen	6.17907	6.12526	6.18787	4.36282	4.15308	3.99547	-3.98232	-1.99361	3.98232	down	7.44001e-12	9.04006e-11
10656	KHDRBS3	KH domain containing, RNA binding, signal transduction associated 3	8.22526	8.15139	8.05276	6.25492	6.35603	6.37158	-3.52013	-1.81563	3.52013	down	3.27552e-14	1.10138e-12
22902	RUFY3	RUN and FYVE domain containing 3	7.32458	7.24414	7.33612	8.3101	8.35835	8.42981	2.09141	1.06447	2.09141	up	2.68592e-12	3.87187e-11
2202	EFEMP1	EGF containing fibulin-like extracellular matrix protein 1	5.46075	5.43102	5.66702	4.23872	3.89367	4.06996	-2.73615	-1.45215	2.73615	down	1.4017e-09	8.36921e-09
644538	SMIM10	small integral membrane protein 10	7.81865	7.76378	7.84676	6.03859	5.95504	5.90419	-3.58952	-1.84379	3.58952	down	2.18045e-14	7.98144e-13
51714	SELT	selenoprotein T	9.3139	9.26035	9.39814	7.11249	7.17504	7.14693	-4.52937	-2.17931	4.52937	down	7.08201e-17	9.57536e-15
57103	TIGAR	TP53 induced glycolysis regulatory phosphatase	8.30149	8.14653	8.25524	9.27274	9.24346	9.249	2.02883	1.02065	2.02883	up	1.03735e-12	1.7942e-11
89839	ARHGAP11B	Rho GTPase activating protein 11B	8.47355	8.44882	8.39128	6.28596	6.3501	6.20032	-4.46633	-2.15909	4.46633	down	9.41461e-16	6.86147e-14
441282	AKR1B15	aldo-keto reductase family 1, member B15	8.30618	8.29163	8.19584	6.93616	7.01872	6.96649	-2.44657	-1.29076	2.44657	down	2.70815e-13	6.04707e-12
8714	ABCC3	ATP binding cassette subfamily C member 3	6.40212	6.60847	6.62017	4.51195	4.81896	4.60606	-3.72678	-1.89793	3.72678	down	1.2064e-11	1.36085e-10
2131	EXT1	exostosin glycosyltransferase 1	9.75235	9.83137	9.78065	8.04222	8.03013	8.05157	-3.35617	-1.74682	3.35617	down	5.82905e-17	8.31116e-15
23708	GSPT2	G1 to S phase transition 2	6.65342	6.62873	6.66345	8.28511	8.04009	8.08154	2.80315	1.48705	2.80315	up	1.10322e-12	1.88979e-11
79832	QSER1	glutamine and serine rich 1	10.1426	10.237	10.1826	8.9365	8.90041	8.94406	-2.39562	-1.2604	2.39562	down	3.1292e-15	1.73545e-13
9221	NOLC1	nucleolar and coiled-body phosphoprotein 1	7.46204	7.60747	7.65793	6.24751	6.393	6.33544	-2.37923	-1.2505	2.37923	down	1.88517e-11	1.97852e-10
4796	TONSL	tonsoku-like, DNA repair protein	5.55067	5.44059	5.55067	4.24089	4.63049	4.54956	-2.0567	-1.04033	2.0567	down	7.63514e-08	2.95885e-07
6791	AURKAPS1	aurora kinase A pseudogene 1	10.0363	9.8864	9.89929	7.7629	7.82065	7.78269	-4.44422	-2.15193	4.44422	down	6.31744e-17	8.91032e-15
8407	TAGLN2	transgelin 2	12.2997	12.2747	12.2926	10.1926	10.2899	10.3128	-4.06675	-2.02388	4.06675	down	2.93583e-18	1.10686e-15
25936	NSL1	NSL1, MIS12 kinetochore complex component	6.19209	5.82674	6.31999	4.35	4.65505	4.80183	-2.84938	-1.51065	2.84938	down	1.75448e-08	7.85487e-08
4803	NGF	nerve growth factor (beta polypeptide)	6.1437	6.12635	6.27239	4.82179	4.80173	4.64737	-2.68301	-1.42385	2.68301	down	7.25802e-11	6.26154e-10
80205	CHD9	chromodomain helicase DNA binding protein 9	6.3007	6.49158	6.50586	7.53328	7.55742	7.64899	2.21481	1.14718	2.21481	up	6.26287e-11	5.51836e-10
8745	ADAM23	ADAM metallopeptidase domain 23	6.46344	6.45818	6.47632	7.49449	7.59819	7.77001	2.22671	1.15492	2.22671	up	8.06182e-11	6.87182e-10
283742	FAM98B	family with sequence similarity 98 member B	9.18051	9.16019	9.12399	6.7627	6.58328	6.67815	-5.5797	-2.48019	5.5797	down	6.16815e-17	8.73116e-15
83719	YPEL3	yippee like 3	6.26093	6.42144	6.36206	8.16559	8.23704	8.25769	3.6603	1.87196	3.6603	up	1.10211e-14	4.65205e-13
1122	CHML	choroideremia-like (Rab escort protein 2)	5.85283	5.78191	5.89666	4.61401	4.49105	4.90833	-2.25429	-1.17267	2.25429	down	1.66154e-08	7.48755e-08
27229	TUBGCP4	tubulin, gamma complex associated protein 4	7.52607	7.47161	7.55928	5.94975	6.09645	6.06821	-2.79113	-1.48085	2.79113	down	7.66233e-13	1.3948e-11
8601	RGS20	regulator of G-protein signaling 20	10.0108	9.96536	9.95495	8.59413	8.58692	8.65514	-2.57572	-1.36497	2.57572	down	1.16081e-15	8.04159e-14
580	BARD1	BRCA1 associated RING domain 1	7.73355	7.65703	7.7607	5.47027	5.576	5.59816	-4.49696	-2.16895	4.49696	down	6.36883e-15	3.00508e-13
23275	POFUT2	protein O-fucosyltransferase 2	6.75119	6.93133	6.88533	8.06807	8.08615	8.16118	2.37707	1.24918	2.37707	up	2.61805e-12	3.78795e-11
10513	APPBP2	amyloid beta precursor protein (cytoplasmic tail) binding protein 2	7.58439	7.58999	7.53968	6.31469	6.42504	6.43933	-2.26315	-1.17833	2.26315	down	5.22023e-12	6.74932e-11
24147	FJX1	four jointed box 1	9.01021	8.90943	8.88901	7.91709	7.85458	7.93565	-2.04738	-1.03378	2.04738	down	1.19232e-12	2.01079e-11
285368	PRRT3	proline-rich transmembrane protein 3	6.63956	6.60555	6.86984	8.01298	7.92044	7.8675	2.34349	1.22866	2.34349	up	6.08376e-11	5.38839e-10
9456	HOMER1	homer scaffolding protein 1	5.75094	5.76167	5.63918	4.70815	4.61856	4.68803	-2.06434	-1.04568	2.06434	down	2.45457e-09	1.3708e-08
163786	SASS6	SAS-6 centriolar assembly protein	7.40093	7.34791	7.26815	6.00554	6.12138	6.07895	-2.41224	-1.27037	2.41224	down	6.97567e-12	8.57149e-11
64105	CENPK	centromere protein K	8.80621	8.80621	8.73416	6.14295	6.22747	6.14295	-6.10957	-2.61107	6.10957	down	2.12966e-17	4.01461e-15
113174	SAAL1	serum amyloid A like 1	8.51227	8.45407	8.50926	7.32209	7.29743	7.33338	-2.25673	-1.17423	2.25673	down	1.13428e-13	3.00711e-12
89958	SAPCD2	suppressor APC domain containing 2	8.00012	7.81025	7.92579	5.952	5.9149	5.81995	-4.04583	-2.01644	4.04583	down	2.63936e-14	9.30659e-13
84100	ARL6	ADP ribosylation factor like GTPase 6	6.67344	6.75081	6.63134	5.74274	5.73687	5.37943	-2.09292	-1.06552	2.09292	down	1.66911e-08	7.51618e-08
23522	KAT6B	K(lysine) acetyltransferase 6B	6.20671	6.17756	6.08707	7.26069	7.36141	7.24875	2.1934	1.13317	2.1934	up	2.87453e-11	2.8234e-10
57198	ATP8B2	ATPase, aminophospholipid transporter, class I, type 8B, member 2	7.05029	7.1291	7.2626	8.6925	8.77216	8.74607	3.00962	1.58958	3.00962	up	7.15342e-14	2.05502e-12
55345	ZGRF1	zinc finger, GRF-type containing 1	6.61237	6.41929	6.48348	4.78969	5.2044	4.95974	-2.86878	-1.52044	2.86878	down	4.70646e-10	3.20216e-09
51108	METTL9	methyltransferase like 9	8.9946	8.95298	9.04699	6.55825	6.45795	6.56443	-5.54548	-2.47131	5.54548	down	3.57204e-17	5.76378e-15
51012	PRELID3B	PRELI domain containing 3B	8.26834	8.27558	8.1728	6.69699	6.75066	6.46011	-3.03772	-1.60299	3.03772	down	1.81584e-12	2.82312e-11
80144	FRAS1	Fraser extracellular matrix complex subunit 1	3.42527	3.36553	3.61491	4.97341	5.28405	5.12462	3.15752	1.65879	3.15752	up	2.65308e-10	1.94045e-09
333	APLP1	amyloid beta (A4) precursor-like protein 1	7.5278	7.59906	7.56255	8.62161	8.62854	8.58788	2.06987	1.04954	2.06987	up	3.55714e-13	7.54328e-12
7057	THBS1	thrombospondin 1	9.06613	8.99116	8.90947	7.26513	7.21952	7.15579	-3.42342	-1.77544	3.42342	down	4.27148e-15	2.17795e-13
122769	LRR1	leucine rich repeat protein 1	9.65419	9.55415	9.61638	7.74479	7.77452	7.67975	-3.66858	-1.87522	3.66858	down	1.69999e-16	1.85157e-14
6419	SETMAR	SET domain and mariner transposase fusion gene	6.51575	6.42526	6.53756	4.86885	5.11762	4.86892	-2.91008	-1.54106	2.91008	down	4.01284e-11	3.7624e-10
266977	ADGRF1	adhesion G protein-coupled receptor F1	3.38381	3.62223	3.62842	4.76393	4.51195	4.36237	2.00175	1.00126	2.00175	up	4.63905e-07	1.54255e-06
138162	C9orf116	chromosome 9 open reading frame 116	6.30742	6.35958	6.47346	7.34566	7.47738	7.45111	2.06274	1.04456	2.06274	up	1.18091e-10	9.55892e-10
55197	RPRD1A	regulation of nuclear pre-mRNA domain containing 1A	6.93311	7.03382	6.79781	4.96472	4.85969	4.92192	-4.01705	-2.00614	4.01705	down	3.91475e-13	8.16474e-12
121260	SLC15A4	solute carrier family 15 (oligopeptide transporter), member 4	8.77249	8.81851	8.77665	9.88193	9.86653	9.85127	2.11017	1.07736	2.11017	up	1.05338e-14	4.52295e-13
5569	PKIA	protein kinase (cAMP-dependent, catalytic) inhibitor alpha	8.64098	8.53954	8.28818	7.40068	7.19249	7.2291	-2.32217	-1.21548	2.32217	down	4.12994e-10	2.85448e-09
11130	ZWINT	ZW10 interacting kinetochore protein	9.59246	9.67589	9.66243	7.32354	7.21349	7.22161	-5.24417	-2.39071	5.24417	down	1.34498e-17	2.83531e-15
125113	KRT222	keratin 222, type II	6.88025	6.77874	6.82912	5.03691	5.03752	5.09793	-3.41507	-1.77192	3.41507	down	3.40098e-13	7.27907e-12
9241	NOG	noggin	5.54544	5.5066	5.37681	7.33024	7.04961	7.23369	3.31321	1.72823	3.31321	up	4.50513e-12	5.99207e-11
55723	ASF1B	anti-silencing function 1B histone chaperone	8.74408	8.78257	8.76743	6.05239	6.01075	6.19891	-6.39677	-2.67734	6.39677	down	8.52853e-17	1.09282e-14
5825	ABCD3	ATP binding cassette subfamily D member 3	7.42719	7.36839	7.46229	8.42338	8.50623	8.52603	2.09351	1.06592	2.09351	up	1.50592e-12	2.42493e-11
25946	ZNF385A	zinc finger protein 385A	6.03713	5.67649	5.93553	7.04316	6.94255	6.9308	2.12744	1.08912	2.12744	up	4.32083e-09	2.26255e-08
5557	PRIM1	primase, DNA, polypeptide 1 (49kDa)	8.50002	8.5264	8.55322	6.07887	5.99103	6.04729	-5.60799	-2.48748	5.60799	down	4.7538e-17	7.1382e-15
5165	PDK3	pyruvate dehydrogenase kinase, isozyme 3	6.93563	6.90195	6.95553	8.27141	8.25071	8.33537	2.5576	1.35479	2.5576	up	6.27424e-14	1.85066e-12
50859	SPOCK3	sparc/osteonectin, cwcv and kazal-like domains proteoglycan (testican) 3	3.71441	3.50311	4.05477	5.13102	5.08996	5.11284	2.55592	1.35384	2.55592	up	2.19665e-08	9.60206e-08
3832	KIF11	kinesin family member 11	9.87758	9.8824	9.93299	7.2743	7.31557	7.4202	-5.90103	-2.56097	5.90103	down	5.51557e-18	1.68339e-15
8945	BTRC	beta-transducin repeat containing E3 ubiquitin protein ligase	5.96806	5.85461	5.8894	7.22723	7.24522	7.20208	2.49808	1.32082	2.49808	up	2.834e-12	4.0496e-11
348995	NUP43	nucleoporin 43kDa	8.05188	8.00157	8.06345	5.19786	5.26217	5.31722	-6.86797	-2.77988	6.86797	down	1.21911e-16	1.44853e-14
54210	TREM1	triggering receptor expressed on myeloid cells 1	3.36918	3.49293	3.89493	5.48405	5.30069	5.29293	3.41893	1.77354	3.41893	up	1.07876e-09	6.62666e-09
9833	MELK	maternal embryonic leucine zipper kinase	9.32581	9.4756	9.37257	5.51762	5.56608	5.38483	-14.9473	-3.90182	14.9473	down	1.37645e-18	6.82679e-16
3099	HK2	hexokinase 2	6.73167	6.78482	6.97996	8.02378	7.96823	8.04014	2.26352	1.17857	2.26352	up	2.69518e-11	2.67336e-10
9218	VAPA	VAMP associated protein A	9.0044	8.98973	8.98662	7.14408	7.21279	7.1818	-3.51622	-1.81403	3.51622	down	1.88565e-16	2.01461e-14
6654	SOS1	SOS Ras/Rac guanine nucleotide exchange factor 1	7.98649	8.04823	8.08896	9.01141	9.06308	9.15861	2.05121	1.03647	2.05121	up	2.03206e-12	3.08945e-11
55304	SPTLC3	serine palmitoyltransferase, long chain base subunit 3	9.17272	9.12148	9.16887	7.28863	7.32986	7.37111	-3.54182	-1.82449	3.54182	down	2.05269e-16	2.11641e-14
286	ANK1	ankyrin 1	6.0582	6.29345	6.09217	4.9563	5.18416	5.20257	-2.04712	-1.0336	2.04712	down	1.94383e-08	8.60534e-08
10055	SAE1	SUMO1 activating enzyme subunit 1	10.7749	10.8542	10.7275	9.75635	9.72507	9.76824	-2.05005	-1.03566	2.05005	down	6.00187e-14	1.78418e-12
4133	MAP2	microtubule associated protein 2	5.73584	5.4846	5.81947	4.15816	4.05168	3.87653	-3.1409	-1.65118	3.1409	down	3.32898e-10	2.3664e-09
9270	ITGB1BP1	integrin beta 1 binding protein 1	7.50126	7.52097	7.38889	5.79694	6.04515	5.9073	-2.93612	-1.55391	2.93612	down	3.76581e-12	5.17915e-11
4173	MCM4	minichromosome maintenance complex component 4	9.32437	9.33076	9.28567	8.14274	8.1557	8.10743	-2.26312	-1.17831	2.26312	down	1.29066e-14	5.26604e-13
7681	MKRN3	makorin ring finger protein 3	5.51946	5.55058	5.51421	7.07837	7.11136	6.9299	2.85164	1.51179	2.85164	up	2.8461e-12	4.06246e-11
4900	NRGN	neurogranin	6.16597	6.17995	6.2038	4.91918	4.43921	4.96905	-2.65264	-1.40743	2.65264	down	1.00711e-08	4.78015e-08
1290	COL5A2	collagen, type V, alpha 2	8.43493	8.52913	8.49712	10.009	9.91228	9.92665	2.75536	1.46224	2.75536	up	2.24104e-15	1.34678e-13
8338	HIST2H2AC	histone cluster 2, H2ac	6.50645	6.35369	6.53567	4.9868	5.22361	5.12751	-2.55377	-1.35263	2.55377	down	1.8803e-10	1.44053e-09
4828	NMB	neuromedin B	8.09822	8.08665	8.1027	9.42999	9.48455	9.4588	2.57028	1.36192	2.57028	up	1.29826e-15	8.68684e-14
57494	RIMKLB	ribosomal modification protein rimK-like family member B	6.04136	5.91705	5.75326	4.4277	4.49982	4.34011	-2.79209	-1.48135	2.79209	down	1.97406e-10	1.49976e-09
5878	RAB5C	RAB5C, member RAS oncogene family	8.90567	8.93004	8.99619	7.53495	7.38311	7.47261	-2.79028	-1.48041	2.79028	down	2.88077e-14	9.93447e-13
9840	TESPA1	thymocyte expressed, positive selection associated 1	5.3499	5.58299	5.40756	4.28735	4.11991	4.17703	-2.3818	-1.25205	2.3818	down	1.6552e-09	9.70693e-09
5500	PPP1CB	protein phosphatase 1, catalytic subunit, beta isozyme	9.35481	9.34179	9.17956	7.23443	7.28418	7.45785	-3.90837	-1.96657	3.90837	down	2.26045e-14	8.16889e-13
5747	PTK2	protein tyrosine kinase 2	7.96263	8.09491	8.00257	6.67202	6.79951	6.58018	-2.52474	-1.33613	2.52474	down	4.24652e-12	5.70616e-11
79901	CYBRD1	cytochrome b reductase 1	7.5914	7.57392	7.67122	8.80226	8.83113	8.82291	2.30791	1.20659	2.30791	up	6.6881e-14	1.94362e-12
23729	SHPK	sedoheptulokinase	7.59339	7.5954	7.63573	8.57215	8.62458	8.63222	2.00205	1.00148	2.00205	up	6.01106e-13	1.14248e-11
25957	PNISR	PNN-interacting serine/arginine-rich protein	7.58126	7.64873	7.5425	8.64754	8.67196	8.66272	2.0993	1.06991	2.0993	up	4.32316e-13	8.78546e-12
9088	PKMYT1	protein kinase, membrane associated tyrosine/threonine 1	8.04122	7.92921	7.9832	7.28668	6.74071	6.78402	-2.06681	-1.04741	2.06681	down	1.39942e-07	5.13823e-07
8091	HMGA2	high mobility group AT-hook 2	10.6272	10.6257	10.6538	9.16929	9.15831	9.12073	-2.80135	-1.48612	2.80135	down	5.64109e-17	8.13188e-15
6744	SSFA2	sperm specific antigen 2	8.61546	8.432	8.11021	7.2447	7.29634	7.23609	-2.18381	-1.12685	2.18381	down	7.58138e-09	3.71118e-08
56906	THAP10	THAP domain containing 10	8.17719	8.06211	8.04101	6.9815	7.02939	6.94572	-2.15532	-1.1079	2.15532	down	4.15465e-12	5.6084e-11
51616	TAF9B	TATA-box binding protein associated factor 9b	9.093	9.15828	9.15084	6.608	6.60409	6.65892	-5.69766	-2.51037	5.69766	down	6.15135e-18	1.75559e-15
125170	MIEF2	mitochondrial elongation factor 2	6.67764	6.51976	6.79544	7.74659	7.87909	7.83523	2.22842	1.15602	2.22842	up	1.06941e-10	8.76495e-10
57658	CALCOCO1	calcium binding and coiled-coil domain 1	5.55041	5.40798	5.56923	6.98602	7.04008	7.03053	2.84745	1.50967	2.84745	up	2.56779e-12	3.73391e-11
4286	MITF	microphthalmia-associated transcription factor	5.85718	5.8276	6.01478	4.02436	3.93389	4.03238	-3.73984	-1.90298	3.73984	down	2.78484e-12	3.991e-11
10630	PDPN	podoplanin	7.57801	7.66655	7.57866	8.68421	8.633	8.52624	2.00937	1.00674	2.00937	up	7.92173e-12	9.55251e-11
79077	DCTPP1	dCTP pyrophosphatase 1	9.74166	9.75884	9.75602	8.19861	8.15138	8.16803	-2.98866	-1.5795	2.98866	down	1.07359e-16	1.30732e-14
65983	GRAMD3	GRAM domain containing 3	4.82745	4.86495	4.68641	3.6951	3.71441	3.79982	-2.07987	-1.05649	2.07987	down	1.07715e-08	5.07208e-08
4232	MEST	mesoderm specific transcript	9.0238	8.99313	9.02338	6.92302	6.8695	6.90549	-4.3292	-2.1141	4.3292	down	3.11692e-17	5.31366e-15
64648	SPANXD	SPANX family member D	3.32433	3.67032	3.95257	5.18786	5.25994	5.41988	3.11699	1.64015	3.11699	up	8.01859e-09	3.90085e-08
81839	VANGL1	VANGL planar cell polarity protein 1	7.56444	7.57212	7.44324	5.97264	6.00471	6.03526	-2.87268	-1.5224	2.87268	down	3.8375e-13	8.02927e-12
9645	MICAL2	microtubule associated monooxygenase, calponin and LIM domain containing 2	10.9846	10.9692	11.0037	9.54769	9.62151	9.65022	-2.60146	-1.37932	2.60146	down	4.867e-16	4.09518e-14
899	CCNF	cyclin F	5.93271	5.82828	6.10942	4.3609	4.5544	4.54924	-2.76758	-1.46862	2.76758	down	3.06994e-10	2.20341e-09
5874	RAB27B	RAB27B, member RAS oncogene family	7.74776	7.84201	7.82056	9.23751	9.18067	9.19248	2.63922	1.40011	2.63922	up	5.91809e-15	2.84373e-13
90226	UCN2	urocortin 2	5.6579	5.84453	5.99761	7.05748	7.07388	7.26978	2.46291	1.30037	2.46291	up	6.22405e-10	4.07421e-09
29767	TMOD2	tropomodulin 2	6.10539	6.22578	5.81453	5.12762	4.78942	4.85703	-2.17932	-1.12388	2.17932	down	1.02624e-07	3.87528e-07
27295	PDLIM3	PDZ and LIM domain 3	4.89357	4.9258	4.8724	3.81317	3.64383	3.75221	-2.2359	-1.16085	2.2359	down	2.24523e-09	1.2698e-08
4734	NEDD4	neural precursor cell expressed, developmentally down-regulated 4, E3 ubiquitin protein ligase	8.74159	8.9825	8.51771	7.61856	7.48119	7.61179	-2.26067	-1.17675	2.26067	down	2.17291e-09	1.23264e-08
7582	ZNF33B	zinc finger protein 33B	3.62311	3.85497	3.93918	5.17888	5.42143	5.45383	2.91931	1.54563	2.91931	up	8.92474e-10	5.6062e-09
51054	PLEKHA8P1	pleckstrin homology domain containing A8 pseudogene 1	6.75783	6.87382	6.87796	5.71389	5.68648	5.68844	-2.20422	-1.14027	2.20422	down	5.62736e-11	5.04225e-10
5355	PLP2	proteolipid protein 2 (colonic epithelium-enriched)	11.6839	11.7126	11.6842	9.6964	9.6921	9.71006	-3.98352	-1.99404	3.98352	down	2.33177e-19	2.53969e-16
6241	RRM2	ribonucleotide reductase M2	11.2051	11.1295	11.2171	6.56212	6.40434	6.43698	-26.2838	-4.7161	26.2838	down	2.76202e-21	3.60996e-17
50484	RRM2B	ribonucleotide reductase M2 B (TP53 inducible)	9.24085	9.29278	9.17423	10.3531	10.2869	10.2579	2.08982	1.06338	2.08982	up	1.33101e-13	3.4155e-12
2091	FBL	fibrillarin	11.4651	11.4899	11.5214	9.98447	9.96127	10.0283	-2.83	-1.5008	2.83	down	4.41215e-17	6.75782e-15
2842	GPR19	G protein-coupled receptor 19	5.43533	5.35296	5.34167	3.71037	4.22499	3.87975	-2.70998	-1.43828	2.70998	down	6.77249e-09	3.35756e-08
7543	ZFX	zinc finger protein, X-linked	4.95387	4.81448	4.96781	6.04374	6.07738	6.10699	2.24075	1.16398	2.24075	up	4.27266e-10	2.93811e-09
51209	RAB9B	RAB9B, member RAS oncogene family	5.56339	5.49834	5.63174	4.2094	4.58893	4.49575	-2.19334	-1.13313	2.19334	down	2.25638e-08	9.83465e-08
7786	MAP3K12	mitogen-activated protein kinase kinase kinase 12	6.07759	6.31911	6.35893	7.3029	7.36905	7.32821	2.11625	1.08151	2.11625	up	5.85771e-10	3.86278e-09
93664	CADPS2	Ca++-dependent secretion activator 2	6.12812	5.82307	5.98791	4.77716	5.05245	4.97926	-2.06109	-1.04341	2.06109	down	3.97116e-08	1.63922e-07
129642	MBOAT2	membrane bound O-acyltransferase domain containing 2	7.59023	7.69838	7.7436	6.11149	6.19035	6.16168	-2.87367	-1.5229	2.87367	down	3.50072e-13	7.44378e-12
494143	CHAC2	ChaC, cation transport regulator homolog 2 (E. coli)	7.0906	7.13666	6.97424	5.749	5.66273	5.60214	-2.63148	-1.39588	2.63148	down	9.95127e-12	1.15543e-10
8850	KAT2B	K(lysine) acetyltransferase 2B	8.578	8.65228	8.58775	6.96536	6.84999	7.02568	-3.15798	-1.659	3.15798	down	2.20287e-14	8.04233e-13
1520	CTSS	cathepsin S	7.23077	7.09314	7.28841	5.69397	5.7737	5.74693	-2.76237	-1.46591	2.76237	down	3.64992e-12	5.0392e-11
64093	SMOC1	SPARC related modular calcium binding 1	6.85816	6.79404	6.95806	8.10604	8.0644	8.12723	2.34427	1.22914	2.34427	up	1.44285e-12	2.33584e-11
5019	OXCT1	3-oxoacid CoA-transferase 1	9.25737	9.33831	9.18613	7.34326	7.32436	7.29623	-3.83525	-1.93932	3.83525	down	3.73897e-16	3.33952e-14
5036	PA2G4	proliferation-associated 2G4	11.1832	11.2404	11.238	9.77293	9.70004	9.6736	-2.83828	-1.50502	2.83828	down	1.92084e-16	2.03008e-14
91607	SLFN11	schlafen family member 11	6.44695	6.2639	6.50259	4.45563	4.56652	4.45385	-3.76456	-1.91248	3.76456	down	2.38307e-12	3.51941e-11
2218	FKTN	fukutin	8.06761	8.01974	8.05957	6.12096	6.11939	6.21007	-3.72912	-1.89883	3.72912	down	3.83004e-15	2.00691e-13
801	CALM1	calmodulin 1 (phosphorylase kinase, delta)	10.5006	10.4236	10.4347	9.27022	9.32115	9.32376	-2.21591	-1.1479	2.21591	down	6.63396e-15	3.10033e-13
11073	TOPBP1	topoisomerase (DNA) II binding protein 1	9.41317	9.44147	9.34471	8.08024	8.1948	8.24123	-2.34192	-1.22769	2.34192	down	2.29693e-13	5.2947e-12
805	CALM2	calmodulin 2 (phosphorylase kinase, delta)	10.5006	10.4236	10.4347	9.27022	9.32115	9.32376	-2.21591	-1.1479	2.21591	down	6.63396e-15	3.10033e-13
23272	FAM208A	family with sequence similarity 208 member A	8.89543	8.89104	8.82386	7.50909	7.69925	7.52123	-2.45137	-1.29359	2.45137	down	6.92857e-13	1.28753e-11
4191	MDH2	malate dehydrogenase 2	6.28994	6.36986	6.61409	5.4867	5.4657	5.29741	-2.01116	-1.00803	2.01116	down	2.50596e-08	1.08095e-07
701	BUB1B	BUB1B, mitotic checkpoint serine/threonine kinase	9.44249	9.40808	9.43293	7.14421	7.1649	7.18682	-4.7983	-2.26252	4.7983	down	4.29771e-18	1.40428e-15
1839	HBEGF	heparin-binding EGF-like growth factor	6.89062	6.83481	6.90239	5.7321	5.681	5.82834	-2.18676	-1.12879	2.18676	down	7.91366e-11	6.76318e-10
9126	SMC3	structural maintenance of chromosomes 3	9.27414	9.29224	9.18469	8.19109	8.10664	8.16402	-2.13826	-1.09644	2.13826	down	2.42823e-13	5.54978e-12
9232	PTTG1	pituitary tumor-transforming 1	11.7412	11.7242	11.6548	10.0911	10.1422	10.1899	-2.96014	-1.56566	2.96014	down	1.39836e-16	1.58467e-14
10024	TROAP	trophinin associated protein	7.71667	7.77032	7.78107	6.07124	6.15517	6.33409	-2.96737	-1.56919	2.96737	down	1.5788e-12	2.51799e-11
7803	PTP4A1	protein tyrosine phosphatase type IVA, member 1	9.17915	9.185	8.9514	7.9446	7.81101	7.7259	-2.42505	-1.27801	2.42505	down	1.90063e-11	1.99056e-10
10053	AP1M2	adaptor-related protein complex 1 mu 2 subunit	6.38007	6.27868	6.37543	5.1009	5.05822	5.0607	-2.41405	-1.27145	2.41405	down	4.96548e-11	4.52783e-10
57456	KIAA1143	KIAA1143	7.91604	7.99803	8.01267	6.4804	6.5922	6.62573	-2.6564	-1.40947	2.6564	down	4.58626e-13	9.20016e-12
6515	SLC2A3	solute carrier family 2 (facilitated glucose transporter), member 3	6.8388	6.89087	6.99288	7.99842	7.97079	8.08742	2.16049	1.11136	2.16049	up	9.35866e-12	1.09866e-10
54796	BNC2	basonuclin 2	6.14731	5.91822	6.19907	4.96447	5.06163	4.88909	-2.16816	-1.11647	2.16816	down	5.62574e-09	2.85363e-08
80237	ELL3	elongation factor RNA polymerase II-like 3	5.42852	5.34554	5.50578	4.15364	4.46753	4.07007	-2.29135	-1.1962	2.29135	down	1.99259e-08	8.79343e-08
26010	SPATS2L	spermatogenesis associated, serine rich 2 like	7.03845	6.92794	6.95008	5.6179	5.54163	5.68081	-2.56456	-1.35871	2.56456	down	9.10745e-12	1.07303e-10
2921	CXCL3	chemokine (C-X-C motif) ligand 3	3.42328	3.67265	3.37577	5.5724	5.44093	5.48935	4.02873	2.01033	4.02873	up	8.75888e-12	1.03945e-10
388403	YPEL2	yippee like 2	5.79841	5.82292	5.83261	7.018	7.00268	6.99139	2.27528	1.18604	2.27528	up	9.65482e-12	1.1287e-10
112616	CMTM7	CKLF-like MARVEL transmembrane domain containing 7	6.84186	6.7977	6.97362	8.1373	8.04375	8.18618	2.38064	1.25135	2.38064	up	4.18345e-12	5.63882e-11
1062	CENPE	centromere protein E	9.03171	9.12568	9.08422	6.83497	6.81724	6.87515	-4.7177	-2.23808	4.7177	down	3.29122e-17	5.49143e-15
5567	PRKACB	protein kinase, cAMP-dependent, beta catalytic subunit	6.51296	6.37819	6.37776	4.82491	4.64872	4.63482	-3.29471	-1.72015	3.29471	down	6.24227e-12	7.82228e-11
57613	FAM234B	family with sequence similarity 234 member B	6.65114	6.60664	6.65017	7.83136	7.82527	7.86902	2.30681	1.2059	2.30681	up	5.80216e-13	1.10977e-11
7750	ZMYM2	zinc finger, MYM-type 2	6.0558	5.88454	6.14799	7.22771	7.43118	7.36128	2.48047	1.31061	2.48047	up	9.84582e-11	8.16183e-10
57619	SHROOM3	shroom family member 3	4.83244	4.84799	4.91781	3.38577	3.60089	3.42093	-2.63332	-1.39688	2.63332	down	4.44734e-10	3.04914e-09
57561	ARRDC3	arrestin domain containing 3	7.62692	7.68824	7.71547	8.90293	8.88117	9.00585	2.38354	1.25311	2.38354	up	1.34339e-13	3.43379e-12
1138	CHRNA5	cholinergic receptor, nicotinic alpha 5	6.05477	5.87315	5.90718	4.6686	4.5984	4.61376	-2.4934	-1.31811	2.4934	down	1.63061e-10	1.27312e-09
983	CDK1	cyclin-dependent kinase 1	5.59812	5.17699	5.36325	3.65291	3.73025	3.4086	-3.4395	-1.7822	3.4395	down	5.19931e-10	3.48546e-09
147991	DPY19L3	dpy-19-like 3 (C. elegans)	6.45121	6.43424	6.33455	5.36468	5.06187	5.3322	-2.22491	-1.15375	2.22491	down	2.80106e-09	1.53587e-08
5984	RFC4	replication factor C subunit 4	10.237	10.3645	10.3564	8.28942	8.27492	8.30129	-4.08615	-2.03074	4.08615	down	2.72308e-17	4.83131e-15
3162	HMOX1	heme oxygenase 1	8.72231	8.77671	8.78692	10.974	11.0239	11.0377	4.75638	2.24986	4.75638	up	6.11375e-19	4.04794e-16
1291	COL6A1	collagen, type VI, alpha 1	6.48348	6.83428	6.77792	7.7983	7.97079	7.92598	2.29707	1.1998	2.29707	up	6.80477e-10	4.41381e-09
157506	RDH10	retinol dehydrogenase 10 (all-trans)	6.85703	6.79829	6.82474	5.4715	5.46787	5.4715	-2.56045	-1.3564	2.56045	down	4.04582e-12	5.49106e-11
1390	CREM	cAMP responsive element modulator	4.40535	4.44733	4.42218	5.54602	5.61655	5.56213	2.21906	1.14995	2.21906	up	5.74567e-10	3.80104e-09
7468	WHSC1	Wolf-Hirschhorn syndrome candidate 1	6.70963	6.70663	6.64603	5.43482	5.37936	5.90052	-2.16725	-1.11586	2.16725	down	8.91978e-08	3.40517e-07
3576	CXCL8	chemokine (C-X-C motif) ligand 8	6.56541	6.43748	6.41	8.54958	8.5704	8.45341	4.15112	2.0535	4.15112	up	3.0013e-15	1.69082e-13
874	CBR3	carbonyl reductase 3	8.49125	8.50965	8.50751	7.34214	7.18752	7.15686	-2.41825	-1.27396	2.41825	down	6.93917e-13	1.28889e-11
4752	NEK3	NIMA-related kinase 3	4.62509	4.80183	4.76797	3.71079	3.77308	3.6129	-2.04586	-1.03271	2.04586	down	1.94931e-08	8.6267e-08
63874	ABHD4	abhydrolase domain containing 4	5.59187	5.54854	5.54544	4.57211	4.30091	4.60454	-2.0986	-1.06943	2.0986	down	1.59917e-08	7.23389e-08
84230	LRRC8C	leucine-rich repeat containing 8 family member C	6.31122	5.90776	5.9987	4.69082	4.74966	4.65213	-2.59372	-1.37502	2.59372	down	1.71772e-09	1.0039e-08
347240	KIF24	kinesin family member 24	6.03672	5.93389	5.81394	4.82324	4.71933	4.86536	-2.18183	-1.12554	2.18183	down	2.29142e-09	1.29201e-08
284129	SLC26A11	solute carrier family 26 (anion exchanger), member 11	6.10928	6.07724	6.17047	7.59023	7.6828	7.6301	2.85874	1.51538	2.85874	up	2.00016e-13	4.74449e-12
9976	CLEC2B	C-type lectin domain family 2, member B	8.91002	8.81799	8.75819	9.8357	9.87398	9.91186	2.06353	1.04511	2.06353	up	4.77389e-13	9.4921e-12
3014	H2AFX	H2A histone family member X	10.7799	10.8122	10.8225	9.22856	9.25515	9.24301	-2.95388	-1.56261	2.95388	down	1.9686e-17	3.80241e-15
203547	VMA21	VMA21 vacuolar H+-ATPase homolog (S. cerevisiae)	5.62354	5.52698	5.68246	3.96194	3.95008	4.01994	-3.10302	-1.63367	3.10302	down	1.48259e-11	1.61523e-10
8515	ITGA10	integrin alpha 10	7.11527	6.96839	7.01349	8.45479	8.53726	8.56788	2.80421	1.48759	2.80421	up	8.26279e-14	2.30266e-12
9824	ARHGAP11A	Rho GTPase activating protein 11A	6.26902	6.20886	6.26284	4.04368	4.06503	3.79495	-4.85348	-2.27902	4.85348	down	5.38871e-13	1.04496e-11
9444	QKI	QKI, KH domain containing, RNA binding	6.97393	6.8973	7.07424	5.76815	5.73343	5.7854	-2.32865	-1.2195	2.32865	down	3.21869e-11	3.1037e-10
55650	PIGV	phosphatidylinositol glycan anchor biosynthesis class V	7.29497	7.09314	7.09606	6.0083	6.29452	5.99521	-2.08789	-1.06205	2.08789	down	6.20248e-09	3.10996e-08
3619	INCENP	inner centromere protein	6.96926	6.95402	7.03638	5.63491	5.71198	5.84632	-2.38747	-1.25548	2.38747	down	4.67701e-11	4.29467e-10
8623	ASMTL	acetylserotonin O-methyltransferase-like	6.70505	6.578	6.8562	7.90876	7.92364	7.89904	2.29325	1.1974	2.29325	up	3.15429e-11	3.05458e-10
146956	EME1	essential meiotic structure-specific endonuclease 1	7.57276	7.55471	7.64005	6.49944	6.51049	6.65355	-2.04866	-1.03468	2.04866	down	5.39155e-11	4.86206e-10
27250	PDCD4	programmed cell death 4 (neoplastic transformation inhibitor)	7.46474	7.48679	7.39291	8.9065	8.83539	8.8821	2.68797	1.42652	2.68797	up	1.11627e-14	4.7013e-13
9656	MDC1	mediator of DNA damage checkpoint 1	6.6499	6.88665	6.8345	5.71024	5.76646	5.8089	-2.03988	-1.02848	2.03988	down	1.34922e-09	8.09159e-09
10527	IPO7	importin 7	9.28362	9.23249	9.18119	8.10983	8.05103	8.01652	-2.25528	-1.17331	2.25528	down	9.40408e-14	2.56778e-12
26586	CKAP2	cytoskeleton associated protein 2	8.58234	8.39397	8.3286	6.92138	6.82216	6.82831	-2.98491	-1.57769	2.98491	down	5.63033e-13	1.08431e-11
55011	PIH1D1	PIH1 domain containing 1	7.51954	7.53116	7.61587	6.46845	6.57412	6.61084	-2.00609	-1.00439	2.00609	down	6.51008e-11	5.70414e-10
57082	CASC5	cancer susceptibility candidate 5	9.64518	9.551	9.64236	6.78917	6.73693	6.91029	-6.96786	-2.80072	6.96786	down	1.22852e-17	2.72147e-15
10402	ST3GAL6	ST3 beta-galactoside alpha-2,3-sialyltransferase 6	5.16475	5.00941	5.13895	6.09991	6.28915	5.99182	2.03156	1.02259	2.03156	up	1.47006e-08	6.70555e-08
56650	CLDND1	claudin domain containing 1	10.8463	10.8274	10.8883	9.04894	9.05149	9.0862	-3.46239	-1.79177	3.46239	down	6.15865e-18	1.75559e-15
84870	RSPO3	R-spondin 3	5.25362	5.18787	5.02712	8.17633	8.18119	8.12696	8.02939	3.00529	8.02939	up	2.43742e-16	2.42051e-14
55166	CENPQ	centromere protein Q	8.73593	8.60938	8.47372	7.17685	7.30787	7.37535	-2.49606	-1.31965	2.49606	down	1.31671e-11	1.46504e-10
22823	MTF2	metal response element binding transcription factor 2	6.135	6.06627	6.20593	7.48995	7.53182	7.60539	2.65121	1.40665	2.65121	up	1.36178e-12	2.22852e-11
1111	CHEK1	checkpoint kinase 1	8.47087	8.38552	8.39283	7.25898	7.37861	7.32495	-2.13696	-1.09556	2.13696	down	1.54037e-12	2.46521e-11
4668	NAGA	N-acetylgalactosaminidase, alpha-	7.55614	7.59799	7.63611	5.98572	5.89251	6.11566	-3.02888	-1.59878	3.02888	down	7.92365e-13	1.43173e-11
2013	EMP2	epithelial membrane protein 2	8.84428	8.91324	8.85465	7.53766	7.59192	7.58427	-2.46133	-1.29944	2.46133	down	1.83326e-14	6.89184e-13
192670	AGO4	argonaute 4, RISC catalytic component	3.87381	3.5425	3.79842	5.23393	4.91637	5.07453	2.52573	1.3367	2.52573	up	8.79249e-09	4.23999e-08
8503	PIK3R3	phosphoinositide-3-kinase regulatory subunit 3	5.8136	5.48808	5.78776	6.77965	6.7699	6.93227	2.18979	1.13079	2.18979	up	4.27816e-09	2.242e-08
6509	SLC1A4	solute carrier family 1 (glutamate/neutral amino acid transporter), member 4	6.20601	6.23734	6.29804	4.59933	4.59365	4.43401	-3.25984	-1.7048	3.25984	down	4.81185e-12	6.32069e-11
9768	KIAA0101	KIAA0101	10.1925	10.2783	10.054	8.64999	8.68405	8.69056	-2.82857	-1.50007	2.82857	down	3.04693e-14	1.03887e-12
6535	SLC6A8	solute carrier family 6 (neurotransmitter transporter), member 8	8.04113	8.07919	8.12785	9.39062	9.4602	9.36826	2.50296	1.32364	2.50296	up	1.1824e-14	4.9112e-13
5069	PAPPA	pregnancy-associated plasma protein A, pappalysin 1	6.51869	6.58953	6.55953	7.52906	7.60414	7.58522	2.02355	1.01689	2.02355	up	1.50882e-11	1.64016e-10
221468	TMEM217	transmembrane protein 217	3.84288	4.06503	4.09532	5.42399	5.52043	5.06061	2.52089	1.33393	2.52089	up	2.3178e-08	1.0071e-07
157695	TDRP	testis development related protein	5.49019	5.2044	5.52468	6.42981	6.38433	6.52413	2.05575	1.03967	2.05575	up	1.30249e-08	6.00408e-08
170692	ADAMTS18	ADAM metallopeptidase with thrombospondin type 1 motif 18	6.34346	6.21963	6.3067	5.15565	5.29517	5.35546	-2.02956	-1.02117	2.02956	down	2.7058e-09	1.49178e-08
202052	DNAJC18	DnaJ heat shock protein family (Hsp40) member C18	5.48116	5.24293	5.88112	6.57716	6.54111	6.76844	2.1344	1.09383	2.1344	up	5.51561e-07	1.80931e-06
387119	CEP85L	centrosomal protein 85kDa-like	4.56511	4.26568	4.10385	5.89793	6.01586	6.05834	3.20242	1.67916	3.20242	up	3.99435e-10	2.77103e-09
10365	KLF2	Kruppel-like factor 2	9.15003	9.12842	9.19846	7.93723	7.88663	7.99205	-2.33001	-1.22033	2.33001	down	4.72166e-14	1.47402e-12
1979	EIF4EBP2	eukaryotic translation initiation factor 4E binding protein 2	7.49265	7.48751	7.48809	8.53217	8.55055	8.5237	2.06488	1.04606	2.06488	up	2.28302e-13	5.27193e-12
7277	TUBA4A	tubulin, alpha 4a	11.1509	11.2789	11.1651	10.0719	10.0423	10.1198	-2.17386	-1.12026	2.17386	down	4.51094e-14	1.42182e-12
8434	RECK	reversion-inducing-cysteine-rich protein with kazal motifs	5.60234	5.61152	5.56007	7.16838	7.01163	7.14939	2.86491	1.51849	2.86491	up	1.74293e-12	2.72485e-11
1362	CPD	carboxypeptidase D	8.61704	8.55246	8.59694	7.46538	7.44324	7.46557	-2.18973	-1.13075	2.18973	down	1.26471e-13	3.27538e-12
221656	KDM1B	lysine (K)-specific demethylase 1B	7.55065	7.55311	7.55516	6.30676	6.19247	6.19824	-2.4975	-1.32048	2.4975	down	1.12479e-12	1.91586e-11
10765	KDM5B	lysine (K)-specific demethylase 5B	6.52682	6.46396	6.39125	7.64434	7.54974	7.63116	2.21566	1.14774	2.21566	up	9.58344e-12	1.12236e-10
25837	RAB26	RAB26, member RAS oncogene family	4.37242	4.2848	4.4277	5.79535	5.87838	5.74498	2.72187	1.4446	2.72187	up	6.15523e-11	5.44309e-10
83877	TM2D2	TM2 domain containing 2	6.69353	6.59972	6.73345	5.63447	5.40847	5.37188	-2.30371	-1.20396	2.30371	down	5.80213e-10	3.83128e-09
10866	HCP5	HLA complex P5 (non-protein coding)	3.40801	3.64569	3.51084	4.72778	4.70546	4.72778	2.29553	1.19883	2.29553	up	3.01367e-09	1.64325e-08
9991	PTBP3	polypyrimidine tract binding protein 3	5.69679	5.61449	5.84758	7.79168	7.82819	7.8326	4.28077	2.09787	4.28077	up	2.37252e-14	8.49557e-13
9918	NCAPD2	non-SMC condensin I complex subunit D2	8.91529	8.98973	8.90893	6.71393	6.78837	6.80387	-4.49793	-2.16926	4.49793	down	1.02933e-16	1.28127e-14
3658	IREB2	iron responsive element binding protein 2	6.71748	6.69167	6.80691	7.94543	7.86742	7.80052	2.19229	1.13244	2.19229	up	8.44154e-12	1.00728e-10
126298	IRGQ	immunity-related GTPase family, Q	5.15498	4.94664	5.0999	6.22983	5.98192	6.11753	2.05992	1.04259	2.05992	up	9.7066e-09	4.62281e-08
10169	SERF2	small EDRK-rich factor 2	9.34758	9.39271	9.37854	8.20943	8.21877	8.16593	-2.25777	-1.1749	2.25777	down	1.25356e-14	5.1522e-13
6322	SCML1	sex comb on midleg-like 1 (Drosophila)	7.95674	7.9313	7.60572	6.16552	6.08335	5.91694	-3.42471	-1.77598	3.42471	down	1.64192e-11	1.75943e-10
54	ACP5	acid phosphatase 5, tartrate resistant	7.52561	7.57742	7.55167	8.56651	8.52492	8.56694	2.0017	1.00122	2.0017	up	5.91025e-13	1.12612e-11
2200	FBN1	fibrillin 1	5.63925	5.55356	5.63306	6.60027	6.62502	6.76866	2.0792	1.05603	2.0792	up	5.00402e-10	3.37264e-09
10966	RAB40B	RAB40B, member RAS oncogene family	5.43861	5.24641	5.46065	6.54549	6.59545	6.57366	2.28096	1.18964	2.28096	up	2.55348e-10	1.87746e-09
54892	NCAPG2	non-SMC condensin II complex subunit G2	9.07635	9.09534	8.77274	6.70413	6.86543	6.77114	-4.59875	-2.20124	4.59875	down	8.27012e-14	2.30306e-12
221981	THSD7A	thrombospondin type 1 domain containing 7A	3.64569	3.24234	3.76167	4.88108	4.8436	4.91716	2.51527	1.33071	2.51527	up	2.74118e-08	1.17254e-07
1786	DNMT1	DNA (cytosine-5-)-methyltransferase 1	10.2862	10.2983	10.3105	9.08729	9.07022	9.09428	-2.3205	-1.21444	2.3205	down	7.20434e-16	5.51723e-14
29893	PSMC3IP	PSMC3 interacting protein	8.30384	8.2848	8.2848	6.76197	6.76415	6.86262	-2.81845	-1.4949	2.81845	down	2.5829e-14	9.13214e-13
10196	PRMT3	protein arginine methyltransferase 3	7.07941	7.03832	7.08231	5.6042	5.56974	5.50823	-2.84013	-1.50596	2.84013	down	8.9645e-13	1.59265e-11
83549	UCK1	uridine-cytidine kinase 1	7.56738	7.62222	7.61375	6.41287	6.49779	6.47632	-2.20196	-1.13879	2.20196	down	3.78393e-12	5.20042e-11
140735	DYNLL2	dynein, light chain, LC8-type 2	5.89536	5.99232	5.9703	7.08669	7.01006	6.91985	2.07466	1.05287	2.07466	up	1.94727e-10	1.48315e-09
26521	TIMM8B	translocase of inner mitochondrial membrane 8 homolog B (yeast)	6.11176	6.41846	6.248	7.2601	7.31334	7.30504	2.04687	1.03342	2.04687	up	1.10029e-09	6.74102e-09
79694	MANEA	mannosidase, endo-alpha	7.70472	7.61285	7.58043	5.67642	5.80437	5.7665	-3.68987	-1.88357	3.68987	down	4.27181e-14	1.35736e-12
221091	LRRN4CL	LRRN4 C-terminal like	4.73669	4.6774	4.87485	6.45283	6.42578	6.64008	3.34789	1.74325	3.34789	up	8.93927e-12	1.05702e-10
4323	MMP14	matrix metallopeptidase 14 (membrane-inserted)	10.3148	10.2478	10.2974	11.558	11.6254	11.563	2.45459	1.29548	2.45459	up	4.66152e-16	3.98209e-14
835	CASP2	caspase 2	9.46161	9.53372	9.4356	8.34955	8.4236	8.43298	-2.10662	-1.07493	2.10662	down	1.74514e-13	4.24222e-12
643650	LINC00842	long intergenic non-protein coding RNA 842	5.33445	5.69956	5.45618	4.24644	4.29303	4.79653	-2.07254	-1.0514	2.07254	down	2.15265e-06	6.31968e-06
23608	MKRN1	makorin ring finger protein 1	7.0592	6.8628	7.21305	5.89869	5.95337	6.00718	-2.1316	-1.09194	2.1316	down	2.42756e-09	1.35856e-08
1719	DHFR	dihydrofolate reductase	9.42667	9.65976	9.30044	7.27956	7.18249	7.25533	-4.66916	-2.22316	4.66916	down	3.16821e-14	1.07276e-12
6839	SUV39H1	suppressor of variegation 3-9 homolog 1	6.52418	6.53736	6.64384	5.43861	5.70008	5.51595	-2.02358	-1.01691	2.02358	down	3.90916e-09	2.06797e-08
246126	TXLNGY	taxilin gamma pseudogene, Y-linked	5.5364	5.17533	5.22381	6.4854	6.44103	6.28801	2.13312	1.09297	2.13312	up	2.04686e-08	9.00961e-08
80055	PGAP1	post-GPI attachment to proteins 1	5.70368	5.49228	5.7419	6.71581	6.70038	6.76483	2.11558	1.08105	2.11558	up	9.96458e-10	6.17432e-09
217	ALDH2	aldehyde dehydrogenase 2 family (mitochondrial)	6.19891	6.20296	6.26664	7.70829	7.70494	7.5634	2.70577	1.43604	2.70577	up	7.90024e-13	1.42816e-11
54813	KLHL28	kelch like family member 28	4.7809	4.80617	4.35161	5.9471	6.28915	6.01391	2.70787	1.43716	2.70787	up	1.44612e-08	6.60714e-08
25994	HIGD1A	HIG1 hypoxia inducible domain family member 1A	6.28437	6.33607	6.31393	4.80417	5.16042	5.10767	-2.44083	-1.28737	2.44083	down	1.43361e-09	8.52988e-09
282679	AQP11	aquaporin 11	5.27776	5.31837	5.30442	6.56955	6.39484	6.62336	2.34415	1.22907	2.34415	up	1.94689e-10	1.48315e-09
7027	TFDP1	transcription factor Dp-1	10.0144	9.96215	10.0472	8.95997	9.04523	8.98215	-2.01689	-1.01213	2.01689	down	1.14554e-13	3.02763e-12
113115	MTFR2	mitochondrial fission regulator 2	7.06949	7.05294	7.18429	4.78675	4.6549	4.77506	-5.14559	-2.36334	5.14559	down	1.97483e-14	7.34658e-13
771	CA12	carbonic anhydrase XII	8.36281	8.37584	8.47005	9.59693	9.67961	9.57421	2.31983	1.21402	2.31983	up	6.92604e-14	2.00273e-12
196740	VSTM4	V-set and transmembrane domain containing 4	6.94399	6.879	7.09314	5.52464	5.31642	5.52464	-2.86158	-1.51681	2.86158	down	2.6442e-11	2.63145e-10
4088	SMAD3	SMAD family member 3	8.32347	8.12431	8.27059	6.74054	6.7685	6.5577	-2.92927	-1.55054	2.92927	down	1.61568e-12	2.56171e-11
1278	COL1A2	collagen, type I, alpha 2	11.5442	11.5485	11.6154	12.5937	12.5819	12.5762	2.02027	1.01455	2.02027	up	2.70858e-15	1.55952e-13
65125	WNK1	WNK lysine deficient protein kinase 1	8.32448	8.32821	8.26132	6.97594	7.06921	7.0395	-2.42243	-1.27645	2.42243	down	1.6534e-13	4.05965e-12
51094	ADIPOR1	adiponectin receptor 1	9.73453	9.73061	9.66549	8.19102	8.17687	8.33587	-2.78104	-1.47562	2.78104	down	1.52296e-14	5.95368e-13
8438	RAD54L	RAD54-like (S. cerevisiae)	7.50174	7.34757	7.51907	5.56469	5.44234	5.29803	-4.05895	-2.02111	4.05895	down	4.0032e-13	8.31825e-12
3656	IRAK2	interleukin 1 receptor associated kinase 2	7.01402	6.94109	6.88966	8.34214	8.35477	8.23679	2.57215	1.36298	2.57215	up	2.78893e-13	6.20273e-12
54858	PGPEP1	pyroglutamyl-peptidase I	7.14148	7.27633	7.12306	8.37045	8.34769	8.34187	2.25487	1.17305	2.25487	up	1.1907e-12	2.00979e-11
164832	LONRF2	LON peptidase N-terminal domain and ring finger 2	3.82451	3.57105	4.15717	5.34972	5.7428	5.60593	3.28351	1.71524	3.28351	up	6.52288e-09	3.25025e-08
27436	EML4	echinoderm microtubule associated protein like 4	7.72836	7.80344	7.80929	6.17587	6.51557	6.4188	-2.65789	-1.41028	2.65789	down	3.34586e-11	3.20997e-10
6533	SLC6A6	solute carrier family 6 (neurotransmitter transporter), member 6	5.13959	4.80556	4.93556	6.09149	6.17333	6.2259	2.30272	1.20334	2.30272	up	2.69099e-09	1.4859e-08
51230	PHF20	PHD finger protein 20	7.91698	7.90209	7.72267	6.59305	6.52667	6.60392	-2.41613	-1.2727	2.41613	down	5.75813e-12	7.31141e-11
126272	EID2B	EP300 interacting inhibitor of differentiation 2B	5.61412	5.60167	5.68128	6.69724	6.77068	6.84491	2.20165	1.13859	2.20165	up	1.00209e-10	8.2877e-10
377677	CA13	carbonic anhydrase XIII	6.9465	6.77385	6.8098	5.61483	5.71045	5.83089	-2.1805	-1.12466	2.1805	down	5.47399e-10	3.64654e-09
414328	IDNK	idnK, gluconokinase homolog (E. coli)	5.27649	5.2667	5.39651	3.99256	3.93344	4.27797	-2.37059	-1.24524	2.37059	down	6.83525e-09	3.38525e-08
2289	FKBP5	FK506 binding protein 5	6.28602	6.25107	6.51632	5.20611	5.25292	5.56354	-2.0143	-1.01028	2.0143	down	9.94927e-08	3.76664e-07
27253	PCDH17	protocadherin 17	4.86772	4.42807	4.70152	6.10715	6.23452	5.97826	2.71485	1.44087	2.71485	up	2.89103e-09	1.58099e-08
57234	LINC00869	long intergenic non-protein coding RNA 869	9.19863	9.10468	9.16572	8.2578	8.074	8.13224	-2.00231	-1.00166	2.00231	down	7.01195e-12	8.61337e-11
56063	TMEM234	transmembrane protein 234	6.83152	7.00228	6.95655	8.418	8.42444	8.49428	2.85889	1.51546	2.85889	up	8.86129e-14	2.45029e-12
6400	SEL1L	sel-1 suppressor of lin-12-like (C. elegans)	7.39927	7.44269	7.5522	8.53775	8.48537	8.54059	2.0799	1.05652	2.0799	up	2.92904e-12	4.17022e-11
4192	MDK	midkine (neurite growth-promoting factor 2)	6.19862	6.24666	6.03375	7.46068	7.24613	7.24613	2.23143	1.15797	2.23143	up	4.10471e-10	2.83755e-09
83461	CDCA3	cell division cycle associated 3	8.82606	8.88083	8.83651	6.26817	6.28623	6.47924	-5.66963	-2.50325	5.66963	down	3.97505e-16	3.5104e-14
965	CD58	CD58 molecule	9.95982	9.99578	9.91954	8.93494	8.80895	8.90181	-2.10888	-1.07648	2.10888	down	1.48177e-13	3.7196e-12
1633	DCK	deoxycytidine kinase	9.23507	9.1537	9.05231	6.71868	6.70943	6.82628	-5.26183	-2.39556	5.26183	down	2.49957e-16	2.45635e-14
7982	ST7	suppression of tumorigenicity 7	7.16074	7.06648	7.13075	6.07759	6.00456	6.03072	-2.11653	-1.0817	2.11653	down	3.65149e-11	3.45749e-10
10926	DBF4	DBF4 zinc finger	7.8173	7.81014	7.85316	6.23242	6.19499	6.15425	-3.10153	-1.63298	3.10153	down	2.73404e-14	9.546e-13
51499	TRIAP1	TP53 regulated inhibitor of apoptosis 1	10.0296	10.1356	10.0826	11.1356	11.1389	11.1575	2.08702	1.06144	2.08702	up	1.11882e-14	4.70698e-13
4814	NINJ1	ninjurin 1	8.06835	8.18658	8.11989	9.40674	9.48836	9.52755	2.54784	1.34928	2.54784	up	3.08495e-14	1.05092e-12
558	AXL	AXL receptor tyrosine kinase	11.5068	11.4933	11.4244	10.3076	10.2878	10.2985	-2.26089	-1.17689	2.26089	down	1.11639e-15	7.81675e-14
5468	PPARG	peroxisome proliferator-activated receptor gamma	6.8667	6.9351	6.93491	5.20725	4.9712	4.94469	-3.65834	-1.87119	3.65834	down	1.65894e-12	2.62096e-11
908	CCT6A	chaperonin containing TCP1, subunit 6A (zeta 1)	10.4476	10.4572	10.436	8.84158	8.84284	8.95302	-2.96454	-1.56781	2.96454	down	3.33356e-16	3.03269e-14
7976	FZD3	frizzled class receptor 3	4.19534	4.19534	4.08765	5.23662	5.19707	5.41745	2.17991	1.12427	2.17991	up	5.0689e-09	2.6035e-08
55276	PGM2	phosphoglucomutase 2	5.83975	5.82138	5.78753	4.70534	4.94819	4.76059	-2.01602	-1.01151	2.01602	down	8.57247e-09	4.14306e-08
1810	DR1	down-regulator of transcription 1	7.24024	7.17589	7.35833	5.56267	5.61878	5.61825	-3.15634	-1.65825	3.15634	down	5.6543e-13	1.08786e-11
1163	CKS1B	CDC28 protein kinase regulatory subunit 1B	9.97612	10.0676	10.0558	8.65229	8.56047	8.55362	-2.72148	-1.44439	2.72148	down	2.97574e-15	1.68368e-13
26135	SERBP1	SERPINE1 mRNA binding protein 1	11.1222	11.1542	11.1267	9.97273	9.87926	9.94434	-2.30098	-1.20225	2.30098	down	1.74126e-15	1.1012e-13
100887750	MRPS31P5	mitochondrial ribosomal protein S31 pseudogene 5	4.9635	4.69571	5.21809	6.25297	6.33604	6.50397	2.64859	1.40523	2.64859	up	8.31263e-09	4.0284e-08
1870	E2F2	E2F transcription factor 2	7.45791	7.40847	7.40276	5.49343	5.53884	5.92699	-3.41045	-1.76996	3.41045	down	3.51386e-11	3.34586e-10
4684	NCAM1	neural cell adhesion molecule 1	7.15862	7.04591	7.09494	5.6458	5.73343	5.90259	-2.53014	-1.33922	2.53014	down	4.32669e-11	4.01823e-10
100533483	DYX1C1-CCPG1	DYX1C1-CCPG1 readthrough (NMD candidate)	5.61577	5.71174	5.53162	6.92234	6.80394	6.78472	2.3251	1.21729	2.3251	up	9.83686e-11	8.15643e-10
10144	FAM13A	family with sequence similarity 13 member A	6.58053	6.53531	6.61028	7.66248	7.75389	7.68154	2.1794	1.12393	2.1794	up	4.14421e-12	5.6001e-11
961	CD47	CD47 molecule	9.54897	9.47418	9.42062	7.97869	8.06359	7.94839	-2.79794	-1.48437	2.79794	down	1.08828e-14	4.62282e-13
3145	HMBS	hydroxymethylbilane synthase	8.01342	8.00971	8.11675	6.88277	6.85367	6.89525	-2.24918	-1.1694	2.24918	down	1.07232e-12	1.84491e-11
6781	STC1	stanniocalcin 1	10.139	10.0208	10.1551	7.71928	7.71678	7.72041	-5.22759	-2.38615	5.22759	down	5.53832e-18	1.68339e-15
5583	PRKCH	protein kinase C, eta	6.56935	6.46868	6.52555	4.96755	4.80549	4.89377	-3.09998	-1.63226	3.09998	down	3.74308e-12	5.15149e-11
6150	MRPL23	mitochondrial ribosomal protein L23	10.3079	10.3255	10.3897	9.21126	9.28169	9.23479	-2.14127	-1.09847	2.14127	down	1.82895e-14	6.88227e-13
55711	FAR2	fatty acyl-CoA reductase 2	6.87078	6.87931	6.90043	5.08331	5.06798	5.32864	-3.30243	-1.72353	3.30243	down	4.13525e-12	5.59514e-11
7171	TPM4	tropomyosin 4	9.00292	9.08568	8.8042	7.457	7.51816	7.46909	-2.795	-1.48285	2.795	down	8.30994e-13	1.49465e-11
5558	PRIM2	primase, DNA, polypeptide 2 (58kDa)	7.74339	7.58047	7.58842	6.50882	6.41259	6.47436	-2.2535	-1.17217	2.2535	down	1.46094e-11	1.59684e-10
63901	FAM111A	family with sequence similarity 111 member A	7.9566	7.99726	8.00851	6.36262	6.29864	6.21525	-3.23841	-1.69529	3.23841	down	3.19116e-14	1.07867e-12
7866	IFRD2	interferon-related developmental regulator 2	9.23311	9.33016	9.28151	8.09421	8.18792	8.14023	-2.20504	-1.14081	2.20504	down	1.07639e-13	2.89076e-12
51317	PHF21A	PHD finger protein 21A	6.08236	5.99416	6.21675	7.3209	7.43872	7.33483	2.40671	1.26706	2.40671	up	2.95105e-11	2.88699e-10
3487	IGFBP4	insulin like growth factor binding protein 4	7.38674	7.50362	7.63434	8.724	8.78307	8.71709	2.3508	1.23315	2.3508	up	3.60666e-12	4.99179e-11
55559	HAUS7	HAUS augmin like complex subunit 7	7.05906	7.04716	7.1879	5.42416	5.15089	5.25035	-3.53793	-1.82291	3.53793	down	2.14223e-12	3.21827e-11
64946	CENPH	centromere protein H	8.61009	8.58947	8.4287	7.0527	6.88543	6.98479	-2.96585	-1.56845	2.96585	down	2.63139e-13	5.9263e-12
389136	VGLL3	vestigial like family member 3	7.11412	7.1758	7.11131	4.11874	4.61616	4.5582	-6.51024	-2.70271	6.51024	down	9.36726e-13	1.65371e-11
157753	TMEM74	transmembrane protein 74	5.17399	4.87413	4.83623	3.9027	3.52359	3.71257	-2.37594	-1.2485	2.37594	down	4.42048e-08	1.80549e-07
162681	C18orf54	chromosome 18 open reading frame 54	5.79176	5.87426	6.03014	3.4716	3.75437	3.56642	-4.92887	-2.30126	4.92887	down	1.74173e-12	2.72485e-11
200315	APOBEC3A	apolipoprotein B mRNA editing enzyme, catalytic polypeptide-like 3A	8.98244	9.02645	9.05138	6.37065	6.74229	6.76715	-5.25392	-2.39339	5.25392	down	9.87451e-14	2.68316e-12
10163	WASF2	WAS protein family member 2	7.09812	7.07552	7.20329	5.32324	5.24702	5.63967	-3.2997	-1.72233	3.2997	down	3.32965e-11	3.19676e-10
8509	NDST2	N-deacetylase/N-sulfotransferase (heparan glucosaminyl) 2	5.67279	5.42879	5.70731	6.73224	6.69082	6.59879	2.10087	1.07099	2.10087	up	3.05942e-09	1.66565e-08
57546	PDP2	pyruvate dehyrogenase phosphatase catalytic subunit 2	6.38866	6.33674	6.33784	7.39296	7.42931	7.42492	2.08684	1.06132	2.08684	up	1.03758e-11	1.2001e-10
352909	DNAAF3	dynein, axonemal, assembly factor 3	6.50741	6.60527	6.63039	4.14295	4.49313	4.16221	-4.97579	-2.31493	4.97579	down	1.37003e-12	2.23804e-11
25937	WWTR1	WW domain containing transcription regulator 1	9.54816	9.57066	9.41025	7.43572	7.29911	7.22562	-4.5616	-2.18954	4.5616	down	1.98456e-15	1.22736e-13
4172	MCM3	minichromosome maintenance complex component 3	10.6603	10.7309	10.7341	8.48466	8.48635	8.4338	-4.72461	-2.2402	4.72461	down	1.16909e-18	6.292e-16
79866	BORA	bora, aurora kinase A activator	8.01714	8.10409	8.10049	5.58071	5.42331	5.43668	-6.03634	-2.59367	6.03634	down	6.21082e-16	4.89993e-14
1284	COL4A2	collagen, type IV, alpha 2	5.56061	5.56061	5.66873	4.27229	4.73109	4.63814	-2.06978	-1.04948	2.06978	down	1.60347e-07	5.82149e-07
1500	CTNND1	catenin delta 1	8.21322	8.13905	8.05579	7.10985	7.12873	7.14945	-2.00928	-1.00668	2.00928	down	1.01813e-11	1.1797e-10
104355135	LINC00431	long intergenic non-protein coding RNA 431	8.02267	7.97219	8.03684	6.4867	6.68876	6.67814	-2.6257	-1.3927	2.6257	down	1.59882e-12	2.53907e-11
64061	TSPYL2	TSPY-like 2	5.14793	5.16475	5.32885	6.46092	6.67103	6.66706	2.61322	1.38583	2.61322	up	1.19927e-10	9.68355e-10
28973	MRPS18B	mitochondrial ribosomal protein S18B	9.68551	9.843	9.69056	8.04344	7.91659	7.89577	-3.45278	-1.78776	3.45278	down	6.55463e-15	3.08528e-13
3702	ITK	IL2-inducible T-cell kinase	5.57569	5.41379	5.37422	3.89575	3.3087	3.83693	-3.42026	-1.77411	3.42026	down	3.16099e-09	1.71262e-08
540	ATP7B	ATPase, Cu++ transporting, beta polypeptide	3.73475	3.76526	3.95849	4.83007	4.96251	5.13095	2.22686	1.15501	2.22686	up	1.95882e-08	8.66291e-08
4149	MAX	MYC associated factor X	8.51515	8.42441	8.47638	6.69613	6.638	6.56211	-3.57985	-1.8399	3.57985	down	3.99588e-15	2.067e-13
10413	YAP1	Yes associated protein 1	7.15225	7.2419	7.26699	8.33531	8.36313	8.36065	2.19261	1.13265	2.19261	up	6.32711e-13	1.19158e-11
57149	LYRM1	LYR motif containing 1	7.66362	7.59638	7.39737	5.78899	5.76566	5.92887	-3.30492	-1.72462	3.30492	down	2.18617e-12	3.27299e-11
4644	MYO5A	myosin VA	8.03454	8.07762	7.7629	6.39921	6.36065	6.34939	-3.00758	-1.5886	3.00758	down	4.30966e-12	5.77123e-11
6161	RPL32	ribosomal protein L32	7.0394	7.12368	7.09233	5.69075	5.39927	5.65841	-2.83299	-1.50233	2.83299	down	2.64669e-11	2.63326e-10
58493	INIP	INTS3 and NABP interacting protein	7.96946	8.19732	8.06488	7.02216	7.07152	6.84798	-2.1386	-1.09667	2.1386	down	2.23561e-10	1.67159e-09
728833	FAM72D	family with sequence similarity 72 member D	7.22947	7.35694	7.43963	5.1171	5.18689	5.12881	-4.58762	-2.19775	4.58762	down	3.28709e-14	1.10254e-12
9465	AKAP7	A-kinase anchoring protein 7	6.5025	6.38506	5.96162	4.73314	5.2546	5.10226	-2.38346	-1.25306	2.38346	down	4.4365e-07	1.48034e-06
132671	SPATA18	spermatogenesis associated 18	4.22499	4.14299	4.15014	5.59077	5.66873	5.63526	2.74895	1.45888	2.74895	up	3.70998e-11	3.5061e-10
1486	CTBS	chitobiase, di-N-acetyl-	5.68284	5.59896	5.7394	4.21152	4.4528	4.2948	-2.55625	-1.35403	2.55625	down	4.21338e-10	2.90294e-09
91056	AP5B1	adaptor-related protein complex 5, beta 1 subunit	7.14817	7.20658	7.05249	8.22234	8.15036	8.29163	2.1224	1.0857	2.1224	up	1.07982e-11	1.24127e-10
80705	TSGA10	testis specific 10	4.57211	4.74723	4.7656	5.84316	5.73587	5.67634	2.08033	1.05681	2.08033	up	6.50457e-09	3.24195e-08
9895	TECPR2	tectonin beta-propeller repeat containing 2	6.44706	6.53145	6.62068	7.5099	7.55742	7.59883	2.03118	1.02232	2.03118	up	6.89349e-11	5.99321e-10
10057	ABCC5	ATP binding cassette subfamily C member 5	7.66062	7.61157	7.74582	9.0958	9.10295	9.14595	2.71741	1.44223	2.71741	up	1.13879e-14	4.78073e-13
5534	PPP3R1	protein phosphatase 3 regulatory subunit B, alpha	7.46233	7.73665	7.36218	6.23625	6.3235	6.28627	-2.35933	-1.23838	2.35933	down	4.84333e-10	3.27991e-09
9397	NMT2	N-myristoyltransferase 2	5.49707	5.4938	5.59081	4.21241	4.76416	4.41272	-2.09091	-1.06413	2.09091	down	3.39579e-07	1.15711e-06
80311	KLHL15	kelch like family member 15	6.30521	6.36797	6.30444	7.91522	8.02903	7.94722	3.11223	1.63795	3.11223	up	3.50401e-14	1.15165e-12
11098	PRSS23	protease, serine 23	9.41149	9.49829	9.41898	7.75324	7.67877	7.68762	-3.33197	-1.73638	3.33197	down	3.78165e-16	3.36233e-14
81669	CCNL2	cyclin L2	6.39784	6.40745	6.39743	7.85843	8.02091	7.92742	2.89724	1.53468	2.89724	up	1.25214e-13	3.25141e-12
642477	LINC01296	long intergenic non-protein coding RNA 1296	7.18027	7.18098	7.17923	8.06661	8.29033	8.19247	2.00413	1.00298	2.00413	up	4.34166e-11	4.03022e-10
100507420	LINC01605	long intergenic non-protein coding RNA 1605	5.90779	5.81684	5.99134	4.63024	4.57211	4.74817	-2.38692	-1.25515	2.38692	down	5.1468e-10	3.4544e-09
55105	GPATCH2	G-patch domain containing 2	5.18926	5.17779	5.3037	6.30807	6.32902	6.34857	2.15094	1.10497	2.15094	up	3.18187e-10	2.27251e-09
9314	KLF4	Kruppel-like factor 4 (gut)	6.86312	6.76627	6.79944	5.67047	5.94514	5.72927	-2.03917	-1.02798	2.03917	down	2.46383e-09	1.37493e-08
9969	MED13	mediator complex subunit 13	5.90467	6.05279	5.96253	7.11164	7.08149	7.31677	2.29205	1.19664	2.29205	up	1.76905e-10	1.36679e-09
7153	TOP2A	topoisomerase (DNA) II alpha	11.6026	11.5682	11.6071	9.23059	9.34399	9.30804	-4.91918	-2.29842	4.91918	down	6.97366e-19	4.20673e-16
55388	MCM10	minichromosome maintenance 10 replication initiation factor	7.63313	7.54846	7.64374	4.96283	5.09089	5.20223	-5.74827	-2.52313	5.74827	down	7.56395e-15	3.44863e-13
254065	BRWD3	bromodomain and WD repeat domain containing 3	5.21705	5.19158	5.07465	6.18857	6.22951	6.34291	2.13254	1.09257	2.13254	up	1.0051e-09	6.22099e-09
128344	PIFO	primary cilia formation	6.19927	6.35304	6.25761	7.73871	7.70801	7.85886	2.82559	1.49855	2.82559	up	8.25354e-13	1.48518e-11
51196	PLCE1	phospholipase C epsilon 1	6.03706	6.11323	6.04825	4.67782	4.52046	5.01001	-2.51417	-1.33008	2.51417	down	7.18701e-09	3.53535e-08
11219	TREX2	three prime repair exonuclease 2	7.05906	7.04716	7.1879	5.42416	5.15089	5.25035	-3.53793	-1.82291	3.53793	down	2.14223e-12	3.21827e-11
7111	TMOD1	tropomodulin 1	5.52837	5.31281	5.29902	6.36833	6.60426	6.55096	2.18523	1.12778	2.18523	up	3.2067e-09	1.73475e-08
1070	CETN3	centrin 3	9.0925	8.99022	8.90478	6.43774	6.50156	6.38521	-5.87395	-2.55433	5.87395	down	1.43975e-16	1.6222e-14
196410	METTL7B	methyltransferase like 7B	8.16065	8.0953	8.23239	9.13766	9.16048	9.2596	2.03233	1.02313	2.03233	up	2.57674e-12	3.74338e-11
3340	NDST1	N-deacetylase/N-sulfotransferase (heparan glucosaminyl) 1	6.3958	6.18459	6.22849	8.25991	8.27598	8.22958	3.96008	1.98553	3.96008	up	1.25855e-14	5.15652e-13
84722	PSRC1	proline/serine-rich coiled-coil 1	8.13491	8.03934	8.13945	6.83435	6.89395	6.77927	-2.40946	-1.26871	2.40946	down	6.85818e-13	1.27627e-11
11209	MST1P2	macrophage stimulating 1 (hepatocyte growth factor-like) pseudogene 2	5.27993	5.49952	5.30424	6.41531	6.64191	6.68301	2.32761	1.21885	2.32761	up	1.54598e-09	9.12508e-09
245812	CNPY4	canopy FGF signaling regulator 4	6.13283	6.2692	6.244	7.16192	7.23439	7.25596	2.00289	1.00208	2.00289	up	1.45015e-10	1.14624e-09
27177	IL36B	interleukin 36, beta	5.29902	5.35296	5.45416	6.83212	6.77995	6.79921	2.70391	1.43505	2.70391	up	6.12168e-12	7.6933e-11
27085	MTBP	MDM2 binding protein	6.51602	6.7818	6.62789	5.49919	5.23629	5.07705	-2.58661	-1.37106	2.58661	down	2.67223e-09	1.47575e-08
10121	ACTR1A	ARP1 actin-related protein 1 homolog A, centractin alpha (yeast)	9.1862	9.27031	9.27867	8.01323	7.99077	8.07843	-2.32557	-1.21758	2.32557	down	5.44216e-14	1.65416e-12
84665	MYPN	myopalladin	6.90556	7.0351	6.88149	5.82759	5.68625	5.40182	-2.46598	-1.30216	2.46598	down	1.8746e-09	1.08395e-08
10060	ABCC9	ATP binding cassette subfamily C member 9	8.0576	8.00517	7.93444	6.96107	6.96375	6.96107	-2.05211	-1.03711	2.05211	down	4.53576e-12	6.01445e-11
286151	FBXO43	F-box protein 43	5.57877	5.36571	5.47698	3.80548	3.83628	3.91949	-3.0739	-1.62007	3.0739	down	3.83953e-11	3.61064e-10
3911	LAMA5	laminin subunit alpha 5	6.31427	5.95278	6.22917	7.23338	7.30678	7.13223	2.08309	1.05872	2.08309	up	6.72311e-09	3.33603e-08
9695	EDEM1	ER degradation enhancer, mannosidase alpha-like 1	5.13089	5.08086	5.09114	6.25718	6.09965	6.34118	2.19118	1.13171	2.19118	up	1.02584e-09	6.33434e-09
4140	MARK3	MAP/microtubule affinity-regulating kinase 3	9.44867	9.6044	9.4781	10.5712	10.6259	10.6438	2.14838	1.10325	2.14838	up	1.90003e-13	4.56256e-12
5993	RFX5	regulatory factor X5	7.58469	7.68442	7.60636	6.25603	6.28271	6.24861	-2.57167	-1.36271	2.57167	down	4.9021e-13	9.682e-12
22871	NLGN1	neuroligin 1	5.79301	5.78006	5.81098	4.28902	4.39275	4.44821	-2.67219	-1.41802	2.67219	down	5.72843e-11	5.12111e-10
54535	CCHCR1	coiled-coil alpha-helical rod protein 1	7.13631	7.29814	7.38616	6.17134	6.27236	6.21625	-2.07564	-1.05355	2.07564	down	4.16816e-10	2.87735e-09
10046	MAMLD1	mastermind like domain containing 1	7.27504	7.28728	7.24193	5.70606	5.70901	5.50365	-3.09194	-1.62851	3.09194	down	1.41636e-12	2.29865e-11
55706	NDC1	NDC1 transmembrane nucleoporin	8.85383	8.87132	8.87877	7.58764	7.53926	7.56604	-2.46854	-1.30366	2.46854	down	8.84535e-15	3.9101e-13
549	AUH	AU RNA binding protein/enoyl-CoA hydratase	6.50713	6.23609	6.51047	7.56243	7.59894	7.56063	2.22855	1.1561	2.22855	up	1.98523e-10	1.50679e-09
55108	BSDC1	BSD domain containing 1	8.9923	9.09239	9.07513	10.1538	10.1723	10.1356	2.14449	1.10063	2.14449	up	2.32599e-14	8.35948e-13
7074	TIAM1	T-cell lymphoma invasion and metastasis 1	7.79824	7.77292	7.92015	6.49209	6.6673	6.58963	-2.37418	-1.24743	2.37418	down	8.26238e-12	9.90424e-11
84102	SLC41A2	solute carrier family 41 (magnesium transporter), member 2	6.02317	5.8042	6.17354	7.3429	7.37098	7.3338	2.54722	1.34892	2.54722	up	1.37308e-10	1.09235e-09
283643	C14orf80	chromosome 14 open reading frame 80	7.49838	7.6369	7.40085	6.02212	5.88988	6.11965	-2.83136	-1.50149	2.83136	down	1.26611e-11	1.418e-10
116028	RMI2	RecQ mediated genome instability 2	8.06059	8.1073	8.23994	6.38192	6.3357	6.30748	-3.46834	-1.79424	3.46834	down	2.80543e-14	9.72599e-13
7022	TFAP2C	transcription factor AP-2 gamma (activating enhancer binding protein 2 gamma)	4.8717	5.14507	5.15615	6.26339	5.89398	6.35287	2.16211	1.11244	2.16211	up	1.56132e-07	5.68107e-07
5511	PPP1R8	protein phosphatase 1 regulatory subunit 8	6.96107	7.01646	7.05728	8.33724	8.34487	8.37663	2.53381	1.34131	2.53381	up	5.98972e-14	1.78327e-12
23306	NEMP1	nuclear envelope integral membrane protein 1	8.56381	8.57492	8.54984	6.9815	7.05748	7.02812	-2.90893	-1.54049	2.90893	down	4.48719e-15	2.27316e-13
51726	DNAJB11	DnaJ heat shock protein family (Hsp40) member B11	10.3679	10.4789	10.263	9.37757	9.32526	9.29675	-2.05158	-1.03673	2.05158	down	3.20601e-12	4.51612e-11
3612	IMPA1	inositol(myo)-1(or 4)-monophosphatase 1	8.33807	8.24918	8.31924	7.28882	7.30039	7.31081	-2.00299	-1.00216	2.00299	down	1.77571e-12	2.76841e-11
151827	LRRC34	leucine rich repeat containing 34	6.99333	6.91163	6.99877	5.65754	5.65551	5.65291	-2.48387	-1.31259	2.48387	down	5.0079e-12	6.51276e-11
23401	FRAT2	frequently rearranged in advanced T-cell lymphomas 2	5.44795	5.40909	5.26816	6.37469	6.44975	6.62258	2.15438	1.10727	2.15438	up	2.21597e-09	1.2547e-08
8479	HIRIP3	HIRA interacting protein 3	8.27608	8.40516	8.45265	7.19104	6.96472	7.11316	-2.44244	-1.28832	2.44244	down	8.87548e-12	1.05075e-10
5087	PBX1	pre-B-cell leukemia homeobox 1	5.674	5.57286	5.43801	3.59764	3.87145	3.73774	-3.54556	-1.82601	3.54556	down	3.34341e-11	3.2084e-10
2624	GATA2	GATA binding protein 2	4.36237	4.61446	4.52306	5.83918	5.90231	5.87016	2.58576	1.37059	2.58576	up	2.20422e-10	1.65064e-09
359948	IRF2BP2	interferon regulatory factor 2 binding protein 2	6.84782	6.84371	6.87536	4.99553	5.0716	4.91716	-3.63226	-1.86087	3.63226	down	2.67312e-13	5.9962e-12
5172	SLC26A4	solute carrier family 26 (anion exchanger), member 4	6.14508	5.71524	5.84926	4.39073	4.70058	4.67983	-2.48426	-1.31281	2.48426	down	1.9935e-08	8.79646e-08
8975	USP13	ubiquitin specific peptidase 13 (isopeptidase T-3)	9.13109	9.07033	9.1171	8.00669	8.03845	8.05316	-2.1044	-1.07341	2.1044	down	7.67346e-14	2.16926e-12
65057	ACD	adrenocortical dysplasia homolog (mouse)	8.28227	8.17784	8.37477	7.09755	7.1218	7.31028	-2.14615	-1.10175	2.14615	down	9.29031e-11	7.75544e-10
64388	GREM2	gremlin 2, DAN family BMP antagonist	4.09758	3.92833	4.02828	6.20124	6.29388	6.23582	4.677	2.22558	4.677	up	1.83339e-13	4.42929e-12
10460	TACC3	transforming, acidic coiled-coil containing protein 3	7.79406	7.81558	7.92517	5.92087	5.73327	5.89247	-3.98911	-1.99607	3.98911	down	4.33823e-14	1.3729e-12
4218	RAB8A	RAB8A, member RAS oncogene family	10.4846	10.499	10.5352	9.5105	9.45917	9.50124	-2.02223	-1.01595	2.02223	down	1.2351e-14	5.09771e-13
57763	ANKRA2	ankyrin repeat, family A (RFXANK-like), 2	6.46548	6.42945	6.32217	7.44849	7.40037	7.42966	2.02858	1.02047	2.02858	up	4.89343e-11	4.46732e-10
119504	ANAPC16	anaphase promoting complex subunit 16	6.9955	7.05322	7.13352	5.89245	5.82703	5.96998	-2.24118	-1.16426	2.24118	down	5.58766e-11	5.01126e-10
5521	PPP2R2B	protein phosphatase 2 regulatory subunit B, beta	6.28431	6.10865	6.26014	4.32503	4.58354	4.64253	-3.25051	-1.70067	3.25051	down	5.7169e-11	5.11313e-10
60526	LDAH	lipid droplet associated hydrolase	8.13956	8.21897	8.27085	5.64798	5.82804	5.83212	-5.42797	-2.44041	5.42797	down	2.24101e-15	1.34678e-13
534	ATP6V1G2	ATPase, H+ transporting, lysosomal 13kDa, V1 subunit G2	6.34906	6.48819	6.5286	7.76924	7.84702	7.81463	2.55799	1.35501	2.55799	up	1.63309e-12	2.58408e-11
406953	MIR18A	microRNA 18a	5.71353	5.80595	5.91176	4.63024	4.65994	4.79717	-2.16539	-1.11463	2.16539	down	2.96686e-09	1.61946e-08
129303	TMEM150A	transmembrane protein 150A	6.83211	7.10482	6.76498	8.05095	8.20643	8.26249	2.41606	1.27265	2.41606	up	2.75604e-10	2.00305e-09
9728	SECISBP2L	SECIS binding protein 2-like	4.29086	4.32475	4.23769	5.61086	5.55086	5.54626	2.43664	1.28489	2.43664	up	1.79712e-10	1.38602e-09
26959	HBP1	HMG-box transcription factor 1	7.68857	7.78981	7.78454	9.13547	9.18991	9.19853	2.67647	1.42033	2.67647	up	8.4155e-15	3.7668e-13
51633	OTUD6B	OTU domain containing 6B	7.09422	7.12928	7.13728	5.80221	5.8211	5.88353	-2.43622	-1.28465	2.43622	down	3.94683e-12	5.38092e-11
10186	LHFP	lipoma HMGIC fusion partner	9.40273	9.29584	9.34979	7.2538	7.18505	7.07185	-4.52909	-2.17922	4.52909	down	3.90141e-16	3.45315e-14
55664	CDC37L1	cell division cycle 37-like 1	7.52607	7.51221	7.54239	8.9619	8.97016	8.91978	2.68277	1.42372	2.68277	up	2.82589e-15	1.61285e-13
54492	NEURL1B	neuralized E3 ubiquitin protein ligase 1B	8.24286	8.22303	8.24675	5.79671	5.77706	5.77736	-5.47871	-2.45384	5.47871	down	7.02677e-17	9.54373e-15
6843	VAMP1	vesicle associated membrane protein 1	3.86021	4.0668	4.0457	6.08146	6.39289	6.07666	4.57181	2.19277	4.57181	up	4.88243e-12	6.38772e-11
114907	FBXO32	F-box protein 32	8.80268	8.91513	8.86945	9.98602	10.0312	10.141	2.28199	1.19029	2.28199	up	1.84856e-13	4.46043e-12
7368	UGT8	UDP glycosyltransferase 8	9.51672	9.51864	9.45508	7.64742	7.64557	7.7184	-3.54639	-1.82635	3.54639	down	1.22291e-16	1.44864e-14
57085	AGTRAP	angiotensin II receptor-associated protein	8.833	8.90662	8.93413	9.98299	9.96109	10.0084	2.13302	1.0929	2.13302	up	3.36598e-14	1.12037e-12
400073	C12orf76	chromosome 12 open reading frame 76	6.35777	6.09734	6.25604	8.52042	8.52403	8.56163	4.91881	2.29831	4.91881	up	3.45184e-15	1.85916e-13
4833	NME4	NME/NM23 nucleoside diphosphate kinase 4	8.21578	8.3601	8.39193	6.60541	6.49657	6.57775	-3.39331	-1.76269	3.39331	down	3.4684e-14	1.14282e-12
10395	DLC1	DLC1 Rho GTPase activating protein	9.60345	9.6675	9.5932	8.09618	8.09284	8.11813	-2.86592	-1.519	2.86592	down	4.47842e-16	3.85932e-14
1942	EFNA1	ephrin-A1	4.71386	4.80183	4.49264	5.90506	6.16396	5.79745	2.43859	1.28605	2.43859	up	9.8694e-09	4.69122e-08
167681	PRSS35	protease, serine 35	6.91488	6.90969	7.0341	10.0092	10.0767	10.1026	8.63335	3.10992	8.63335	up	6.11888e-19	4.04794e-16
79019	CENPM	centromere protein M	9.28159	9.28174	9.36445	7.26635	7.23467	7.24172	-4.17472	-2.06168	4.17472	down	3.70456e-17	5.88453e-15
81611	ANP32E	acidic nuclear phosphoprotein 32 family member E	8.75488	8.92241	8.53632	7.55529	7.58237	7.53874	-2.26431	-1.17907	2.26431	down	2.13706e-10	1.60819e-09
388389	CCDC103	coiled-coil domain containing 103	5.84878	5.67825	5.78667	6.84348	6.73835	6.88052	2.06988	1.04955	2.06988	up	5.1686e-10	3.46666e-09
11123	RCAN3	RCAN family member 3	4.68905	4.94031	4.97738	3.30176	3.81234	3.40475	-2.57154	-1.36263	2.57154	down	5.03892e-08	2.03142e-07
411	ARSB	arylsulfatase B	7.13345	7.09066	6.82985	4.77342	4.79303	4.82104	-4.6659	-2.22216	4.6659	down	3.241e-13	6.99778e-12
58528	RRAGD	Ras-related GTP binding D	5.74848	5.54042	5.77388	4.44092	4.50173	4.86715	-2.12039	-1.08433	2.12039	down	1.44585e-07	5.29284e-07
57728	WDR19	WD repeat domain 19	6.58009	6.51922	6.71534	7.87318	7.90785	7.95331	2.47352	1.30656	2.47352	up	2.59269e-12	3.76098e-11
23671	TMEFF2	transmembrane protein with EGF-like and two follistatin-like domains 2	7.38053	7.3098	7.48593	5.36402	5.45714	5.70316	-3.69092	-1.88398	3.69092	down	3.46426e-12	4.82363e-11
2044	EPHA5	EPH receptor A5	5.02913	5.0029	5.17288	6.12231	6.06364	6.17932	2.07549	1.05345	2.07549	up	1.89139e-09	1.09222e-08
23310	NCAPD3	non-SMC condensin II complex subunit D3	7.41776	7.43285	7.3198	5.53521	5.44193	5.63583	-3.6112	-1.85248	3.6112	down	2.07342e-13	4.88281e-12
3609	ILF3	interleukin enhancer binding factor 3	7.02781	7.09191	7.04494	5.68622	5.67424	5.6593	-2.60563	-1.38163	2.60563	down	1.75016e-12	2.73402e-11
390980	ZNF805	zinc finger protein 805	4.45939	4.50525	4.40502	6.04851	6.06433	6.11647	3.0735	1.61988	3.0735	up	5.1986e-12	6.72508e-11
4907	NT5E	5'-nucleotidase, ecto (CD73)	9.92493	9.95899	9.9366	7.95605	8.05701	8.04397	-3.78728	-1.92116	3.78728	down	3.45396e-17	5.64291e-15
84188	FAR1	fatty acyl CoA reductase 1	8.75334	8.65566	8.72898	7.64609	7.70089	7.74714	-2.02037	-1.01462	2.02037	down	1.65442e-12	2.61572e-11
55972	SLC25A40	solute carrier family 25, member 40	8.56713	8.605	8.53081	7.26868	7.46028	7.41717	-2.27458	-1.1856	2.27458	down	2.20809e-12	3.30078e-11
1879	EBF1	early B-cell factor 1	8.71474	8.85905	8.80386	7.698	7.69097	7.74065	-2.11796	-1.08268	2.11796	down	8.78479e-13	1.56691e-11
64795	RMND5A	required for meiotic nuclear division 5 homolog A	6.41441	6.50172	6.69576	9.19151	9.17866	9.18007	6.2598	2.64612	6.2598	up	4.34631e-16	3.77869e-14
6892	TAPBP	TAP binding protein (tapasin)	5.21746	5.23349	5.38648	7.03565	6.93419	7.05836	3.31787	1.73026	3.31787	up	1.0733e-12	1.8458e-11
114034	TOE1	target of EGR1, member 1 (nuclear)	7.59767	7.55795	7.636	6.34959	6.45395	6.44522	-2.26727	-1.18095	2.26727	down	4.17228e-12	5.62569e-11
4824	NKX3-1	NK3 homeobox 1	5.68111	5.77082	5.73875	4.56807	4.77229	4.55315	-2.14215	-1.09906	2.14215	down	3.67557e-09	1.95865e-08
144501	KRT80	keratin 80, type II	6.34006	6.44906	6.39624	5.15803	5.21954	5.1308	-2.33863	-1.22566	2.33863	down	7.92368e-11	6.76971e-10
10390	CEPT1	choline/ethanolamine phosphotransferase 1	8.59746	8.59059	8.49401	7.2698	7.3408	7.29408	-2.39351	-1.25913	2.39351	down	1.41738e-13	3.58552e-12
58527	ABRACL	ABRA C-terminal like	8.05198	8.11753	8.05024	6.34487	6.3075	6.27289	-3.39834	-1.76483	3.39834	down	6.57445e-15	3.08691e-13
3184	HNRNPD	heterogeneous nuclear ribonucleoprotein D	9.11698	9.16226	9.08091	8.12517	8.08848	8.07522	-2.03321	-1.02376	2.03321	down	1.95542e-13	4.65807e-12
93099	DMKN	dermokine	5.1228	4.83569	5.15784	6.84261	6.88214	6.77811	3.47138	1.79551	3.47138	up	9.50287e-12	1.11392e-10
79590	MRPL24	mitochondrial ribosomal protein L24	9.86556	9.86656	9.92783	8.42139	8.42301	8.44576	-2.7446	-1.4566	2.7446	down	3.64314e-16	3.26882e-14
10778	ZNF271P	zinc finger protein 271, pseudogene	8.00412	8.04583	8.02688	6.9916	6.99849	7.01082	-2.03539	-1.02531	2.03539	down	1.62428e-12	2.57325e-11
56256	SERTAD4	SERTA domain containing 4	6.70504	6.85428	6.78141	5.35731	5.15886	5.12609	-2.96115	-1.56616	2.96115	down	1.46494e-11	1.59956e-10
257194	NEGR1	neuronal growth regulator 1	7.22231	7.08795	7.14126	5.58123	5.80538	5.7668	-2.69952	-1.4327	2.69952	down	1.49994e-11	1.63232e-10
3939	LDHA	lactate dehydrogenase A	13.5619	13.5154	13.583	11.7543	11.7531	11.7716	-3.46733	-1.79383	3.46733	down	6.52978e-19	4.13728e-16
57128	LYRM4	LYR motif containing 4	6.36426	6.18622	6.18372	4.68842	5.04989	5.17453	-2.41795	-1.27379	2.41795	down	1.78457e-08	7.96417e-08
6303	SAT1	spermidine/spermine N1-acetyltransferase 1	7.67531	7.50157	7.45585	10.2101	10.1031	10.0438	5.95766	2.57475	5.95766	up	2.18996e-16	2.23615e-14
652968	GATSL3	GATS protein-like 3	5.8021	5.94313	5.99947	7.50783	7.56517	7.54534	3.08345	1.62455	3.08345	up	4.56363e-13	9.16231e-12
8674	VAMP4	vesicle associated membrane protein 4	6.31797	6.45972	6.35389	4.24699	3.6674	3.87325	-5.45652	-2.44798	5.45652	down	1.34001e-11	1.48633e-10
54877	ZCCHC2	zinc finger, CCHC domain containing 2	6.79272	6.65668	6.61659	5.32324	5.64009	5.54057	-2.27736	-1.18736	2.27736	down	1.71335e-09	1.00149e-08
57506	MAVS	mitochondrial antiviral signaling protein	6.30444	6.16105	6.40133	4.99458	5.37411	5.27438	-2.10611	-1.07458	2.10611	down	3.76543e-08	1.56136e-07
7374	UNG	uracil DNA glycosylase	9.425	9.46569	9.46744	7.9996	8.00156	8.03908	-2.71189	-1.4393	2.71189	down	7.91638e-16	5.9578e-14
11188	NISCH	nischarin	7.68453	7.59023	7.69711	8.63796	8.68551	8.67834	2.01388	1.00998	2.01388	up	1.28498e-12	2.13583e-11
401474	SAMD12	sterile alpha motif domain containing 12	5.4715	5.40496	5.54544	3.97403	4.13983	3.98237	-2.71677	-1.44189	2.71677	down	1.42835e-10	1.13166e-09
3930	LBR	lamin B receptor	8.08327	7.95344	8.04757	6.56721	6.75981	6.78859	-2.50167	-1.32289	2.50167	down	7.03546e-12	8.63954e-11
23046	KIF21B	kinesin family member 21B	5.78273	5.48526	5.5383	4.22148	3.81099	3.88383	-3.09512	-1.63	3.09512	down	1.39335e-09	8.3295e-09
10721	POLQ	polymerase (DNA directed), theta	6.66852	6.56741	6.72925	4.4277	4.52456	4.28554	-4.73203	-2.24246	4.73203	down	2.8651e-13	6.34334e-12
154467	CCDC167	coiled-coil domain containing 167	8.06942	7.96137	8.22122	7.07936	7.08899	7.05068	-2.0153	-1.01099	2.0153	down	1.26531e-10	1.01615e-09
3720	JARID2	jumonji and AT-rich interaction domain containing 2	7.19392	7.13559	7.36804	8.20756	8.26662	8.26569	2.01965	1.01411	2.01965	up	6.76769e-11	5.89918e-10
117177	RAB3IP	RAB3A interacting protein	4.78631	4.87303	5.02402	3.66701	3.97919	3.97523	-2.02882	-1.02064	2.02882	down	1.51778e-07	5.535e-07
54842	MFSD6	major facilitator superfamily domain containing 6	5.5633	5.45868	5.37718	3.99527	4.15669	3.75878	-2.82087	-1.49614	2.82087	down	1.17843e-09	7.1782e-09
23230	VPS13A	vacuolar protein sorting 13 homolog A (S. cerevisiae)	7.60018	7.54884	7.52932	8.74436	8.69094	8.69109	2.21814	1.14935	2.21814	up	1.19185e-13	3.128e-12
5142	PDE4B	phosphodiesterase 4B	6.22181	6.2927	6.39248	7.24591	7.3594	7.38412	2.03846	1.02748	2.03846	up	2.01804e-10	1.53021e-09
10257	ABCC4	ATP binding cassette subfamily C member 4	6.96515	6.97031	6.8305	5.163	5.47564	5.19786	-3.12348	-1.64315	3.12348	down	2.73659e-11	2.70759e-10
4437	MSH3	mutS homolog 3	8.09687	7.91567	7.94346	6.98382	6.85204	6.97331	-2.06901	-1.04894	2.06901	down	5.8876e-11	5.23951e-10
1047	CLGN	calmegin	8.01861	7.9006	7.84783	6.90532	6.86043	6.79921	-2.0956	-1.06736	2.0956	down	2.16158e-11	2.21699e-10
23554	TSPAN12	tetraspanin 12	6.12122	6.09879	5.87528	4.61962	4.2948	4.62336	-2.86626	-1.51917	2.86626	down	8.32044e-10	5.28074e-09
4131	MAP1B	microtubule associated protein 1B	10.9127	10.9276	10.9371	9.8804	9.90616	9.9131	-2.03625	-1.02591	2.03625	down	2.78223e-15	1.59724e-13
51132	RLIM	ring finger protein, LIM domain interacting	6.50835	6.44906	6.58144	7.8552	7.77612	7.79755	2.45662	1.29667	2.45662	up	1.03948e-12	1.79631e-11
9134	CCNE2	cyclin E2	7.92404	7.87745	7.65066	4.96397	5.06947	5.03918	-6.93154	-2.79318	6.93154	down	4.17565e-15	2.13743e-13
578	BAK1	BCL2-antagonist/killer 1	6.97688	6.84176	7.00806	7.95481	7.93846	7.95625	2.01057	1.00761	2.01057	up	2.2101e-11	2.26084e-10
4175	MCM6	minichromosome maintenance complex component 6	6.64159	6.59797	6.74948	4.20001	4.258	4.25587	-5.37049	-2.42505	5.37049	down	2.55287e-14	9.05047e-13
57559	STAMBPL1	STAM binding protein like 1	7.81331	7.6364	7.72837	6.43689	6.46002	6.44812	-2.42449	-1.27768	2.42449	down	2.37627e-12	3.51333e-11
3161	HMMR	hyaluronan-mediated motility receptor (RHAMM)	8.75996	8.87325	8.74042	5.43853	5.68862	5.92112	-8.62457	-3.10845	8.62457	down	1.51819e-14	5.94689e-13
390928	ACP7	acid phosphatase 7, tartrate resistant (putative)	5.88489	5.7603	5.92229	7.10821	7.10175	6.95776	2.29752	1.20008	2.29752	up	7.86222e-11	6.72508e-10
6891	TAP2	transporter 2, ATP-binding cassette, sub-family B (MDR/TAP)	7.53259	7.44181	7.49294	6.16793	6.04325	6.19291	-2.55694	-1.35442	2.55694	down	2.51506e-12	3.68079e-11
6885	MAP3K7	mitogen-activated protein kinase kinase kinase 7	8.50551	8.44988	8.45364	7.29477	7.14195	7.28624	-2.34354	-1.22869	2.34354	down	7.34023e-13	1.3468e-11
1410	CRYAB	crystallin alpha B	5.96758	5.92994	5.7953	7.17801	7.20792	7.30959	2.52141	1.33423	2.52141	up	1.2263e-11	1.37933e-10
1462	VCAN	versican	10.0618	10.0737	10.0392	8.43942	8.4612	8.49745	-3.01514	-1.59222	3.01514	down	7.51994e-17	1.00292e-14
84250	SLF1	SMC5-SMC6 complex localization factor 1	5.3217	5.18414	4.94848	3.90218	4.02751	4.05554	-2.22895	-1.15636	2.22895	down	2.28558e-08	9.94203e-08
5265	SERPINA1	serpin peptidase inhibitor, clade A (alpha-1 antiproteinase, antitrypsin), member 1	5.73453	5.64125	5.54666	7.36277	7.36965	7.28596	3.24596	1.69865	3.24596	up	4.3924e-13	8.89137e-12
653145	ANXA8	annexin A8	5.33445	5.69956	5.45618	4.24644	4.29303	4.79653	-2.07254	-1.0514	2.07254	down	2.15265e-06	6.31968e-06
11217	AKAP2	A-kinase anchoring protein 2	10.9175	10.9056	10.8973	9.72742	9.68056	9.71089	-2.29824	-1.20053	2.29824	down	4.69826e-16	4.00475e-14
54962	TIPIN	TIMELESS interacting protein	6.47145	6.57419	6.49251	4.87673	4.91377	5.08532	-2.93653	-1.55411	2.93653	down	1.39824e-11	1.54256e-10
23657	SLC7A11	solute carrier family 7 (anionic amino acid transporter light chain, xc- system), member 11	7.38402	7.3756	7.50279	8.76444	8.78257	8.8478	2.59812	1.37747	2.59812	up	6.42232e-14	1.88065e-12
3833	KIFC1	kinesin family member C1	8.293	8.37429	8.36425	5.88606	5.88284	5.70672	-5.73042	-2.51864	5.73042	down	6.95503e-16	5.37026e-14
9748	SLK	STE20 like kinase	7.62752	7.5793	7.72307	8.75659	8.69486	8.80761	2.15804	1.10972	2.15804	up	1.59834e-12	2.53907e-11
5887	RAD23B	RAD23 homolog B, nucleotide excision repair protein	7.12885	7.21157	7.27596	9.03255	9.09452	9.2018	3.74292	1.90416	3.74292	up	4.14124e-15	2.13094e-13
6790	AURKA	aurora kinase A	10.0363	9.8864	9.89929	7.7629	7.82065	7.78269	-4.44422	-2.15193	4.44422	down	6.31744e-17	8.91032e-15
28755	TRAC	T-cell receptor alpha constant	5.16475	5.21057	5.34486	4.13679	4.06503	3.20142	-2.71129	-1.43898	2.71129	down	2.08887e-06	6.14483e-06
56992	KIF15	kinesin family member 15	7.47827	7.39626	7.54632	5.4476	5.00311	5.05574	-4.94099	-2.3048	4.94099	down	2.26602e-12	3.37195e-11
3078	CFHR1	complement factor H-related 1	7.52947	7.44866	7.35247	8.63912	8.59632	8.54164	2.21733	1.14883	2.21733	up	2.24497e-12	3.34559e-11
729533	FAM72A	family with sequence similarity 72 member A	7.22947	7.35694	7.43963	5.1171	5.18689	5.12881	-4.58762	-2.19775	4.58762	down	3.28709e-14	1.10254e-12
11335	CBX3	chromobox 3	11.2926	11.1637	11.065	9.39201	9.37987	9.35926	-3.47431	-1.79673	3.47431	down	1.63648e-15	1.05191e-13
116535	MRGPRF	MAS related GPR family member F	8.66532	8.58042	8.72325	10.0132	10.0152	10.0138	2.56283	1.35774	2.56283	up	5.60593e-15	2.7314e-13
23400	ATP13A2	ATPase type 13A2	8.20612	7.97479	8.24699	6.5419	6.41759	6.52988	-3.13003	-1.64618	3.13003	down	1.31827e-12	2.17823e-11
151050	KANSL1L	KAT8 regulatory NSL complex subunit 1 like	4.15521	4.25288	3.97564	5.14193	5.25711	5.12189	2.06442	1.04573	2.06442	up	2.38779e-08	1.03362e-07
83989	FAM172A	family with sequence similarity 172 member A	6.97126	6.9681	6.50916	5.52777	5.62589	5.62204	-2.33638	-1.22427	2.33638	down	1.6088e-08	7.27157e-08
1459	CSNK2A2	casein kinase 2, alpha prime polypeptide	8.41038	8.34011	8.30471	7.16714	7.1978	7.1743	-2.25322	-1.17199	2.25322	down	3.29959e-13	7.09692e-12
79815	NIPAL2	NIPA-like domain containing 2	6.58072	6.33485	6.58072	5.06933	5.21626	5.22211	-2.51321	-1.32953	2.51321	down	3.16824e-10	2.26485e-09
10457	GPNMB	glycoprotein (transmembrane) nmb	8.44265	8.57274	8.46533	9.71187	9.68271	9.62654	2.26598	1.18013	2.26598	up	1.00387e-13	2.72023e-12
8473	OGT	O-linked N-acetylglucosamine (GlcNAc) transferase	7.21136	7.09801	7.19683	8.51099	8.57217	8.56473	2.6037	1.38056	2.6037	up	5.37557e-14	1.63773e-12
157680	VPS13B	vacuolar protein sorting 13 homolog B (yeast)	4.68464	4.96742	4.69749	5.92337	5.89506	5.9526	2.20456	1.14049	2.20456	up	4.08549e-09	2.14994e-08
9618	TRAF4	TNF receptor associated factor 4	7.33026	7.33104	7.40828	9.50617	9.50621	9.5282	4.45986	2.157	4.45986	up	1.17431e-17	2.67998e-15
5093	PCBP1	poly(rC) binding protein 1	11.5685	11.6041	11.6243	9.93104	9.97702	9.90679	-3.16173	-1.66071	3.16173	down	1.20955e-17	2.71826e-15
56993	TOMM22	translocase of outer mitochondrial membrane 22 homolog (yeast)	10.643	10.6636	10.6091	9.55309	9.51649	9.57518	-2.12923	-1.09033	2.12923	down	4.99124e-15	2.48991e-13
254251	LCORL	ligand dependent nuclear receptor corepressor like	6.41695	6.35352	6.51833	5.17336	5.44709	5.31722	-2.16902	-1.11704	2.16902	down	2.30333e-09	1.29798e-08
5167	ENPP1	ectonucleotide pyrophosphatase/phosphodiesterase 1	6.08643	6.18139	6.36638	4.73436	4.82055	4.58519	-2.82457	-1.49803	2.82457	down	2.08044e-10	1.57175e-09
731220	RFX8	RFX family member 8, lacking RFX DNA binding domain	7.21165	7.25464	7.31305	6.19668	6.17826	6.14326	-2.12439	-1.08705	2.12439	down	2.09117e-11	2.15605e-10
7343	UBTF	upstream binding transcription factor, RNA polymerase I	7.96914	7.77398	7.85173	6.53246	6.551	6.61254	-2.46163	-1.29962	2.46163	down	2.89001e-12	4.11913e-11
81563	C1orf21	chromosome 1 open reading frame 21	6.11284	6.12957	6.24545	4.47065	3.97277	4.23996	-3.82332	-1.93483	3.82332	down	8.3695e-11	7.09077e-10
2000	ELF4	E74-like factor 4 (ets domain transcription factor)	8.21985	8.19231	8.29612	6.53973	6.57621	6.47529	-3.26183	-1.70568	3.26183	down	1.26516e-14	5.17818e-13
148534	TMEM56	transmembrane protein 56	5.46552	5.56398	5.47503	4.10101	4.1952	3.93453	-2.68439	-1.4246	2.68439	down	2.86115e-10	2.06832e-09
9310	ZNF235	zinc finger protein 235	5.43861	5.39634	5.44236	6.59051	6.93742	6.42127	2.33588	1.22396	2.33588	up	1.51933e-08	6.90782e-08
159090	FAM122B	family with sequence similarity 122B	8.40707	8.33347	8.29268	6.87303	6.8751	6.81467	-2.80916	-1.49014	2.80916	down	3.28082e-14	1.10138e-12
6175	RPLP0	ribosomal protein, large, P0	13.3328	13.3961	13.3864	11.7165	11.7722	11.6948	-3.12513	-1.64392	3.12513	down	8.95562e-18	2.29363e-15
83540	NUF2	NUF2, NDC80 kinetochore complex component	8.3957	8.31945	8.28045	5.70447	5.79795	5.59442	-6.2028	-2.63292	6.2028	down	5.72924e-16	4.60784e-14
80201	HKDC1	hexokinase domain containing 1	8.54473	8.48721	8.53215	9.55596	9.62622	9.64006	2.12292	1.08605	2.12292	up	5.2837e-14	1.6135e-12
55745	AP5M1	adaptor-related protein complex 5, mu 1 subunit	8.96973	8.91413	8.86467	7.68875	7.68763	7.66303	-2.35606	-1.23637	2.35606	down	4.11321e-14	1.31656e-12
4193	MDM2	MDM2 proto-oncogene, E3 ubiquitin protein ligase	3.92023	4.08906	4.0113	5.39813	5.15513	5.22993	2.38535	1.2542	2.38535	up	2.0577e-09	1.17613e-08
8875	VNN2	vanin 2	5.19778	5.37384	5.49069	4.18307	3.92114	4.06899	-2.4561	-1.29637	2.4561	down	4.01942e-09	2.11915e-08
137964	GPAT4	glycerol-3-phosphate acyltransferase 4	7.10085	6.98457	7.1819	5.76409	6.17751	6.16396	-2.07616	-1.05392	2.07616	down	4.22718e-08	1.73394e-07
2729	GCLC	glutamate-cysteine ligase, catalytic subunit	5.66898	5.43922	5.69681	6.79303	6.76664	6.71498	2.22923	1.15655	2.22923	up	5.55852e-10	3.69218e-09
409	ARRB2	arrestin, beta 2	6.50882	6.7645	6.675	3.98043	4.29707	4.69308	-5.01383	-2.32591	5.01383	down	1.6655e-10	1.29804e-09
7474	WNT5A	wingless-type MMTV integration site family member 5A	9.20507	9.18621	8.95431	7.992	7.83455	7.82889	-2.34575	-1.23005	2.34575	down	2.27987e-11	2.3195e-10
8208	CHAF1B	chromatin assembly factor 1 subunit B	7.42116	7.40593	7.29129	6.27633	6.1693	5.99634	-2.33832	-1.22547	2.33832	down	1.34852e-10	1.07492e-09
10336	PCGF3	polycomb group ring finger 3	5.93467	6.02805	6.03422	7.20003	7.05748	6.95629	2.10276	1.07229	2.10276	up	4.75193e-10	3.22861e-09
55901	THSD1	thrombospondin type 1 domain containing 1	4.9635	4.69571	5.21809	6.25297	6.33604	6.50397	2.64859	1.40523	2.64859	up	8.31263e-09	4.0284e-08
730755	KRTAP2-3	keratin associated protein 2-3	5.71031	5.85457	5.85457	4.70486	4.79217	4.80183	-2.05651	-1.0402	2.05651	down	3.09868e-09	1.68235e-08
284207	METRNL	meteorin, glial cell differentiation regulator-like	7.54672	7.56944	7.74852	8.8497	8.87998	8.82075	2.34337	1.22858	2.34337	up	1.40469e-12	2.2854e-11
5743	PTGS2	prostaglandin-endoperoxide synthase 2 (prostaglandin G/H synthase and cyclooxygenase)	5.0347	5.08161	5.08215	8.17747	8.17755	8.15178	8.59073	3.10278	8.59073	up	1.37739e-17	2.8881e-15
1293	COL6A3	collagen, type VI, alpha 3	11.7158	11.7261	11.7944	10.3462	10.3462	10.3782	-2.61824	-1.3886	2.61824	down	1.16677e-16	1.39055e-14
30014	SPANXA1	sperm protein associated with the nucleus, X-linked, family member A1	3.32433	3.67032	3.95257	5.18786	5.25994	5.41988	3.11699	1.64015	3.11699	up	8.01859e-09	3.90085e-08
22974	TPX2	TPX2, microtubule-associated	10.4283	10.4679	10.401	7.94231	7.96841	8.00705	-5.50137	-2.45979	5.50137	down	4.5106e-19	3.76299e-16
10611	PDLIM5	PDZ and LIM domain 5	5.91207	5.93914	5.84096	4.84499	4.59652	5.10374	-2.06906	-1.04897	2.06906	down	1.5777e-07	5.73482e-07
7414	VCL	vinculin	11.8349	11.7855	11.7379	10.0777	10.0093	10.0855	-3.31408	-1.72861	3.31408	down	2.795e-17	4.91444e-15
7158	TP53BP1	tumor protein p53 binding protein 1	6.86951	6.92078	6.72493	8.08419	8.13747	8.01377	2.3621	1.24007	2.3621	up	5.68188e-12	7.23333e-11
3992	FADS1	fatty acid desaturase 1	8.46913	8.56606	8.50733	6.36791	6.27741	6.39161	-4.49565	-2.16853	4.49565	down	5.1044e-16	4.24033e-14
5432	POLR2C	polymerase (RNA) II (DNA directed) polypeptide C, 33kDa	8.9458	9.00315	8.93773	6.55313	6.62161	6.5577	-5.22252	-2.38475	5.22252	down	2.02528e-17	3.89271e-15
9702	CEP57	centrosomal protein 57kDa	5.57949	5.5592	5.55482	4.55551	4.406	4.49614	-2.11201	-1.07862	2.11201	down	1.94601e-09	1.11996e-08
8110	DPF3	D4, zinc and double PHD fingers, family 3	6.00456	6.32682	6.07759	5.03717	5.07633	4.86461	-2.20935	-1.14362	2.20935	down	9.5476e-09	4.55649e-08
55691	FRMD4A	FERM domain containing 4A	8.25599	8.14443	8.2611	6.21135	6.27607	6.25848	-3.92277	-1.97187	3.92277	down	2.68975e-15	1.55553e-13
161176	SYNE3	spectrin repeat containing, nuclear envelope family member 3	7.85915	7.80719	7.88985	5.91349	5.93904	5.79971	-3.91221	-1.96798	3.91221	down	1.15333e-14	4.82626e-13
10082	GPC6	glypican 6	8.10625	8.19265	8.01952	4.79873	4.90381	5.06061	-9.0951	-3.18509	9.0951	down	6.38099e-16	4.99323e-14
55922	NKRF	NFKB repressing factor	8.14126	8.16833	8.16211	6.61474	6.72283	6.77877	-2.73547	-1.45179	2.73547	down	1.49601e-13	3.74336e-12
79864	C11orf63	chromosome 11 open reading frame 63	5.24736	5.27361	5.49323	4.36237	3.71441	4.20835	-2.36694	-1.24302	2.36694	down	4.08495e-07	1.37309e-06
653820	FAM72B	family with sequence similarity 72 member B	7.22947	7.35694	7.43963	5.1171	5.18689	5.12881	-4.58762	-2.19775	4.58762	down	3.28709e-14	1.10254e-12
440224	CXADRP3	coxsackie virus and adenovirus receptor pseudogene 3	5.23069	5.27265	5.34534	6.93469	6.86503	6.90938	3.07405	1.62014	3.07405	up	8.46484e-13	1.51902e-11
100129518	LOC100129518	uncharacterized LOC100129518	5.6807	5.49121	5.61964	6.85127	6.77879	6.78394	2.30934	1.20748	2.30934	up	8.04684e-11	6.86502e-10
23705	CADM1	cell adhesion molecule 1	5.82191	6.04035	5.94037	6.97668	6.98407	6.96336	2.05693	1.04049	2.05693	up	3.55629e-10	2.5039e-09
685	BTC	betacellulin	5.35763	5.49103	5.75565	4.24254	4.53293	4.42337	-2.19642	-1.13516	2.19642	down	6.64994e-08	2.61084e-07
118611	C10orf90	chromosome 10 open reading frame 90	8.31728	8.53776	8.43205	6.27674	6.31738	6.46311	-4.21818	-2.07662	4.21818	down	2.67431e-14	9.39602e-13
29995	LMCD1	LIM and cysteine-rich domains 1	6.62669	6.67559	6.5577	3.71441	3.41153	3.52838	-8.38932	-3.06855	8.38932	down	1.36482e-14	5.49431e-13
10940	POP1	POP1 homolog, ribonuclease P/MRP subunit	7.62558	7.49606	7.60709	6.20445	6.20503	6.28071	-2.54238	-1.34618	2.54238	down	1.52454e-12	2.44988e-11
8728	ADAM19	ADAM metallopeptidase domain 19	7.50854	7.43848	7.58071	6.26864	6.30748	6.29781	-2.32613	-1.21793	2.32613	down	4.31361e-12	5.77455e-11
10614	HEXIM1	hexamethylene bis-acetamide inducible 1	6.29648	6.10214	6.25744	7.79096	7.77042	7.68383	2.88729	1.52972	2.88729	up	8.8152e-13	1.57111e-11
3308	HSPA4	heat shock protein family A (Hsp70) member 4	8.83551	8.79418	8.77017	7.53736	7.55996	7.6195	-2.3419	-1.22768	2.3419	down	5.6319e-14	1.69867e-12
30846	EHD2	EH domain containing 2	8.31908	8.31965	8.3495	9.33483	9.35771	9.29853	2.00131	1.00095	2.00131	up	9.02502e-14	2.48671e-12
1841	DTYMK	deoxythymidylate kinase	10.0572	10.1708	10.129	8.97786	8.96618	9.03125	-2.18445	-1.12727	2.18445	down	3.72874e-14	1.21331e-12
3936	LCP1	lymphocyte cytosolic protein 1 (L-plastin)	8.40138	8.45929	8.24128	6.48442	6.32721	6.13769	-4.14358	-2.05088	4.14358	down	5.3964e-13	1.04594e-11
57189	KIAA1147	KIAA1147	6.20666	6.06639	6.34397	7.46821	7.49204	7.5228	2.44304	1.28868	2.44304	up	3.02318e-11	2.948e-10
2919	CXCL1	chemokine (C-X-C motif) ligand 1 (melanoma growth stimulating activity, alpha)	4.19303	4.50771	4.15072	5.61302	5.46503	5.38231	2.30213	1.20297	2.30213	up	1.92348e-08	8.5249e-08
8148	TAF15	TATA-box binding protein associated factor 15	7.25275	7.39409	7.27457	8.30405	8.41611	8.40612	2.09695	1.06829	2.09695	up	6.86207e-12	8.46372e-11
146880	LOC146880	Rho GTPase activating protein 27 pseudogene	11.8886	11.908	11.9175	10.4096	10.3837	10.4515	-2.80842	-1.48976	2.80842	down	2.09759e-17	3.99254e-15
9540	TP53I3	tumor protein p53 inducible protein 3	7.2911	7.28199	7.34067	8.3574	8.34916	8.35662	2.07025	1.04981	2.07025	up	5.33619e-13	1.03729e-11
3148	HMGB2	high mobility group box 2	11.0495	11.0732	11.0344	9.35212	9.25433	9.29594	-3.36733	-1.7516	3.36733	down	1.77552e-17	3.49839e-15
65267	WNK3	WNK lysine deficient protein kinase 3	5.45896	5.29185	5.41966	4.3469	4.20589	4.43978	-2.08392	-1.0593	2.08392	down	1.25777e-08	5.81638e-08
1761	DMRT1	doublesex and mab-3 related transcription factor 1	6.06941	6.1379	5.87343	4.96397	5.01142	4.74669	-2.1728	-1.11955	2.1728	down	1.17086e-08	5.45889e-08
174	AFP	alpha-fetoprotein	6.10408	6.03422	6.18212	4.59649	4.48867	4.30004	-3.12764	-1.64507	3.12764	down	4.59089e-11	4.22755e-10
79745	CLIP4	CAP-Gly domain containing linker protein family member 4	6.99472	6.96535	7.12917	8.31054	8.27629	8.32285	2.41744	1.27348	2.41744	up	6.54089e-13	1.22536e-11
51018	RRP15	ribosomal RNA processing 15 homolog	6.52772	6.51193	6.60765	5.5679	5.30289	5.64216	-2.06306	-1.04478	2.06306	down	9.28425e-09	4.44651e-08
10914	PAPOLA	poly(A) polymerase alpha	9.41027	9.26849	9.24405	8.08006	8.06681	8.04846	-2.36607	-1.24249	2.36607	down	1.55983e-13	3.86604e-12
55332	DRAM1	DNA damage regulated autophagy modulator 1	6.71573	6.64675	6.61302	8.43327	8.57914	8.46327	3.56374	1.83339	3.56374	up	6.93838e-15	3.21197e-13
11065	UBE2C	ubiquitin conjugating enzyme E2C	10.77	10.7706	10.636	8.58296	8.38889	8.50776	-4.69901	-2.23236	4.69901	down	2.55583e-16	2.49289e-14
154091	SLC2A12	solute carrier family 2 (facilitated glucose transporter), member 12	3.95709	4.37691	4.32418	6.06658	6.29416	6.07929	3.80338	1.92728	3.80338	up	9.57179e-11	7.95316e-10
4035	LRP1	LDL receptor related protein 1	8.01931	7.94142	7.96423	9.03454	9.05488	9.03604	2.09483	1.06683	2.09483	up	1.03377e-13	2.78776e-12
64506	CPEB1	cytoplasmic polyadenylation element binding protein 1	6.57472	6.57161	6.50094	8.18036	7.99456	7.97511	2.83023	1.50092	2.83023	up	6.70755e-13	1.25299e-11
8243	SMC1A	structural maintenance of chromosomes 1A	7.95156	8.03419	8.02349	6.8085	6.77456	6.72815	-2.35003	-1.23268	2.35003	down	5.68481e-13	1.09158e-11
2098	ESD	esterase D	11.5008	11.4708	11.472	10.4433	10.4265	10.3966	-2.08354	-1.05904	2.08354	down	1.48853e-15	9.72755e-14
83667	SESN2	sestrin 2	7.81716	7.8403	7.86028	9.57708	9.4731	9.45583	3.16621	1.66276	3.16621	up	8.10432e-16	6.07591e-14
2177	FANCD2	Fanconi anemia complementation group D2	6.77749	6.69167	6.78099	4.89118	5.05212	5.23268	-3.22968	-1.69139	3.22968	down	1.79073e-11	1.89513e-10
100533105	C8orf44-SGK3	C8orf44-SGK3 readthrough	6.11807	6.20943	6.02469	4.66752	4.74778	4.85478	-2.5681	-1.3607	2.5681	down	1.66935e-10	1.30001e-09
113419	TEX261	testis expressed 261	9.11417	9.09532	9.19564	7.85158	7.99395	7.97757	-2.28788	-1.19401	2.28788	down	4.00576e-13	8.31916e-12
55084	SOBP	sine oculis binding protein homolog	5.38354	5.32734	5.4038	6.44404	6.38407	6.46258	2.08301	1.05867	2.08301	up	3.06423e-10	2.20052e-09
11013	TMSB15A	thymosin beta 15a	8.17152	8.05521	8.07026	5.64294	5.7255	5.57586	-5.46756	-2.4509	5.46756	down	9.59645e-16	6.94238e-14
8349	HIST2H2BE	histone cluster 2, H2be	6.50618	6.48225	6.56739	8.42187	8.29391	8.38345	3.59952	1.8478	3.59952	up	4.5155e-15	2.28455e-13
6505	SLC1A1	solute carrier family 1 (neuronal/epithelial high affinity glutamate transporter, system Xag), member 1	7.49685	7.38594	7.50702	5.79677	5.86274	6.02502	-2.96581	-1.56843	2.96581	down	2.50365e-12	3.67018e-11
54880	BCOR	BCL6 corepressor	6.83854	6.84908	6.78483	5.44579	5.50375	5.47659	-2.54695	-1.34877	2.54695	down	5.32309e-12	6.86348e-11
4087	SMAD2	SMAD family member 2	7.34418	7.36569	7.53399	5.90695	5.98196	5.97766	-2.74936	-1.4591	2.74936	down	2.66273e-12	3.84551e-11
729163	FABP5P2	fatty acid binding protein 5 pseudogene 2	7.12742	7.06828	6.97244	5.06818	5.34703	5.18312	-3.62154	-1.8566	3.62154	down	1.9831e-12	3.03029e-11
8317	CDC7	cell division cycle 7	7.27622	7.21316	7.22599	5.04244	5.20266	5.27322	-4.18632	-2.06568	4.18632	down	1.15544e-13	3.0451e-12
7716	VEZF1	vascular endothelial zinc finger 1	8.1124	7.98889	7.9358	6.90707	6.95434	6.9249	-2.11931	-1.08359	2.11931	down	9.93704e-12	1.15412e-10
